# Supplementary material for: Association between patient-surgeon gender concordance and mortality after surgery in the United States: retrospective observational study
Source: PubMed Central journal article supplement — BMJ. 2023 Nov 22;383:e075484. doi: 10.1136/bmj-2023-075484 (PMC10664070; doi:10.1136/bmj-2023-075484), 2023-11-22
Supplement: walc075484.ww.pdf [file walc075484.ww.pdf]

Online Supplement

Association between patient-surgeon gender concordance and post-operative mortality  
in the United States: observational study

eFigure 1. A direct acyclic graph for the association between patient-surgeon gender concordance and post-operative mortality

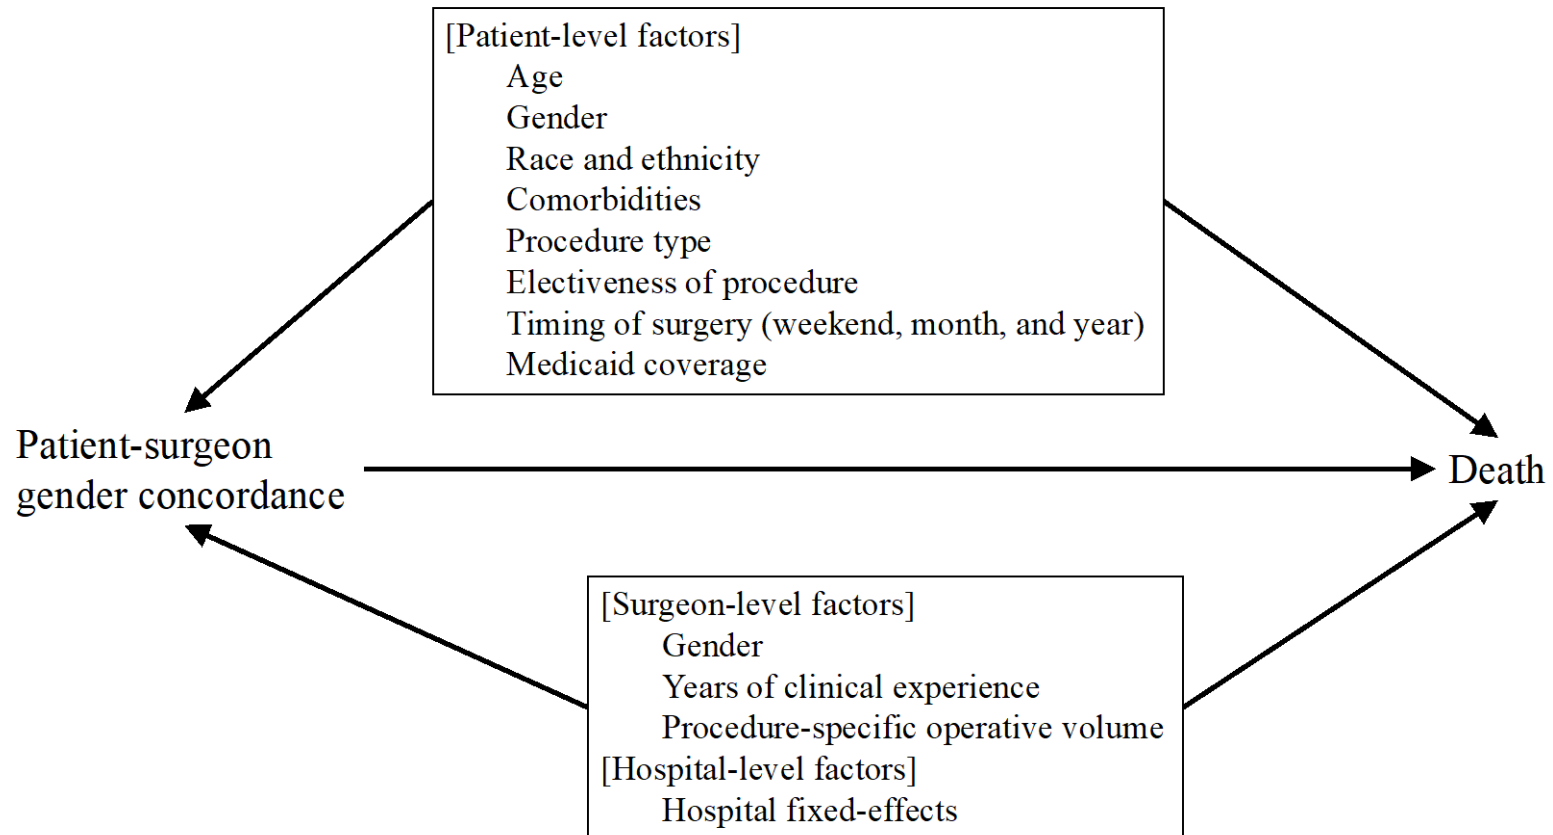

**eTable 1. Association between patient-surgeon gender concordance and patient adjusted 30-day mortality rates (elective and non-elective procedures combined)**

|                             |                                               | No. of patients<br>(No. of surgeons) | Adjusted mortality rate, % (95%CI) | Adjusted risk difference, pp (95%CI) | P-value |
|-----------------------------|-----------------------------------------------|--------------------------------------|------------------------------------|--------------------------------------|---------|
| 14 procedures<br>(combined) | Female patient-female surgeon<br>(concordant) | 86,133<br>(8,556)                    | 1.3<br>(1.2 to 1.5)                | -0.2<br>(-0.3 to -0.03)              | 0.016   |
|                             | Female patient-male surgeon<br>(discordant)   | 1,561,967<br>(44,295)                | 1.5<br>(1.5 to 1.5)                | Reference                            |         |
|                             | Male patient-male surgeon<br>(concordant)     | 1,201,712<br>(43,723)                | 2.0<br>(2.0 to 2.0)                | +0.3<br>(+0.1 to +0.4)               | 0.0010  |
|                             | Male patient-female surgeon<br>(discordant)   | 52,944<br>(5,371)                    | 1.7<br>(1.6 to 1.9)                | Reference                            |         |
| Knee replacement            | Female patient-female surgeon<br>(concordant) | 8,775<br>(375)                       | 0.2<br>(0.1 to 0.3)                | +0.03<br>(-0.1 to +0.1)              | 0.66    |
|                             | Female patient-male surgeon<br>(discordant)   | 541,786<br>(10,639)                  | 0.2<br>(0.1 to 0.2)                | Reference                            |         |
|                             | Male patient-male surgeon<br>(concordant)     | 313,120<br>(10,202)                  | 0.3<br>(0.2 to 0.3)                | +0.1<br>(-0.03 to +0.3)              | 0.12    |
|                             | Male patient-female surgeon<br>(discordant)   | 4,487<br>(334)                       | 0.1<br>(-0.04 to 0.3)              | Reference                            |         |
| Hip replacement             | Female patient-female surgeon<br>(concordant) | 10,421<br>(792)                      | 1.8<br>(1.4 to 2.2)                | +0.2<br>(-0.2 to +0.6)               | 0.33    |

|                                 |                                            |                     |                     |                           |        |
|---------------------------------|--------------------------------------------|---------------------|---------------------|---------------------------|--------|
|                                 | Female patient-male surgeon (discordant)   | 457,472<br>(14,164) | 1.6<br>(1.6 to 1.7) | Reference                 |        |
|                                 | Male patient-male surgeon (concordant)     | 255,394<br>(12,932) | 2.3<br>(2.2 to 2.4) | +0.3<br>(-0.4 to +0.9)    | 0.39   |
|                                 | Male patient-female surgeon (discordant)   | 5,048<br>(661)      | 2.0<br>(1.4 to 2.6) | Reference                 |        |
| Laminectomy<br>or Spinal Fusion | Female patient-female surgeon (concordant) | 5,417<br>(354)      | 0.4<br>(0.2 to 0.7) | -0.1<br>(-0.3 to +0.2)    | 0.59   |
|                                 | Female patient-male surgeon (discordant)   | 215,993<br>(6,486)  | 0.5<br>(0.5 to 0.5) | Reference                 |        |
|                                 | Male patient-male surgeon (concordant)     | 184,234<br>(6,602)  | 1.0<br>(1.0 to 1.1) | -0.19<br>(-0.63 to +0.24) | 0.38   |
|                                 | Male patient-female surgeon (discordant)   | 4,633<br>(377)      | 1.2<br>(0.8 to 1.7) | Reference                 |        |
| Colectomy                       | Female patient-female surgeon (concordant) | 20,956<br>(3,400)   | 5.1<br>(4.8 to 5.5) | -0.6<br>(-0.9 to -0.2)    | 0.0058 |
|                                 | Female patient-male surgeon (discordant)   | 117,629<br>(13,956) | 5.7<br>(5.5 to 5.8) | Reference                 |        |
|                                 | Male patient-male surgeon (concordant)     | 83,210<br>(12,908)  | 6.6<br>(6.4 to 6.7) | +0.5<br>(-0.1 to +1.0)    | 0.11   |

|                                |                                            |                    |                     |                           |        |
|--------------------------------|--------------------------------------------|--------------------|---------------------|---------------------------|--------|
|                                | Male patient-female surgeon (discordant)   | 11,695<br>(2,525)  | 6.1<br>(5.6 to 6.6) | Reference                 |        |
| Cholecystectomy                | Female patient-female surgeon (concordant) | 11,213<br>(2,721)  | 2.2<br>(1.9 to 2.5) | -0.2<br>(-0.6 to +0.1)    | 0.19   |
|                                | Female patient-male surgeon (discordant)   | 73,588<br>(12,189) | 2.5<br>(2.3 to 2.6) | Reference                 |        |
|                                | Male patient-male surgeon (concordant)     | 76,041<br>(12,029) | 2.6<br>(2.5 to 2.7) | +0.6<br>(+0.2 to +0.9)    | 0.0011 |
|                                | Male patient-female surgeon (discordant)   | 11,159<br>(2,557)  | 2.1<br>(1.8 to 2.4) | Reference                 |        |
| Coronary artery bypass surgery | Female patient-female surgeon (concordant) | 1,341<br>(145)     | 4.0<br>(2.6 to 5.4) | -0.86<br>(-2.34 to +0.63) | 0.26   |
|                                | Female patient-male surgeon (discordant)   | 39,956<br>(2,426)  | 4.9<br>(4.6 to 5.1) | Reference                 |        |
|                                | Male patient-male surgeon (concordant)     | 114,158<br>(2,790) | 2.7<br>(2.6 to 2.8) | +0.1<br>(-0.6 to +0.7)    | 0.82   |
|                                | Male patient-female surgeon (discordant)   | 3,954<br>(183)     | 2.6<br>(2.0 to 3.3) | Reference                 |        |
| Lung resection                 | Female patient-female surgeon (concordant) | 3,783<br>(246)     | 1.3<br>(0.9 to 1.8) | -0.2<br>(-0.7 to +0.3)    | 0.42   |

|                                  |                                            |                   |                     |                        |      |
|----------------------------------|--------------------------------------------|-------------------|---------------------|------------------------|------|
|                                  | Female patient-male surgeon (discordant)   | 41,188<br>(2,551) | 1.6<br>(1.4 to 1.7) | Reference              |      |
|                                  | Male patient-male surgeon (concordant)     | 36,870<br>(2,715) | 2.7<br>(2.6 to 2.9) | -0.1<br>(-0.8 to +0.6) | 0.78 |
|                                  | Male patient-female surgeon (discordant)   | 3,020<br>(243)    | 2.8<br>(2.1 to 3.5) | Reference              |      |
| Abdominal aortic aneurysm repair | Female patient-female surgeon (concordant) | 950<br>(356)      | 7.2<br>(5.1 to 9.4) | -0.2<br>(-2.5 to +2.1) | 0.85 |
|                                  | Female patient-male surgeon (discordant)   | 15,025<br>(3,251) | 7.5<br>(7.0 to 7.9) | Reference              |      |
|                                  | Male patient-male surgeon (concordant)     | 45,897<br>(4,009) | 4.4<br>(4.2 to 4.6) | -0.2<br>(-1.2 to +0.9) | 0.76 |
|                                  | Male patient-female surgeon (discordant)   | 2,970<br>(455)    | 4.5<br>(3.6 to 5.5) | Reference              |      |
| Appendectomy                     | Female patient-female surgeon (concordant) | 5,126<br>(2,209)  | 2.2<br>(1.8 to 2.6) | +0.3<br>(-0.2 to +0.8) | 0.24 |
|                                  | Female patient-male surgeon (discordant)   | 24,216<br>(9,195) | 1.9<br>(1.7 to 2.1) | Reference              |      |
|                                  | Male patient-male surgeon (concordant)     | 19,384<br>(8,466) | 2.8<br>(2.6 to 3.1) | +0.1<br>(-0.7 to +0.9) | 0.84 |

|                 |                                            |                   |                       |                         |       |
|-----------------|--------------------------------------------|-------------------|-----------------------|-------------------------|-------|
|                 | Male patient-female surgeon (discordant)   | 3,161<br>(1,633)  | 2.8<br>(2.1 to 3.5)   | Reference               |       |
| Cystectomy      | Female patient-female surgeon (concordant) | 306<br>(133)      | 1.0<br>(-0.6 to 2.6)  | -1.8<br>(-3.6 to +0.1)  | 0.058 |
|                 | Female patient-male surgeon (discordant)   | 2,994<br>(1,133)  | 2.8<br>(2.2 to 3.3)   | Reference               |       |
|                 | Male patient-male surgeon (concordant)     | 10,324<br>(1,945) | 3.1<br>(2.7 to 3.4)   | +0.3<br>(-1.3 to +1.9)  | 0.71  |
|                 | Male patient-female surgeon (discordant)   | 612<br>(127)      | 2.8<br>(1.3 to 4.3)   | Reference               |       |
| Thyroidectomy   | Female patient-female surgeon (concordant) | 410<br>(250)      | 0.3<br>(-0.5 to 1.1)  | -0.3<br>(-1.3 to +0.6)  | 0.47  |
|                 | Female patient-male surgeon (discordant)   | 2,198<br>(1,258)  | 0.6<br>(0.3 to 0.9)   | Reference               |       |
|                 | Male patient-male surgeon (concordant)     | 1,398<br>(886)    | 1.5<br>(0.8 to 2.2)   | +0.03<br>(-2.4 to +2.4) | 0.98  |
|                 | Male patient-female surgeon (discordant)   | 246<br>(150)      | 1.5<br>(-0.7 to 3.7)  | Reference               |       |
| Liver resection | Female patient-female surgeon (concordant) | 80<br>(58)        | 5.9<br>(-1.2 to 13.0) | +1.5<br>(-6.1 to +9.1)  | 0.69  |

|               |                                            |                   |                      |                        |       |
|---------------|--------------------------------------------|-------------------|----------------------|------------------------|-------|
|               | Female patient-male surgeon (discordant)   | 897<br>(464)      | 4.4<br>(3.1 to 5.7)  | Reference              |       |
|               | Male patient-male surgeon (concordant)     | 1,156<br>(522)    | 5.9<br>(4.7 to 7.2)  | +4.1<br>(-0.6 to +8.8) | 0.089 |
|               | Male patient-female surgeon (discordant)   | 121<br>(62)       | 1.9<br>(-2.4 to 6.1) | Reference              |       |
| Prostatectomy | Female patient-female surgeon (concordant) | N/A               | N/A                  | N/A                    | N/A   |
|               | Female patient-male surgeon (discordant)   | N/A               | N/A                  | Reference              |       |
|               | Male patient-male surgeon (concordant)     | 60,526<br>(5,479) | 0.9<br>(0.8 to 1.0)  | +0.2<br>(-0.4 to +0.9) | 0.45  |
|               | Male patient-female surgeon (discordant)   | 1,838<br>(365)    | 0.7<br>(0.1 to 1.3)  | Reference              |       |
| Hysterectomy  | Female patient-female surgeon (concordant) | 17,355<br>(3,533) | 0.9<br>(0.7 to 1.1)  | -0.1<br>(-0.4 to +0.1) | 0.25  |
|               | Female patient-male surgeon (discordant)   | 29,025<br>(5,372) | 1.0<br>(0.9 to 1.2)  | Reference              |       |
|               | Male patient-male surgeon (concordant)     | N/A               | N/A                  | N/A                    | N/A   |

|  |                                                 |     |     |           |
|--|-------------------------------------------------|-----|-----|-----------|
|  | Male patient-<br>female surgeon<br>(discordant) | N/A | N/A | Reference |
|--|-------------------------------------------------|-----|-----|-----------|

Adjusted for patient characteristics (age, race and ethnicity, 27 chronic conditions, procedure type [for the analysis pooling the 14 procedure types], procedure electiveness, weekend versus weekday, month and year of surgery, and Medicaid coverage), surgeon characteristics (years of experience and operative volume), and hospital fixed effects (indicator variables for each hospital, effectively comparing patients treated at the same hospital).

Abbreviation: pp = percentage point.



**eTable 2. Association between patient-surgeon gender concordance and adjusted 30-day readmission rates (elective and non-elective procedures combined)**

|                             |                                                   | No. of patients<br>(No. of<br>surgeons) | Adjusted readmission<br>rate, %<br>(95%CI) | Adjusted risk difference,<br>pp<br>(95%CI) | P-value |
|-----------------------------|---------------------------------------------------|-----------------------------------------|--------------------------------------------|--------------------------------------------|---------|
| 14 procedures<br>(combined) | Female patient-<br>female surgeon<br>(concordant) | 85,951<br>(8,550)                       | 5.8<br>(5.6 to 6.0)                        | -0.4<br>(-0.6 to -0.2)                     | 0.0007  |
|                             | Female patient-<br>male surgeon<br>(discordant)   | 1,559,937<br>(44,258)                   | 6.2<br>(6.1 to 6.2)                        | Reference                                  |         |
|                             | Male patient-<br>male surgeon<br>(concordant)     | 1,199,732<br>(43,689)                   | 7.4<br>(7.3 to 7.4)                        | -0.1<br>(-0.4 to +0.2)                     | 0.49    |
|                             | Male patient-<br>female surgeon<br>(discordant)   | 52,797<br>(5,364)                       | 7.5<br>(7.2 to 7.7)                        | Reference                                  |         |
| Knee replacement            | Female patient-<br>female surgeon<br>(concordant) | 8,775<br>(375)                          | 3.4<br>(2.9 to 3.9)                        | -0.1<br>(-0.6 to +0.4)                     | 0.70    |
|                             | Female patient-<br>male surgeon<br>(discordant)   | 541,655<br>(10,636)                     | 3.5<br>(3.5 to 3.6)                        | Reference                                  |         |
|                             | Male patient-<br>male surgeon<br>(concordant)     | 313,027<br>(10,200)                     | 4.5<br>(4.5 to 4.6)                        | +0.02<br>(-0.8 to +0.8)                    | 0.97    |
|                             | Male patient-<br>female surgeon<br>(discordant)   | 4,487<br>(334)                          | 4.5<br>(3.8 to 5.3)                        | Reference                                  |         |
| Hip replacement             | Female patient-<br>female surgeon<br>(concordant) | 10,404<br>(791)                         | 5.8<br>(5.3 to 6.4)                        | -0.5<br>(-1.0 to +0.1)                     | 0.13    |

|                                 |                                            |                     |                        |                        |      |
|---------------------------------|--------------------------------------------|---------------------|------------------------|------------------------|------|
|                                 | Female patient-male surgeon (discordant)   | 456,823<br>(14,155) | 6.3<br>(6.2 to 6.3)    | Reference              |      |
|                                 | Male patient-male surgeon (concordant)     | 255,103<br>(12,925) | 6.7<br>(6.6 to 6.8)    | -0.5<br>(-1.4 to +0.5) | 0.31 |
|                                 | Male patient-female surgeon (discordant)   | 5,038<br>(661)      | 7.2<br>(6.3 to 8.1)    | Reference              |      |
| Laminectomy<br>or Spinal Fusion | Female patient-female surgeon (concordant) | 5,396<br>(353)      | 6.5<br>(5.8 to 7.3)    | -0.1<br>(-0.9 to +0.7) | 0.78 |
|                                 | Female patient-male surgeon (discordant)   | 215,670<br>(6,484)  | 6.6<br>(6.5 to 6.8)    | Reference              |      |
|                                 | Male patient-male surgeon (concordant)     | 183,895<br>(6,595)  | 7.1<br>(7.0 to 7.3)    | -0.6<br>(-1.5 to +0.3) | 0.18 |
|                                 | Male patient-female surgeon (discordant)   | 4,619<br>(375)      | 7.8<br>(6.9 to 8.7)    | Reference              |      |
| Colectomy                       | Female patient-female surgeon (concordant) | 20,893<br>(3,393)   | 10.1<br>(9.6 to 10.6)  | +0.1<br>(-0.4 to +0.7) | 0.66 |
|                                 | Female patient-male surgeon (discordant)   | 117,260<br>(13,923) | 10.0<br>(9.8 to 10.2)  | Reference              |      |
|                                 | Male patient-male surgeon (concordant)     | 82,924<br>(12,874)  | 11.0<br>(10.8 to 11.2) | +0.3<br>(-0.5 to +1.0) | 0.45 |

|                                |                                            |                    |                        |                         |       |
|--------------------------------|--------------------------------------------|--------------------|------------------------|-------------------------|-------|
|                                | Male patient-female surgeon (discordant)   | 11,644<br>(2,516)  | 10.7<br>(10.1 to 11.4) | Reference               |       |
| Cholecystectomy                | Female patient-female surgeon (concordant) | 11,185<br>(2,721)  | 9.6<br>(9.0 to 10.2)   | +0.4<br>(-0.3 to +1.1)  | 0.25  |
|                                | Female patient-male surgeon (discordant)   | 73,443<br>(12,185) | 9.2<br>(9.0 to 9.4)    | Reference               |       |
|                                | Male patient-male surgeon (concordant)     | 75,837<br>(12,011) | 9.9<br>(9.6 to 10.1)   | +0.3<br>(-0.4 to +1.0)  | 0.35  |
|                                | Male patient-female surgeon (discordant)   | 11,129<br>(2,557)  | 9.5<br>(8.9 to 10.2)   | Reference               |       |
| Coronary artery bypass surgery | Female patient-female surgeon (concordant) | 1,327<br>(144)     | 9.6<br>(7.5 to 11.6)   | -1.3<br>(-3.4 to +0.8)  | 0.23  |
|                                | Female patient-male surgeon (discordant)   | 39,753<br>(2,423)  | 10.9<br>(10.6 to 11.2) | Reference               |       |
|                                | Male patient-male surgeon (concordant)     | 113,709<br>(2,783) | 9.0<br>(8.8 to 9.2)    | +1.2<br>(+0.1 to +2.3)  | 0.036 |
|                                | Male patient-female surgeon (discordant)   | 3,940<br>(183)     | 7.8<br>(6.7 to 8.9)    | Reference               |       |
| Lung resection                 | Female patient-female surgeon (concordant) | 3,776<br>(246)     | 6.2<br>(5.0 to 7.3)    | -1.2<br>(-2.4 to +0.01) | 0.053 |

|                                  |                                            |                   |                        |                        |      |
|----------------------------------|--------------------------------------------|-------------------|------------------------|------------------------|------|
|                                  | Female patient-male surgeon (discordant)   | 41,125<br>(2,548) | 7.3<br>(7.1 to 7.6)    | Reference              |      |
|                                  | Male patient-male surgeon (concordant)     | 36,779<br>(2,712) | 8.9<br>(8.6 to 9.2)    | +1.1<br>(-0.4 to +2.6) | 0.14 |
|                                  | Male patient-female surgeon (discordant)   | 3,014<br>(243)    | 7.8<br>(6.4 to 9.2)    | Reference              |      |
| Abdominal aortic aneurysm repair | Female patient-female surgeon (concordant) | 947<br>(355)      | 9.3<br>(7.0 to 11.6)   | -1.5<br>(-3.9 to +0.8) | 0.20 |
|                                  | Female patient-male surgeon (discordant)   | 14,993<br>(3,248) | 10.8<br>(10.3 to 11.3) | Reference              |      |
|                                  | Male patient-male surgeon (concordant)     | 45,834<br>(4,005) | 8.3<br>(8.0 to 8.5)    | -0.7<br>(-1.9 to +0.6) | 0.29 |
|                                  | Male patient-female surgeon (discordant)   | 2,962<br>(452)    | 9.0<br>(7.8 to 10.2)   | Reference              |      |
| Appendectomy                     | Female patient-female surgeon (concordant) | 5,111<br>(2,203)  | 8.1<br>(7.2 to 9.1)    | -0.6<br>(-1.6 to +0.5) | 0.30 |
|                                  | Female patient-male surgeon (discordant)   | 24,149<br>(9,179) | 8.7<br>(8.3 to 9.1)    | Reference              |      |
|                                  | Male patient-male surgeon (concordant)     | 19,320<br>(8,456) | 9.0<br>(8.6 to 9.4)    | -0.2<br>(-1.6 to +1.1) | 0.75 |

|                 |                                            |                   |                        |                         |       |
|-----------------|--------------------------------------------|-------------------|------------------------|-------------------------|-------|
|                 | Male patient-female surgeon (discordant)   | 3,151<br>(1,630)  | 9.2<br>(8.0 to 10.4)   | Reference               |       |
| Cystectomy      | Female patient-female surgeon (concordant) | 306<br>(133)      | 17.8<br>(11.4 to 24.1) | -6.6<br>(-13.5 to +0.2) | 0.058 |
|                 | Female patient-male surgeon (discordant)   | 2,982<br>(1,130)  | 24.4<br>(22.8 to 26.0) | Reference               |       |
|                 | Male patient-male surgeon (concordant)     | 10,288<br>(1,943) | 23.4<br>(22.6 to 24.2) | +0.5<br>(-4.2 to +5.2)  | 0.84  |
|                 | Male patient-female surgeon (discordant)   | 611<br>(126)      | 22.9<br>(18.5 to 27.4) | Reference               |       |
| Thyroidectomy   | Female patient-female surgeon (concordant) | 410<br>(250)      | 5.3<br>(1.8 to 8.8)    | -1.0<br>(-5.1 to +3.1)  | 0.63  |
|                 | Female patient-male surgeon (discordant)   | 2,197<br>(1,257)  | 6.3<br>(5.2 to 7.4)    | Reference               |       |
|                 | Male patient-male surgeon (concordant)     | 1,393<br>(882)    | 9.4<br>(7.6 to 11.2)   | -3.1<br>(-10.4 to +4.1) | 0.40  |
|                 | Male patient-female surgeon (discordant)   | 246<br>(150)      | 12.5<br>(6.1 to 18.9)  | Reference               |       |
| Liver resection | Female patient-female surgeon (concordant) | 80<br>(58)        | 21.8<br>(9.0 to 34.6)  | +9.3<br>(-4.3 to +22.9) | 0.18  |

|               |                                            |                   |                        |                          |         |
|---------------|--------------------------------------------|-------------------|------------------------|--------------------------|---------|
|               | Female patient-male surgeon (discordant)   | 894<br>(462)      | 12.5<br>(10.1 to 14.9) | Reference                |         |
|               | Male patient-male surgeon (concordant)     | 1,150<br>(518)    | 14.2<br>(12.0 to 16.3) | -15.8<br>(-26.2 to -5.4) | 0.0029  |
|               | Male patient-female surgeon (discordant)   | 121<br>(62)       | 29.9<br>(20.2 to 39.7) | Reference                |         |
| Prostatectomy | Female patient-female surgeon (concordant) | N/A               | N/A                    | N/A                      | N/A     |
|               | Female patient-male surgeon (discordant)   | N/A               | N/A                    | Reference                |         |
|               | Male patient-male surgeon (concordant)     | 60,473<br>(5,478) | 8.4<br>(8.2 to 8.7)    | -2.4<br>(-4.3 to -0.4)   | 0.016   |
|               | Male patient-female surgeon (discordant)   | 1,835<br>(363)    | 10.8<br>(8.9 to 12.7)  | Reference                |         |
| Hysterectomy  | Female patient-female surgeon (concordant) | 17,341<br>(3,528) | 6.4<br>(6.0 to 6.9)    | -1.8<br>(-2.4 to -1.1)   | <0.0001 |
|               | Female patient-male surgeon (discordant)   | 28,993<br>(5,368) | 8.2<br>(7.8 to 8.5)    | Reference                |         |
|               | Male patient-male surgeon (concordant)     | N/A               | N/A                    | N/A                      | N/A     |

|  |                                                 |     |     |           |
|--|-------------------------------------------------|-----|-----|-----------|
|  | Male patient-<br>female surgeon<br>(discordant) | N/A | N/A | Reference |
|--|-------------------------------------------------|-----|-----|-----------|

Adjusted for patient characteristics (age, race and ethnicity, 27 chronic conditions, procedure type [for the analysis pooling the 14 procedure types], procedure electiveness, weekend versus weekday, month and year of surgery, and Medicaid coverage), surgeon characteristics (years of experience and operative volume), and hospital fixed effects (indicator variables for each hospital, effectively comparing patients treated at the same hospital).

Abbreviation: pp = percentage point.

**eTable 3. Association between patient-surgeon gender concordance and adjusted length-of-stay (LOS) (elective and non-elective procedures combined)**

|                             |                                                   | No. of patients<br>(No. of<br>surgeons) | Adjusted LOS, d<br>(95%CI) | Adjusted risk difference,<br>(95%CI) | P-value |
|-----------------------------|---------------------------------------------------|-----------------------------------------|----------------------------|--------------------------------------|---------|
| 14 procedures<br>(combined) | Female patient-<br>female surgeon<br>(concordant) | 87,620<br>(8,633)                       | 3.9<br>(3.9 to 4.0)        | -0.2<br>(-0.2 to -0.1)               | <0.0001 |
|                             | Female patient-<br>male surgeon<br>(discordant)   | 1,585,297<br>(44,455)                   | 4.1<br>(4.1 to 4.1)        | Reference                            |         |
|                             | Male patient-<br>male surgeon<br>(concordant)     | 1,221,972<br>(43,890)                   | 4.5<br>(4.5 to 4.5)        | +0.1<br>(+0.01 to +0.1)              | 0.029   |
|                             | Male patient-<br>female surgeon<br>(discordant)   | 53,900<br>(5,408)                       | 4.5<br>(4.4 to 4.5)        | Reference                            |         |
| Knee replacement            | Female patient-<br>female surgeon<br>(concordant) | 8,894<br>(379)                          | 2.6<br>(2.6 to 2.7)        | -0.01<br>(-0.1 to +0.04)             | 0.64    |
|                             | Female patient-<br>male surgeon<br>(discordant)   | 548,165<br>(10,676)                     | 2.6<br>(2.6 to 2.6)        | Reference                            |         |
|                             | Male patient-<br>male surgeon<br>(concordant)     | 317,905<br>(10,245)                     | 2.4<br>(2.4 to 2.4)        | -0.01<br>(-0.1 to +0.1)              | 0.74    |
|                             | Male patient-<br>female surgeon<br>(discordant)   | 4,549<br>(334)                          | 2.5<br>(2.4 to 2.5)        | Reference                            |         |
| Hip replacement             | Female patient-<br>female surgeon<br>(concordant) | 10,665<br>(801)                         | 3.7<br>(3.7 to 3.8)        | +0.1<br>(-0.02 to +0.1)              | 0.16    |



|                              |                                            |                     |                     |                          |        |
|------------------------------|--------------------------------------------|---------------------|---------------------|--------------------------|--------|
|                              | Female patient-male surgeon (discordant)   | 465,807<br>(14,219) | 3.7<br>(3.7 to 3.7) | Reference                |        |
|                              | Male patient-male surgeon (concordant)     | 260,632<br>(12,989) | 3.4<br>(3.4 to 3.4) | -0.1<br>(-0.2 to +0.1)   | 0.45   |
|                              | Male patient-female surgeon (discordant)   | 5,160<br>(666)      | 3.4<br>(3.3 to 3.6) | Reference                |        |
| Laminectomy or Spinal Fusion | Female patient-female surgeon (concordant) | 5,520<br>(358)      | 4.6<br>(4.4 to 4.7) | +0.1<br>(-0.1 to +0.3)   | 0.18   |
|                              | Female patient-male surgeon (discordant)   | 219,410<br>(6,509)  | 4.5<br>(4.5 to 4.5) | Reference                |        |
|                              | Male patient-male surgeon (concordant)     | 187,517<br>(6,631)  | 4.6<br>(4.5 to 4.6) | -0.3<br>(-0.5 to -0.1)   | 0.017  |
|                              | Male patient-female surgeon (discordant)   | 4,731<br>(383)      | 4.8<br>(4.6 to 5.0) | Reference                |        |
| Colectomy                    | Female patient-female surgeon (concordant) | 21,284<br>(3,427)   | 7.2<br>(7.1 to 7.3) | -0.3<br>(-0.4 to -0.1)   | 0.0001 |
|                              | Female patient-male surgeon (discordant)   | 119,267<br>(14,016) | 7.4<br>(7.4 to 7.5) | Reference                |        |
|                              | Male patient-male surgeon (concordant)     | 84,476<br>(12,963)  | 7.9<br>(7.9 to 8.0) | +0.2<br>(-0.003 to +0.4) | 0.054  |

|                                |                                            |                    |                       |                         |        |
|--------------------------------|--------------------------------------------|--------------------|-----------------------|-------------------------|--------|
|                                | Male patient-female surgeon (discordant)   | 11,891<br>(2,549)  | 7.7<br>(7.6 to 7.9)   | Reference               |        |
| Cholecystectomy                | Female patient-female surgeon (concordant) | 11,420<br>(2,754)  | 5.1<br>(5.0 to 5.2)   | -0.1<br>(-0.2 to +0.03) | 0.15   |
|                                | Female patient-male surgeon (discordant)   | 74,898<br>(12,265) | 5.2<br>(5.1 to 5.2)   | Reference               |        |
|                                | Male patient-male surgeon (concordant)     | 77,351<br>(12,085) | 5.6<br>(5.6 to 5.7)   | +0.1<br>(-0.1 to +0.2)  | 0.25   |
|                                | Male patient-female surgeon (discordant)   | 11,370<br>(2,572)  | 5.5<br>(5.4 to 5.7)   | Reference               |        |
| Coronary artery bypass surgery | Female patient-female surgeon (concordant) | 1,363<br>(146)     | 9.8<br>(9.3 to 10.2)  | -0.2<br>(-0.7 to +0.3)  | 0.36   |
|                                | Female patient-male surgeon (discordant)   | 40,494<br>(2,436)  | 10.0<br>(9.9 to 10.1) | Reference               |        |
|                                | Male patient-male surgeon (concordant)     | 115,980<br>(2,796) | 8.9<br>(8.8 to 8.9)   | +0.1<br>(-0.2 to +0.3)  | 0.68   |
|                                | Male patient-female surgeon (discordant)   | 4,024<br>(184)     | 8.8<br>(8.6 to 9.1)   | Reference               |        |
| Lung resection                 | Female patient-female surgeon (concordant) | 3,850<br>(247)     | 4.9<br>(4.7 to 5.1)   | -0.3<br>(-0.5 to -0.1)  | 0.0064 |

|                                  |                                            |                   |                     |                         |       |
|----------------------------------|--------------------------------------------|-------------------|---------------------|-------------------------|-------|
|                                  | Female patient-male surgeon (discordant)   | 41,820<br>(2,561) | 5.2<br>(5.1 to 5.2) | Reference               |       |
|                                  | Male patient-male surgeon (concordant)     | 37,449<br>(2,738) | 6.0<br>(6.0 to 6.1) | +0.1<br>(-0.3 to +0.4)  | 0.76  |
|                                  | Male patient-female surgeon (discordant)   | 3,072<br>(246)    | 6.0<br>(5.6 to 6.3) | Reference               |       |
| Abdominal aortic aneurysm repair | Female patient-female surgeon (concordant) | 970<br>(364)      | 5.0<br>(4.3 to 5.7) | -0.4<br>(-1.1 to +0.3)  | 0.26  |
|                                  | Female patient-male surgeon (discordant)   | 15,247<br>(3,258) | 5.4<br>(5.3 to 5.5) | Reference               |       |
|                                  | Male patient-male surgeon (concordant)     | 46,719<br>(4,026) | 3.9<br>(3.8 to 3.9) | +0.3<br>(-0.02 to +0.6) | 0.069 |
|                                  | Male patient-female surgeon (discordant)   | 3,036<br>(461)    | 3.6<br>(3.3 to 3.9) | Reference               |       |
| Appendectomy                     | Female patient-female surgeon (concordant) | 5,222<br>(2,237)  | 5.4<br>(5.3 to 5.6) | +0.02<br>(-0.2 to +0.2) | 0.83  |
|                                  | Female patient-male surgeon (discordant)   | 24,600<br>(9,277) | 5.4<br>(5.3 to 5.5) | Reference               |       |
|                                  | Male patient-male surgeon (concordant)     | 19,685<br>(8,530) | 6.0<br>(5.9 to 6.1) | +0.03<br>(-0.3 to +0.3) | 0.85  |

|                 |                                            |                   |                      |                        |       |
|-----------------|--------------------------------------------|-------------------|----------------------|------------------------|-------|
|                 | Male patient-female surgeon (discordant)   | 3,222<br>(1,657)  | 6.0<br>(5.7 to 6.2)  | Reference              |       |
| Cystectomy      | Female patient-female surgeon (concordant) | 312<br>(136)      | 9.0<br>(7.9 to 10.1) | -0.4<br>(-1.6 to +0.9) | 0.55  |
|                 | Female patient-male surgeon (discordant)   | 3,015<br>(1,135)  | 9.4<br>(9.1 to 9.7)  | Reference              |       |
|                 | Male patient-male surgeon (concordant)     | 10,455<br>(1,958) | 8.8<br>(8.6 to 8.9)  | -0.1<br>(-0.8 to +0.6) | 0.76  |
|                 | Male patient-female surgeon (discordant)   | 612<br>(127)      | 8.9<br>(8.2 to 9.6)  | Reference              |       |
| Thyroidectomy   | Female patient-female surgeon (concordant) | 419<br>(252)      | 2.4<br>(1.7 to 3.1)  | -0.6<br>(-1.5 to +0.2) | 0.13  |
|                 | Female patient-male surgeon (discordant)   | 2,240<br>(1,272)  | 3.1<br>(2.8 to 3.3)  | Reference              |       |
|                 | Male patient-male surgeon (concordant)     | 1,417<br>(899)    | 4.4<br>(4.0 to 4.8)  | +1.2<br>(-0.1 to +2.5) | 0.080 |
|                 | Male patient-female surgeon (discordant)   | 248<br>(149)      | 3.2<br>(2.1 to 4.4)  | Reference              |       |
| Liver resection | Female patient-female surgeon (concordant) | 80<br>(58)        | 7.9<br>(5.7 to 10.2) | -0.8<br>(-3.2 to +1.6) | 0.50  |

|               |                                            |                   |                      |                        |         |
|---------------|--------------------------------------------|-------------------|----------------------|------------------------|---------|
|               | Female patient-male surgeon (discordant)   | 905<br>(468)      | 8.8<br>(8.2 to 9.3)  | Reference              |         |
|               | Male patient-male surgeon (concordant)     | 1,176<br>(529)    | 9.6<br>(9.1 to 10.2) | +1.8<br>(-0.7 to +4.3) | 0.15    |
|               | Male patient-female surgeon (discordant)   | 123<br>(63)       | 7.8<br>(5.6 to 10.0) | Reference              |         |
| Prostatectomy | Female patient-female surgeon (concordant) | N/A               | N/A                  | N/A                    | N/A     |
|               | Female patient-male surgeon (discordant)   | N/A               | N/A                  | Reference              |         |
|               | Male patient-male surgeon (concordant)     | 61,210<br>(5,507) | 3.2<br>(3.2 to 3.2)  | -0.5<br>(-0.8 to -0.2) | 0.0003  |
|               | Male patient-female surgeon (discordant)   | 1,862<br>(368)    | 3.7<br>(3.4 to 4.0)  | Reference              |         |
| Hysterectomy  | Female patient-female surgeon (concordant) | 17,621<br>(3,572) | 3.3<br>(3.3 to 3.4)  | -0.8<br>(-0.9 to -0.7) | <0.0001 |
|               | Female patient-male surgeon (discordant)   | 29,429<br>(5,402) | 4.2<br>(4.1 to 4.2)  | Reference              |         |
|               | Male patient-male surgeon (concordant)     | N/A               | N/A                  | N/A                    | N/A     |

|  |                                                 |     |     |           |
|--|-------------------------------------------------|-----|-----|-----------|
|  | Male patient-<br>female surgeon<br>(discordant) | N/A | N/A | Reference |
|--|-------------------------------------------------|-----|-----|-----------|

Adjusted for patient characteristics (age, race and ethnicity, 27 chronic conditions, procedure type [for the analysis pooling the 14 procedure types], procedure electiveness, weekend versus weekday, month and year of surgery, and Medicaid coverage), surgeon characteristics (years of experience and operative volume), and hospital fixed effects (indicator variables for each hospital, effectively comparing patients treated at the same hospital).

Abbreviation: pp = percentage point.

**eTable 4 Association between patient-surgeon gender concordance and adjusted 30-day complication rates (elective and non-elective procedures combined)**

|                             |                                                   | No. of patients<br>(No. of<br>surgeons) | Adjusted complication<br>rate, % (95%CI) | Adjusted risk difference,<br>pp (95%CI) | P-value |
|-----------------------------|---------------------------------------------------|-----------------------------------------|------------------------------------------|-----------------------------------------|---------|
| 14 procedures<br>(combined) | Female patient-<br>female surgeon<br>(concordant) | 85,951<br>(8,550)                       | 7.4<br>(7.1 to 7.6)                      | -0.5<br>(-0.7 to -0.2)                  | 0.0001  |
|                             | Female patient-<br>male surgeon<br>(discordant)   | 1,559,937<br>(44,258)                   | 7.8<br>(7.8 to 7.9)                      | Reference                               |         |
|                             | Male patient-<br>male surgeon<br>(concordant)     | 1,199,732<br>(43,689)                   | 11.1<br>(11.0 to 11.1)                   | +0.2<br>(-0.1 to +0.5)                  | 0.22    |
|                             | Male patient-<br>female surgeon<br>(discordant)   | 52,797<br>(5,364)                       | 10.9<br>(10.6 to 11.2)                   | Reference                               |         |
| Knee replacement            | Female patient-<br>female surgeon<br>(concordant) | 8,775<br>(375)                          | 4.0<br>(3.5 to 4.5)                      | -0.1<br>(-0.7 to +0.4)                  | 0.63    |
|                             | Female patient-<br>male surgeon<br>(discordant)   | 541,655<br>(10,636)                     | 4.2<br>(4.1 to 4.2)                      | Reference                               |         |
|                             | Male patient-<br>male surgeon<br>(concordant)     | 313,027<br>(10,200)                     | 5.7<br>(5.6 to 5.8)                      | +0.3<br>(-0.6 to +1.1)                  | 0.54    |
|                             | Male patient-<br>female surgeon<br>(discordant)   | 4,487<br>(334)                          | 5.4<br>(4.6 to 6.2)                      | Reference                               |         |
| Hip replacement             | Female patient-<br>female surgeon<br>(concordant) | 10,404<br>(791)                         | 5.6<br>(5.0 to 6.1)                      | -0.1<br>(-0.7 to +0.4)                  | 0.64    |

|                              |                                            |                     |                        |                         |      |
|------------------------------|--------------------------------------------|---------------------|------------------------|-------------------------|------|
|                              | Female patient-male surgeon (discordant)   | 456,823<br>(14,155) | 5.7<br>(5.6 to 5.8)    |                         |      |
|                              | Male patient-male surgeon (concordant)     | 255,103<br>(12,925) | 7.5<br>(7.4 to 7.6)    | +0.1<br>(-0.9 to +1.1)  | 0.84 |
|                              | Male patient-female surgeon (discordant)   | 5,038<br>(661)      | 7.4<br>(6.4 to 8.3)    | Reference               |      |
| Laminectomy or Spinal Fusion | Female patient-female surgeon (concordant) | 5,396<br>(353)      | 7.7<br>(6.8 to 8.5)    | +0.05<br>(-0.8 to +0.9) | 0.91 |
|                              | Female patient-male surgeon (discordant)   | 215,670<br>(6,484)  | 7.6<br>(7.5 to 7.7)    | Reference               |      |
|                              | Male patient-male surgeon (concordant)     | 183,895<br>(6,595)  | 9.4<br>(9.3 to 9.5)    | -0.7<br>(-1.7 to +0.4)  | 0.21 |
|                              | Male patient-female surgeon (discordant)   | 4,619<br>(375)      | 10.1<br>(9.1 to 11.1)  | Reference               |      |
| Colectomy                    | Female patient-female surgeon (concordant) | 20,893<br>(3,393)   | 17.7<br>(17.1 to 18.3) | -0.5<br>(-1.2 to +0.2)  | 0.16 |
|                              | Female patient-male surgeon (discordant)   | 117,260<br>(13,923) | 18.2<br>(18.0 to 18.4) | Reference               |      |
|                              | Male patient-male surgeon (concordant)     | 82,924<br>(12,874)  | 21.8<br>(21.5 to 22.1) | +0.7<br>(-0.2 to +1.7)  | 0.14 |



|                                |                                            |                    |                        |                         |       |
|--------------------------------|--------------------------------------------|--------------------|------------------------|-------------------------|-------|
|                                | Male patient-female surgeon (discordant)   | 11,644<br>(2,516)  | 21.1<br>(20.2 to 22.0) | Reference               |       |
| Cholecystectomy                | Female patient-female surgeon (concordant) | 11,185<br>(2,721)  | 10.7<br>(10.1 to 11.4) | +0.1<br>(-0.6 to +0.8)  | 0.83  |
|                                | Female patient-male surgeon (discordant)   | 73,443<br>(12,185) | 10.7<br>(10.4 to 10.9) | Reference               |       |
|                                | Male patient-male surgeon (concordant)     | 75,837<br>(12,011) | 13.2<br>(13.0 to 13.4) | +0.2<br>(-0.5 to +1.0)  | 0.54  |
|                                | Male patient-female surgeon (discordant)   | 11,129<br>(2,557)  | 13.0<br>(12.3 to 13.7) | Reference               |       |
| Coronary artery bypass surgery | Female patient-female surgeon (concordant) | 1,327<br>(144)     | 17.4<br>(14.7 to 20.1) | -2.9<br>(-5.6 to -0.1)  | 0.042 |
|                                | Female patient-male surgeon (discordant)   | 39,753<br>(2,423)  | 20.3<br>(19.9 to 20.6) | Reference               |       |
|                                | Male patient-male surgeon (concordant)     | 113,709<br>(2,783) | 18.2<br>(17.9 to 18.4) | +1.6<br>(+0.04 to +3.1) | 0.044 |
|                                | Male patient-female surgeon (discordant)   | 3,940<br>(183)     | 16.6<br>(15.1 to 18.1) | Reference               |       |
| Lung resection                 | Female patient-female surgeon (concordant) | 3,776<br>(246)     | 9.4<br>(8.2 to 10.7)   | -1.2<br>(-2.5 to +0.2)  | 0.089 |

|                                  |                                            |                   |                        |                        |        |
|----------------------------------|--------------------------------------------|-------------------|------------------------|------------------------|--------|
|                                  | Female patient-male surgeon (discordant)   | 41,125<br>(2,548) | 10.6<br>(10.3 to 10.9) | Reference              |        |
|                                  | Male patient-male surgeon (concordant)     | 36,779<br>(2,712) | 15.4<br>(15.0 to 15.8) | +2.8<br>(+1.0 to +4.5) | 0.0017 |
|                                  | Male patient-female surgeon (discordant)   | 3,014<br>(243)    | 12.6<br>(11.0 to 14.3) | Reference              |        |
| Abdominal aortic aneurysm repair | Female patient-female surgeon (concordant) | 947<br>(355)      | 19.8<br>(16.5 to 23.0) | -2.1<br>(-5.5 to +1.3) | 0.23   |
|                                  | Female patient-male surgeon (discordant)   | 14,993<br>(3,248) | 21.9<br>(21.2 to 22.5) | Reference              |        |
|                                  | Male patient-male surgeon (concordant)     | 45,834<br>(4,005) | 15.7<br>(15.4 to 16.0) | +0.1<br>(-1.6 to +1.8) | 0.92   |
|                                  | Male patient-female surgeon (discordant)   | 2,962<br>(452)    | 15.6<br>(14.0 to 17.3) | Reference              |        |
| Appendectomy                     | Female patient-female surgeon (concordant) | 5,111<br>(2,203)  | 16.4<br>(15.2 to 17.6) | +0.5<br>(-0.8 to +1.9) | 0.45   |
|                                  | Female patient-male surgeon (discordant)   | 24,149<br>(9,179) | 15.9<br>(15.4 to 16.3) | Reference              |        |
|                                  | Male patient-male surgeon (concordant)     | 19,320<br>(8,456) | 20.6<br>(20.0 to 21.2) | -0.3<br>(-2.2 to +1.6) | 0.77   |

|                 |                                            |                   |                        |                          |      |
|-----------------|--------------------------------------------|-------------------|------------------------|--------------------------|------|
|                 | Male patient-female surgeon (discordant)   | 3,151<br>(1,630)  | 20.9<br>(19.2 to 22.6) | Reference                |      |
| Cystectomy      | Female patient-female surgeon (concordant) | 306<br>(133)      | 25.4<br>(18.1 to 32.7) | -5.7<br>(-13.5 to +2.2)  | 0.16 |
|                 | Female patient-male surgeon (discordant)   | 2,982<br>(1,130)  | 31.0<br>(29.3 to 32.7) | Reference                |      |
|                 | Male patient-male surgeon (concordant)     | 10,288<br>(1,943) | 34.3<br>(33.4 to 35.2) | -1.9<br>(-7.2 to +3.4)   | 0.48 |
|                 | Male patient-female surgeon (discordant)   | 611<br>(126)      | 36.2<br>(31.1 to 41.2) | Reference                |      |
| Thyroidectomy   | Female patient-female surgeon (concordant) | 410<br>(250)      | 10.6<br>(5.6 to 15.6)  | -1.5<br>(-7.3 to +4.4)   | 0.62 |
|                 | Female patient-male surgeon (discordant)   | 2,197<br>(1,257)  | 12.1<br>(10.6 to 13.6) | Reference                |      |
|                 | Male patient-male surgeon (concordant)     | 1,393<br>(882)    | 15.8<br>(13.7 to 18.0) | -2.3<br>(-10.6 to +6.0)  | 0.59 |
|                 | Male patient-female surgeon (discordant)   | 246<br>(150)      | 18.1<br>(10.9 to 25.4) | Reference                |      |
| Liver resection | Female patient-female surgeon (concordant) | 80<br>(58)        | 25.5<br>(12.2 to 38.8) | +3.5<br>(-10.7 to +17.8) | 0.63 |

|               |                                            |                   |                        |                         |         |
|---------------|--------------------------------------------|-------------------|------------------------|-------------------------|---------|
|               | Female patient-male surgeon (discordant)   | 894<br>(462)      | 22.0<br>(19.2 to 24.8) |                         |         |
|               | Male patient-male surgeon (concordant)     | 1,150<br>(518)    | 29.7<br>(26.8 to 32.5) | -5.1<br>(-18.8 to +8.7) | 0.47    |
|               | Male patient-female surgeon (discordant)   | 121<br>(62)       | 34.7<br>(22.0 to 47.4) | Reference               |         |
| Prostatectomy | Female patient-female surgeon (concordant) | N/A               | N/A                    | N/A                     | N/A     |
|               | Female patient-male surgeon (discordant)   | N/A               | N/A                    | Reference               |         |
|               | Male patient-male surgeon (concordant)     | 60,473<br>(5,478) | 11.6<br>(11.3 to 11.8) | -3.3<br>(-5.6 to -1.1)  | 0.0033  |
|               | Male patient-female surgeon (discordant)   | 1,835<br>(363)    | 14.9<br>(12.7 to 17.1) |                         |         |
| Hysterectomy  | Female patient-female surgeon (concordant) | 17,341<br>(3,528) | 10.2<br>(9.6 to 10.7)  | -2.4<br>(-3.2 to -1.6)  | <0.0001 |
|               | Female patient-male surgeon (discordant)   | 28,993<br>(5,368) | 12.6<br>(12.1 to 13.0) | Reference               |         |
|               | Male patient-male surgeon (concordant)     | N/A               | N/A                    | N/A                     | N/A     |

|  |                                                 |     |     |           |
|--|-------------------------------------------------|-----|-----|-----------|
|  | Male patient-<br>female surgeon<br>(discordant) | N/A | N/A | Reference |
|--|-------------------------------------------------|-----|-----|-----------|

Adjusted for patient characteristics (age, race and ethnicity, 27 chronic conditions, procedure type [for the analysis pooling the 14 procedure types], procedure electiveness, weekend versus weekday, month and year of surgery, and Medicaid coverage), surgeon characteristics (years of experience and operative volume), and hospital fixed effects (indicator variables for each hospital, effectively comparing patients treated at the same hospital).

Abbreviation: pp = percentage point.

**eTable 5. Association between patient-surgeon gender concordance and adjusted failure-to-rescue (FTR) rates (elective and non-elective procedures combined)**

|                             |                                                   | No. of patients<br>(No. of<br>surgeons) | Adjusted FTR rate, %<br>(95%CI) | Adjusted risk difference,<br>pp (95%CI) | P-value |
|-----------------------------|---------------------------------------------------|-----------------------------------------|---------------------------------|-----------------------------------------|---------|
| 14 procedures<br>(combined) | Female patient-<br>female surgeon<br>(concordant) | 5,645<br>(2,764)                        | 14.9<br>(13.9 to 16.0)          | -0.1<br>(-1.3 to +1.0)                  | 0.80    |
|                             | Female patient-<br>male surgeon<br>(discordant)   | 56,678<br>(22,653)                      | 15.1<br>(14.8 to 15.4)          | Reference                               |         |
|                             | Male patient-<br>male surgeon<br>(concordant)     | 67,500<br>(22,977)                      | 16.0<br>(15.8 to 16.3)          | +0.03<br>(-1.2 to +1.2)                 | 0.97    |
|                             | Male patient-<br>female surgeon<br>(discordant)   | 4,838<br>(2,392)                        | 16.0<br>(14.9 to 17.2)          | Reference                               |         |
| Knee replacement            | Female patient-<br>female surgeon<br>(concordant) | 82<br>(60)                              | 3.0<br>(-7.5 to 13.6)           | -2.1<br>(-12.8 to +8.7)                 | 0.71    |
|                             | Female patient-<br>male surgeon<br>(discordant)   | 4,837<br>(3,103)                        | 5.1<br>(4.5 to 5.7)             | Reference                               |         |
|                             | Male patient-<br>male surgeon<br>(concordant)     | 2,958<br>(2,203)                        | 7.3<br>(6.4 to 8.1)             | +3.1<br>(-3.3 to +9.6)                  | 0.34    |
|                             | Male patient-<br>female surgeon<br>(discordant)   | 45<br>(38)                              | 4.1<br>(-2.2 to 10.5)           | Reference                               |         |
| Hip replacement             | Female patient-<br>female surgeon<br>(concordant) | 418<br>(261)                            | 9.8<br>(6.0 to 13.7)            | +0.4<br>(-3.6 to +4.4)                  | 0.84    |

|                              |                                            |                   |                        |                        |      |
|------------------------------|--------------------------------------------|-------------------|------------------------|------------------------|------|
|                              | Female patient-male surgeon (discordant)   | 11,589<br>(6,262) | 9.4<br>(8.9 to 10.0)   | Reference              |      |
|                              | Male patient-male surgeon (concordant)     | 8,532<br>(5,238)  | 12.5<br>(11.8 to 13.2) | -0.4<br>(-5.3 to +4.4) | 0.86 |
|                              | Male patient-female surgeon (discordant)   | 298<br>(216)      | 13.0<br>(8.2 to 17.7)  | Reference              |      |
| Laminectomy or Spinal Fusion | Female patient-female surgeon (concordant) | 161<br>(103)      | 7.1<br>(1.1 to 13.0)   | +0.7<br>(-5.4 to +6.7) | 0.83 |
|                              | Female patient-male surgeon (discordant)   | 5,559<br>(2,794)  | 6.4<br>(5.8 to 7.0)    | Reference              |      |
|                              | Male patient-male surgeon (concordant)     | 6,370<br>(3,127)  | 11.8<br>(11.0 to 12.5) | +0.7<br>(-4.9 to +6.3) | 0.81 |
|                              | Male patient-female surgeon (discordant)   | 211<br>(141)      | 11.1<br>(5.6 to 16.5)  | Reference              |      |
| Colectomy                    | Female patient-female surgeon (concordant) | 2,608<br>(1,569)  | 19.7<br>(17.9 to 21.5) | -1.4<br>(-3.4 to +0.6) | 0.17 |
|                              | Female patient-male surgeon (discordant)   | 14,450<br>(7,526) | 21.1<br>(20.4 to 21.8) | Reference              |      |
|                              | Male patient-male surgeon (concordant)     | 12,802<br>(7,085) | 21.5<br>(20.7 to 22.2) | -1.3<br>(-3.8 to +1.2) | 0.31 |

|                                |                                            |                   |                        |                         |      |
|--------------------------------|--------------------------------------------|-------------------|------------------------|-------------------------|------|
|                                | Male patient-female surgeon (discordant)   | 1,913<br>(1,221)  | 22.7<br>(20.5 to 25.0) | Reference               |      |
| Cholecystectomy                | Female patient-female surgeon (concordant) | 705<br>(567)      | 12.7<br>(9.0 to 16.3)  | -1.8<br>(-5.9 to +2.2)  | 0.37 |
|                                | Female patient-male surgeon (discordant)   | 4,927<br>(3,511)  | 14.5<br>(13.5 to 15.5) | Reference               |      |
|                                | Male patient-male surgeon (concordant)     | 6,374<br>(4,111)  | 13.7<br>(12.8 to 14.6) | +2.1<br>(-1.2 to +5.5)  | 0.22 |
|                                | Male patient-female surgeon (discordant)   | 774<br>(606)      | 11.6<br>(8.5 to 14.7)  | Reference               |      |
| Coronary artery bypass surgery | Female patient-female surgeon (concordant) | 229<br>(105)      | 18.8<br>(12.1 to 25.4) | -1.3<br>(-8.1 to +5.5)  | 0.71 |
|                                | Female patient-male surgeon (discordant)   | 7,437<br>(1,937)  | 20.1<br>(19.2 to 20.9) | Reference               |      |
|                                | Male patient-male surgeon (concordant)     | 17,881<br>(2,320) | 13.2<br>(12.7 to 13.6) | +1.7<br>(-2.0 to +5.4)  | 0.37 |
|                                | Male patient-female surgeon (discordant)   | 548<br>(146)      | 11.5<br>(7.8 to 15.1)  | Reference               |      |
| Lung resection                 | Female patient-female surgeon (concordant) | 175<br>(85)       | 16.5<br>(8.8 to 24.1)  | +2.4<br>(-5.6 to +10.1) | 0.56 |



|                                  |                                            |                  |                        |                          |      |
|----------------------------------|--------------------------------------------|------------------|------------------------|--------------------------|------|
|                                  | Female patient-male surgeon (discordant)   | 2,371<br>(1,145) | 14.1<br>(12.7 to 15.5) | Reference                |      |
|                                  | Male patient-male surgeon (concordant)     | 3,380<br>(1,465) | 17.9<br>(16.6 to 19.2) | +2.4<br>(-5.4 to +10.2)  | 0.54 |
|                                  | Male patient-female surgeon (discordant)   | 224<br>(120)     | 15.5<br>(8.1 to 22.9)  | Reference                |      |
| Abdominal aortic aneurysm repair | Female patient-female surgeon (concordant) | 182<br>(138)     | 42.1<br>(31.8 to 52.3) | +5.1<br>(-5.8 to +16.1)  | 0.36 |
|                                  | Female patient-male surgeon (discordant)   | 2,039<br>(1,362) | 37.0<br>(34.8 to 39.1) | Reference                |      |
|                                  | Male patient-male surgeon (concordant)     | 4,134<br>(2,085) | 33.4<br>(32.0 to 34.9) | -4.1<br>(-10.9 to +2.6)  | 0.23 |
|                                  | Male patient-female surgeon (discordant)   | 343<br>(213)     | 37.6<br>(31.2 to 44.0) | Reference                |      |
| Appendectomy                     | Female patient-female surgeon (concordant) | 344<br>(309)     | 15.2<br>(9.3 to 21.1)  | +3.4<br>(-3.7 to +10.4)  | 0.35 |
|                                  | Female patient-male surgeon (discordant)   | 1,604<br>(1,388) | 11.8<br>(10.0 to 13.7) | Reference                |      |
|                                  | Male patient-male surgeon (concordant)     | 1,798<br>(1,570) | 14.9<br>(12.8 to 17.0) | -0.7<br>(-12.2 to +10.7) | 0.90 |

|               |                                            |                  |                         |                          |      |
|---------------|--------------------------------------------|------------------|-------------------------|--------------------------|------|
|               | Male patient-female surgeon (discordant)   | 270<br>(239)     | 15.6<br>(5.5 to 25.8)   | Reference                |      |
| Cystectomy    | Female patient-female surgeon (concordant) | 27<br>(25)       | 13.1<br>(-20.6 to 46.7) | -1.0<br>(-37.0 to +35.0) | 0.96 |
|               | Female patient-male surgeon (discordant)   | 366<br>(305)     | 14.1<br>(9.8 to 18.3)   | Reference                |      |
|               | Male patient-male surgeon (concordant)     | 1,141<br>(676)   | 15.7<br>(13.5 to 18.0)  | +2.9<br>(-11.0 to +16.8) | 0.68 |
|               | Male patient-female surgeon (discordant)   | 81<br>(46)       | 12.9<br>(-0.2 to 26.0)  | Reference                |      |
| Prostatectomy | Female patient-female surgeon (concordant) | N/A              | N/A                     | N/A                      | N/A  |
|               | Female patient-male surgeon (discordant)   | N/A              | N/A                     | Reference                |      |
|               | Male patient-male surgeon (concordant)     | 1,861<br>(1,198) | 11.6<br>(10.1 to 13.1)  | -1.4<br>(-15.2 to +12.3) | 0.84 |
|               | Male patient-female surgeon (discordant)   | 100<br>(62)      | 13.0<br>(-0.2 to 26.2)  | Reference                |      |
| Hysterectomy  | Female patient-female surgeon (concordant) | 691<br>(424)     | 10.9<br>(7.7 to 14.0)   | +1.5<br>(-2.9 to +5.9)   | 0.49 |

|  |                                          |             |                   |           |     |
|--|------------------------------------------|-------------|-------------------|-----------|-----|
|  | Female patient-male surgeon (discordant) | 1,307 (778) | 9.3 (7.4 to 11.2) | Reference |     |
|  | Male patient-male surgeon (concordant)   | N/A         | N/A               | N/A       | N/A |
|  | Male patient-female surgeon (discordant) | N/A         | N/A               | Reference |     |

Adjusted for patient characteristics (age, race and ethnicity, 27 chronic conditions, procedure type [for the analysis pooling the 14 procedure types], procedure electiveness, weekend versus weekday, month and year of surgery, and Medicaid coverage), surgeon characteristics (years of experience and operative volume), and hospital fixed effects (indicator variables for each hospital, effectively comparing patients treated at the same hospital).

Thyroidectomy and liver resection were removed as the estimate did not converge due to the small sample size.

Abbreviation: pp = percentage point.

**eTable 6. Comparison of patient adjusted 30-day mortality rates between female versus male patients, non-elective surgical procedures**

|                                 |                | No. of patients<br>(No. of surgeons) | Adjusted mortality<br>rate, % (95%CI) | Adjusted risk difference,<br>pp (95%CI) | P-value |
|---------------------------------|----------------|--------------------------------------|---------------------------------------|-----------------------------------------|---------|
| 12 procedures<br>(combined)     | Female patient | 345,985<br>(39,266)                  | 4.9<br>(4.9 to 5.0)                   | -1.0<br>(-1.2 to -0.8)                  | <0.0001 |
|                                 | Male patient   | 263,105<br>(38,841)                  | 5.9<br>(5.8 to 6.0)                   | Reference                               |         |
| Knee replacement                | Female patient | 20,920<br>(3,779)                    | 0.7<br>(0.6 to 0.8)                   | -0.1<br>(-0.3 to +0.1)                  | 0.25    |
|                                 | Male patient   | 11,960<br>(2,836)                    | 0.8<br>(0.7 to 1.0)                   | Reference                               |         |
| Hip replacement                 | Female patient | 151,650<br>(13,975)                  | 4.6<br>(4.5 to 4.7)                   | -2.9<br>(-3.3 to -2.6)                  | <0.0001 |
|                                 | Male patient   | 65,824<br>(12,164)                   | 7.5<br>(7.2 to 7.8)                   | Reference                               |         |
| Laminectomy<br>or Spinal Fusion | Female patient | 21,110<br>(4,538)                    | 2.5<br>(2.2 to 2.8)                   | -1.6<br>(-2.1 to -1.0)                  | <0.0001 |
|                                 | Male patient   | 21,925<br>(4,793)                    | 4.1<br>(3.7 to 4.4)                   | Reference                               |         |
| Colectomy                       | Female patient | 44,521<br>(13,012)                   | 13.3<br>(12.9 to 13.7)                | -1.5<br>(-2.3 to -0.7)                  | 0.0003  |

|                                     |                |                    |                        |                        |         |
|-------------------------------------|----------------|--------------------|------------------------|------------------------|---------|
|                                     | Male patient   | 29,754<br>(11,224) | 14.8<br>(14.2 to 15.3) | Reference              |         |
| Cholecystectomy                     | Female patient | 63,920<br>(12,795) | 2.4<br>(2.2 to 2.5)    | -0.1<br>(-0.3 to +0.2) | 0.52    |
|                                     | Male patient   | 65,628<br>(12,731) | 2.4<br>(2.3 to 2.6)    | Reference              |         |
| Coronary artery bypass<br>surgery   | Female patient | 12,711<br>(2,130)  | 6.1<br>(5.6 to 6.6)    | +2.2<br>(+1.7 to +2.8) | <0.0001 |
|                                     | Male patient   | 32,308<br>(2,420)  | 3.9<br>(3.7 to 4.1)    | Reference              |         |
| Lung resection                      | Female patient | 2,361<br>(1,071)   | 5.9<br>(4.5 to 7.3)    | -2.5<br>(-4.7 to +0.2) | 0.067   |
|                                     | Male patient   | 2,910<br>(1,346)   | 8.1<br>(6.9 to 9.4)    | Reference              |         |
| Abdominal aortic<br>aneurysm repair | Female patient | 3,295<br>(1,832)   | 17.9<br>(16.0 to 19.8) | +1.1<br>(-1.4 to +3.7) | 0.37    |
|                                     | Male patient   | 8,610<br>(2,900)   | 16.8<br>(15.8 to 17.7) | Reference              |         |
| Appendectomy                        | Female patient | 20,783<br>(9,235)  | 2.5<br>(2.2 to 2.8)    | +0.1<br>(-0.4 to +0.7) | 0.68    |

|                 |                |                   |                        |                          |      |
|-----------------|----------------|-------------------|------------------------|--------------------------|------|
|                 | Male patient   | 18,201<br>(8,615) | 2.4<br>(2.1 to 2.7)    | Reference                |      |
| Cystectomy      | Female patient | 174<br>(138)      | 2.3<br>(-6.2 to 10.7)  | -4.4<br>(-15.5 to +6.7)  | 0.44 |
|                 | Male patient   | 559<br>(336)      | 6.6<br>(3.5 to 9.7)    | Reference                |      |
| Liver resection | Female patient | 83<br>(65)        | 6.7<br>(-19.7 to 33.0) | -4.6<br>(-46.9 to +37.7) | 0.82 |
|                 | Male patient   | 137<br>(100)      | 11.3<br>(-5.2 to 27.8) | Reference                |      |

Adjusted for patient characteristics (age, race and ethnicity, 27 chronic conditions, procedure type [for the analysis pooling the 12 procedure types], weekend versus weekday, month and year of surgery, and Medicaid coverage), surgeon fixed effects (indicator variables for each hospital, effectively comparing patients treated at the same hospital), and hospital fixed effects (indicator variables for each surgeon, effectively comparing patients treated by the same surgeon).

Thyroidectomy was removed as the estimate did not converge due to the small sample size.

Abbreviation: pp = percentage point.

**eTable 7. Comparison of patient adjusted 30-day mortality rates between female versus male patients, elective surgical procedures**

|                                 |                | No. of patients<br>(No. of surgeons) | Adjusted mortality<br>rate, % (95%CI) | Adjusted risk difference,<br>pp (95%CI) | P-value |
|---------------------------------|----------------|--------------------------------------|---------------------------------------|-----------------------------------------|---------|
| 12 procedures<br>(combined)     | Female patient | 1,302,115<br>(44,436)                | 0.7<br>(0.7 to 0.7)                   | -0.1<br>(-0.1 to -0.1)                  | <0.0001 |
|                                 | Male patient   | 991,551<br>(40,998)                  | 0.8<br>(0.8 to 0.8)                   | Reference                               |         |
| Knee replacement                | Female patient | 529,641<br>(10,723)                  | 0.1<br>(0.1 to 0.2)                   | -0.1<br>(-0.1 to -0.03)                 | <0.0001 |
|                                 | Male patient   | 305,647<br>(10,279)                  | 0.2<br>(0.2 to 0.2)                   | Reference                               |         |
| Hip replacement                 | Female patient | 316,243<br>(9,716)                   | 0.3<br>(0.3 to 0.3)                   | -0.1<br>(-0.1 to -0.03)                 | 0.0005  |
|                                 | Male patient   | 194,618<br>(8,871)                   | 0.4<br>(0.3 to 0.4)                   | Reference                               |         |
| Laminectomy<br>or Spinal Fusion | Female patient | 200,300<br>(6,470)                   | 0.3<br>(0.3 to 0.4)                   | -0.3<br>(-0.4 to -0.2)                  | <0.0001 |
|                                 | Male patient   | 166,942<br>(6,508)                   | 0.6<br>(0.6 to 0.7)                   | Reference                               |         |
| Colectomy                       | Female patient | 94,064<br>(13,470)                   | 2.0<br>(1.8 to 2.1)                   | -0.8<br>(-1.0 to -0.6)                  | <0.0001 |

|                                     |                |                    |                     |                        |         |
|-------------------------------------|----------------|--------------------|---------------------|------------------------|---------|
|                                     | Male patient   | 65,151<br>(11,643) | 2.7<br>(2.6 to 2.9) | Reference              |         |
| Cholecystectomy                     | Female patient | 20,881<br>(8,039)  | 2.5<br>(2.1 to 2.8) | -0.6<br>(-1.1 to -0.1) | 0.033   |
|                                     | Male patient   | 21,572<br>(7,694)  | 3.0<br>(2.7 to 3.4) | Reference              |         |
| Coronary artery bypass<br>surgery   | Female patient | 28,586<br>(2,417)  | 3.7<br>(3.4 to 3.9) | +1.3<br>(+1.0 to +1.6) | <0.0001 |
|                                     | Male patient   | 85,804<br>(2,801)  | 2.4<br>(2.3 to 2.5) | Reference              |         |
| Lung resection                      | Female patient | 42,610<br>(2,571)  | 1.4<br>(1.3 to 1.5) | -0.8<br>(-1.1 to -0.6) | <0.0001 |
|                                     | Male patient   | 36,980<br>(2,676)  | 2.2<br>(2.0 to 2.4) | Reference              |         |
| Abdominal aortic<br>aneurysm repair | Female patient | 12,680<br>(3,201)  | 4.0<br>(3.5 to 4.4) | +2.0<br>(+1.5 to +2.4) | <0.0001 |
|                                     | Male patient   | 40,257<br>(4,038)  | 2.0<br>(1.9 to 2.2) | Reference              |         |
| Appendectomy                        | Female patient | 8,559<br>(4,228)   | 1.5<br>(1.1 to 2.0) | -1.1<br>(-2.5 to +0.3) | 0.13    |



|                 |                |                   |                      |                        |      |
|-----------------|----------------|-------------------|----------------------|------------------------|------|
|                 | Male patient   | 4,344<br>(3,036)  | 2.6<br>(1.7 to 3.6)  | Reference              |      |
| Cystectomy      | Female patient | 3,126<br>(1,204)  | 2.4<br>(1.6 to 3.2)  | -0.5<br>(-1.6 to +0.5) | 0.31 |
|                 | Male patient   | 10,377<br>(1,976) | 2.9<br>(2.5 to 3.3)  | Reference              |      |
| Thyroidectomy   | Female patient | 2,373<br>(1,399)  | 0.6<br>(-0.2 to 1.3) | -0.9<br>(-2.8 to +1.0) | 0.36 |
|                 | Male patient   | 1,514<br>(973)    | 1.4<br>(0.2 to 2.6)  | Reference              |      |
| Liver resection | Female patient | 894<br>(485)      | 4.6<br>(2.4 to 6.7)  | -0.1<br>(-3.5 to +3.4) | 0.97 |
|                 | Male patient   | 1,140<br>(536)    | 4.6<br>(3.0 to 6.3)  | Reference              |      |

Adjusted for patient characteristics (age, race and ethnicity, 27 chronic conditions, procedure type [for the analysis pooling the 12 procedure types], weekend versus weekday, month and year of surgery, and Medicaid coverage), surgeon fixed effects (indicator variables for each hospital, effectively comparing patients treated at the same hospital), and hospital fixed effects (indicator variables for each surgeon, effectively comparing patients treated by the same surgeon).

Abbreviation: pp = percentage point.

**eTable 8. Association between patient-surgeon gender concordance and patient adjusted 30-day mortality rates, using hospital random effects instead of hospital fixed effects (elective and non-elective procedures combined)**

|                             |                                            | No. of patients<br>(No. of surgeons) | Adjusted mortality rate, % (95%CI) | Adjusted risk difference, pp (95%CI) | P-value |
|-----------------------------|--------------------------------------------|--------------------------------------|------------------------------------|--------------------------------------|---------|
| 14 procedures<br>(combined) | Female patient-female surgeon (concordant) | 86,133<br>(8,556)                    | 1.3<br>(1.1 to 1.4)                | -0.2<br>(-0.3 to -0.01)              | 0.039   |
|                             | Female patient-male surgeon (discordant)   | 1,561,967<br>(44,295)                | 1.4<br>(1.4 to 1.5)                | Reference                            |         |
|                             | Male patient-male surgeon (concordant)     | 1,201,712<br>(43,723)                | 2.0<br>(2.0 to 2.1)                | +0.3<br>(+0.1 to +0.4)               | 0.0044  |
|                             | Male patient-female surgeon (discordant)   | 52,944<br>(5,371)                    | 1.8<br>(1.6 to 1.9)                | Reference                            |         |
| Knee replacement            | Female patient-female surgeon (concordant) | 8,775<br>(375)                       | 0.2<br>(0.1 to 0.3)                | +0.003<br>(-0.1 to +0.1)             | 0.95    |
|                             | Female patient-male surgeon (discordant)   | 541,786<br>(10,639)                  | 0.2<br>(0.1 to 0.2)                | Reference                            |         |
|                             | Male patient-male surgeon (concordant)     | 313,120<br>(10,202)                  | 0.3<br>(0.2 to 0.3)                | +0.1<br>(-0.03 to +0.3)              | 0.11    |
|                             | Male patient-female surgeon (discordant)   | 4,487<br>(334)                       | 0.1<br>(-0.005 to 0.3)             | Reference                            |         |
| Hip replacement             | Female patient-female surgeon (concordant) | 10,421<br>(792)                      | 1.7<br>(1.4 to 1.9)                | +0.03<br>(-0.3 to +0.3)              | 0.87    |

|                              |                                            |                     |                     |                         |        |
|------------------------------|--------------------------------------------|---------------------|---------------------|-------------------------|--------|
|                              | Female patient-male surgeon (discordant)   | 457,472<br>(14,164) | 1.6<br>(1.6 to 1.7) | Reference               |        |
|                              | Male patient-male surgeon (concordant)     | 255,394<br>(12,932) | 2.3<br>(2.3 to 2.4) | +0.3<br>(-0.4 to +0.9)  | 0.46   |
|                              | Male patient-female surgeon (discordant)   | 5,048<br>(661)      | 2.1<br>(1.4 to 2.7) | Reference               |        |
| Laminectomy or Spinal Fusion | Female patient-female surgeon (concordant) | 5,417<br>(354)      | 0.5<br>(0.3 to 0.7) | +0.01<br>(-0.2 to +0.2) | 0.92   |
|                              | Female patient-male surgeon (discordant)   | 215,993<br>(6,486)  | 0.5<br>(0.5 to 0.5) | Reference               |        |
|                              | Male patient-male surgeon (concordant)     | 184,234<br>(6,602)  | 1.0<br>(1.0 to 1.1) | -0.3<br>(-0.6 to +0.1)  | 0.18   |
|                              | Male patient-female surgeon (discordant)   | 4,633<br>(377)      | 1.3<br>(0.9 to 1.7) | Reference               |        |
| Colectomy                    | Female patient-female surgeon (concordant) | 20,956<br>(3,400)   | 4.9<br>(4.6 to 5.3) | -0.6<br>(-1.0 to -0.2)  | 0.0018 |
|                              | Female patient-male surgeon (discordant)   | 117,629<br>(13,956) | 5.5<br>(5.3 to 5.7) | Reference               |        |
|                              | Male patient-male surgeon (concordant)     | 83,210<br>(12,908)  | 6.5<br>(6.3 to 6.7) | +0.5<br>(-0.1 to +1.0)  | 0.082  |

|                                |                                            |                    |                     |                        |         |
|--------------------------------|--------------------------------------------|--------------------|---------------------|------------------------|---------|
|                                | Male patient-female surgeon (discordant)   | 11,695<br>(2,525)  | 6.0<br>(5.6 to 6.5) | Reference              |         |
| Cholecystectomy                | Female patient-female surgeon (concordant) | 11,213<br>(2,721)  | 2.2<br>(1.9 to 2.5) | -0.3<br>(-0.5 to +0.1) | 0.10    |
|                                | Female patient-male surgeon (discordant)   | 73,588<br>(12,189) | 2.5<br>(2.3 to 2.6) | Reference              |         |
|                                | Male patient-male surgeon (concordant)     | 76,041<br>(12,029) | 2.6<br>(2.5 to 2.8) | +0.6<br>(+0.3 to +0.9) | <0.0001 |
|                                | Male patient-female surgeon (discordant)   | 11,159<br>(2,557)  | 2.0<br>(1.7 to 2.3) | Reference              |         |
| Coronary artery bypass surgery | Female patient-female surgeon (concordant) | 1,341<br>(145)     | 4.7<br>(3.4 to 6.0) | -0.1<br>(-1.5 to +1.2) | 0.85    |
|                                | Female patient-male surgeon (discordant)   | 39,956<br>(2,426)  | 4.8<br>(4.6 to 5.1) | Reference              |         |
|                                | Male patient-male surgeon (concordant)     | 114,158<br>(2,790) | 2.9<br>(2.8 to 3.0) | +0.1<br>(-0.5 to +0.7) | 0.69    |
|                                | Male patient-female surgeon (discordant)   | 3,954<br>(183)     | 2.8<br>(2.2 to 3.4) | Reference              |         |
| Lung resection                 | Female patient-female surgeon (concordant) | 3,783<br>(246)     | 1.7<br>(1.2 to 2.3) | -0.1<br>(-0.6 to +0.5) | 0.74    |

|                                  |                                            |                   |                     |                        |      |
|----------------------------------|--------------------------------------------|-------------------|---------------------|------------------------|------|
|                                  | Female patient-male surgeon (discordant)   | 41,188<br>(2,551) | 1.8<br>(1.6 to 2.1) | Reference              |      |
|                                  | Male patient-male surgeon (concordant)     | 36,870<br>(2,715) | 3.2<br>(2.8 to 3.5) | +0.1<br>(-0.6 to +0.7) | 0.87 |
|                                  | Male patient-female surgeon (discordant)   | 3,020<br>(243)    | 3.1<br>(2.4 to 3.8) | Reference              |      |
| Abdominal aortic aneurysm repair | Female patient-female surgeon (concordant) | 950<br>(356)      | 7.9<br>(6.0 to 9.9) | +0.5<br>(-1.5 to +2.6) | 0.61 |
|                                  | Female patient-male surgeon (discordant)   | 15,025<br>(3,251) | 7.4<br>(6.9 to 7.9) | Reference              |      |
|                                  | Male patient-male surgeon (concordant)     | 45,897<br>(4,009) | 4.4<br>(4.1 to 4.7) | -0.3<br>(-1.2 to +0.7) | 0.58 |
|                                  | Male patient-female surgeon (discordant)   | 2,970<br>(455)    | 4.7<br>(3.8 to 5.6) | Reference              |      |
| Appendectomy                     | Female patient-female surgeon (concordant) | 5,126<br>(2,209)  | 2.2<br>(1.8 to 2.6) | +0.2<br>(-0.2 to +0.6) | 0.39 |
|                                  | Female patient-male surgeon (discordant)   | 24,216<br>(9,195) | 2.0<br>(1.8 to 2.2) | Reference              |      |
|                                  | Male patient-male surgeon (concordant)     | 19,384<br>(8,466) | 2.8<br>(2.6 to 3.0) | -0.1<br>(-0.8 to +0.5) | 0.70 |

|                 |                                            |                   |                      |                         |       |
|-----------------|--------------------------------------------|-------------------|----------------------|-------------------------|-------|
|                 | Male patient-female surgeon (discordant)   | 3,161<br>(1,633)  | 2.9<br>(2.3 to 3.5)  | Reference               |       |
| Cystectomy      | Female patient-female surgeon (concordant) | 306<br>(133)      | 2.1<br>(0.5 to 3.7)  | -1.4<br>(-2.9 to +0.02) | 0.054 |
|                 | Female patient-male surgeon (discordant)   | 2,994<br>(1,133)  | 3.6<br>(2.7 to 4.5)  | Reference               |       |
|                 | Male patient-male surgeon (concordant)     | 10,324<br>(1,945) | 4.0<br>(3.4 to 4.6)  | +0.7<br>(-0.8 to +2.2)  | 0.34  |
|                 | Male patient-female surgeon (discordant)   | 612<br>(127)      | 3.3<br>(1.7 to 4.8)  | Reference               |       |
| Thyroidectomy   | Female patient-female surgeon (concordant) | 410<br>(250)      | 0.7<br>(-0.2 to 1.6) | -0.1<br>(-1.0 to +0.7)  | 0.78  |
|                 | Female patient-male surgeon (discordant)   | 2,198<br>(1,258)  | 0.8<br>(0.4 to 1.3)  | Reference               |       |
|                 | Male patient-male surgeon (concordant)     | 1,398<br>(886)    | 1.5<br>(0.9 to 2.1)  | -0.4<br>(-2.1 to +1.2)  | 0.60  |
|                 | Male patient-female surgeon (discordant)   | 246<br>(150)      | 1.9<br>(0.4 to 3.4)  | Reference               |       |
| Liver resection | Female patient-female surgeon (concordant) | 80<br>(58)        | 6.5<br>(0.7 to 12.2) | +1.9<br>(-4.2 to +7.9)  | 0.54  |

|               |                                            |                   |                      |                         |      |
|---------------|--------------------------------------------|-------------------|----------------------|-------------------------|------|
|               | Female patient-male surgeon (discordant)   | 897<br>(464)      | 4.6<br>(3.1 to 6.1)  | Reference               |      |
|               | Male patient-male surgeon (concordant)     | 1,156<br>(522)    | 6.3<br>(4.5 to 8.1)  | +3.2<br>(-1.0 to +7.4)  | 0.13 |
|               | Male patient-female surgeon (discordant)   | 121<br>(62)       | 3.1<br>(-0.9 to 7.2) | Reference               |      |
| Prostatectomy | Female patient-female surgeon (concordant) | N/A               | N/A                  | N/A                     | N/A  |
|               | Female patient-male surgeon (discordant)   | N/A               | N/A                  | Reference               |      |
|               | Male patient-male surgeon (concordant)     | 60,526<br>(5,479) | 1.0<br>(0.8 to 1.1)  | +0.3<br>(-0.3 to +0.9)  | 0.28 |
|               | Male patient-female surgeon (discordant)   | 1,838<br>(365)    | 0.7<br>(0.1 to 1.2)  | Reference               |      |
| Hysterectomy  | Female patient-female surgeon (concordant) | 17,355<br>(3,533) | 0.9<br>(0.7 to 1.0)  | -0.2<br>(-0.4 to +0.03) | 0.10 |
|               | Female patient-male surgeon (discordant)   | 29,025<br>(5,372) | 1.0<br>(0.9 to 1.2)  | Reference               |      |
|               | Male patient-male surgeon (concordant)     | N/A               | N/A                  | N/A                     | N/A  |

|  |                                                 |     |     |           |
|--|-------------------------------------------------|-----|-----|-----------|
|  | Male patient-<br>female surgeon<br>(discordant) | N/A | N/A | Reference |
|--|-------------------------------------------------|-----|-----|-----------|

Adjusted for patient characteristics (age, race and ethnicity, 27 chronic conditions, procedure type [for the analysis pooling the 14 procedure types], procedure electiveness, weekend versus weekday, month and year of surgery, and Medicaid coverage), surgeon characteristics (years of experience and operative volume), and hospital random effects.

Abbreviation: pp = percentage point.



**eTable 9. Association between patient-surgeon gender concordance and patient adjusted 30-day mortality rates for hospitals where at least 1 surgical procedure performed by a female surgeon (elective and non-elective procedures combined)**

|                             |                                                   | No. of patients<br>(No. of<br>surgeons) | Adjusted mortality<br>rate, % (95%CI) | Adjusted risk difference,<br>pp (95%CI) | P-value |
|-----------------------------|---------------------------------------------------|-----------------------------------------|---------------------------------------|-----------------------------------------|---------|
| 14 procedures<br>(combined) | Female patient-<br>female surgeon<br>(concordant) | 86,133<br>(8,556)                       | 1.4<br>(1.3 to 1.5)                   | -0.1<br>(-0.3 to -0.02)                 | 0.025   |
|                             | Female patient-<br>male surgeon<br>(discordant)   | 1,416,863<br>(41,862)                   | 1.5<br>(1.5 to 1.5)                   | Reference                               |         |
|                             | Male patient-<br>male surgeon<br>(concordant)     | 1,104,295<br>(41,429)                   | 2.1<br>(2.0 to 2.1)                   | +0.3<br>(+0.1 to +0.5)                  | 0.0006  |
|                             | Male patient-<br>female surgeon<br>(discordant)   | 52,944<br>(5,371)                       | 1.8<br>(1.6 to 1.9)                   | Reference                               |         |
| Knee replacement            | Female patient-<br>female surgeon<br>(concordant) | 8,775<br>(375)                          | 0.2<br>(0.1 to 0.3)                   | +0.03<br>(-0.1 to +0.1)                 | 0.67    |
|                             | Female patient-<br>male surgeon<br>(discordant)   | 474,551<br>(9,764)                      | 0.2<br>(0.1 to 0.2)                   | Reference                               |         |
|                             | Male patient-<br>male surgeon<br>(concordant)     | 274,034<br>(9,325)                      | 0.3<br>(0.2 to 0.3)                   | +0.1<br>(-0.03 to +0.3)                 | 0.10    |
|                             | Male patient-<br>female surgeon<br>(discordant)   | 4,487<br>(334)                          | 0.1<br>(-0.05 to 0.3)                 | Reference                               |         |
| Hip replacement             | Female patient-<br>female surgeon<br>(concordant) | 10,421<br>(792)                         | 1.8<br>(1.5 to 2.2)                   | +0.2<br>(-0.2 to +0.6)                  | 0.35    |

|                              |                                            |                     |                     |                           |        |
|------------------------------|--------------------------------------------|---------------------|---------------------|---------------------------|--------|
|                              | Female patient-male surgeon (discordant)   | 415,093<br>(13,314) | 1.7<br>(1.6 to 1.7) | Reference                 |        |
|                              | Male patient-male surgeon (concordant)     | 231,726<br>(12,080) | 2.3<br>(2.3 to 2.4) | +0.3<br>(-0.4 to +0.9)    | 0.40   |
|                              | Male patient-female surgeon (discordant)   | 5,048<br>(661)      | 2.0<br>(1.4 to 2.7) | Reference                 |        |
| Laminectomy or Spinal Fusion | Female patient-female surgeon (concordant) | 5,417<br>(354)      | 0.4<br>(0.2 to 0.7) | -0.1<br>(-0.3 to +0.2)    | 0.58   |
|                              | Female patient-male surgeon (discordant)   | 199,865<br>(6,312)  | 0.5<br>(0.5 to 0.5) | Reference                 |        |
|                              | Male patient-male surgeon (concordant)     | 171,309<br>(6,420)  | 1.1<br>(1.0 to 1.1) | -0.19<br>(-0.62 to +0.24) | 0.39   |
|                              | Male patient-female surgeon (discordant)   | 4,633<br>(377)      | 1.3<br>(0.8 to 1.7) | Reference                 |        |
| Colectomy                    | Female patient-female surgeon (concordant) | 20,956<br>(3,400)   | 5.1<br>(4.7 to 5.4) | -0.6<br>(-1.0 to -0.2)    | 0.0050 |
|                              | Female patient-male surgeon (discordant)   | 109,809<br>(12,885) | 5.6<br>(5.5 to 5.8) | Reference                 |        |
|                              | Male patient-male surgeon (concordant)     | 77,505<br>(11,856)  | 6.5<br>(6.4 to 6.7) | +0.5<br>(-0.1 to +1.1)    | 0.10   |

|                                |                                            |                    |                     |                        |        |
|--------------------------------|--------------------------------------------|--------------------|---------------------|------------------------|--------|
|                                | Male patient-female surgeon (discordant)   | 11,695<br>(2,525)  | 6.1<br>(5.5 to 6.6) | Reference              |        |
| Cholecystectomy                | Female patient-female surgeon (concordant) | 11,213<br>(2,721)  | 2.2<br>(1.9 to 2.5) | -0.2<br>(-0.6 to +0.1) | 0.19   |
|                                | Female patient-male surgeon (discordant)   | 67,794<br>(11,190) | 2.4<br>(2.3 to 2.5) | Reference              |        |
|                                | Male patient-male surgeon (concordant)     | 70,119<br>(11,067) | 2.6<br>(2.5 to 2.7) | +0.5<br>(+0.2 to +0.9) | 0.0015 |
|                                | Male patient-female surgeon (discordant)   | 11,159<br>(2,557)  | 2.1<br>(1.8 to 2.4) | Reference              |        |
| Coronary artery bypass surgery | Female patient-female surgeon (concordant) | 1,341<br>(145)     | 4.1<br>(2.6 to 5.5) | -0.8<br>(-2.3 to +0.7) | 0.28   |
|                                | Female patient-male surgeon (discordant)   | 38,304<br>(2,396)  | 4.9<br>(4.7 to 5.1) | Reference              |        |
|                                | Male patient-male surgeon (concordant)     | 109,910<br>(2,750) | 2.7<br>(2.6 to 2.8) | +0.1<br>(-0.6 to +0.8) | 0.77   |
|                                | Male patient-female surgeon (discordant)   | 3,954<br>(183)     | 2.6<br>(1.9 to 3.2) | Reference              |        |
| Lung resection                 | Female patient-female surgeon (concordant) | 3,783<br>(246)     | 1.3<br>(0.8 to 1.8) | -0.2<br>(-0.7 to +0.3) | 0.40   |

|                                  |                                            |                   |                     |                        |      |
|----------------------------------|--------------------------------------------|-------------------|---------------------|------------------------|------|
|                                  | Female patient-male surgeon (discordant)   | 40,466<br>(2,460) | 1.5<br>(1.4 to 1.6) | Reference              |      |
|                                  | Male patient-male surgeon (concordant)     | 36,110<br>(2,617) | 2.7<br>(2.5 to 2.9) | -0.1<br>(-0.8 to +0.6) | 0.80 |
|                                  | Male patient-female surgeon (discordant)   | 3,020<br>(243)    | 2.8<br>(2.1 to 3.5) | Reference              |      |
| Abdominal aortic aneurysm repair | Female patient-female surgeon (concordant) | 950<br>(356)      | 7.3<br>(5.1 to 9.5) | -0.2<br>(-2.5 to +2.0) | 0.84 |
|                                  | Female patient-male surgeon (discordant)   | 14,576<br>(3,159) | 7.5<br>(7.1 to 7.9) | Reference              |      |
|                                  | Male patient-male surgeon (concordant)     | 44,594<br>(3,899) | 4.4<br>(4.2 to 4.6) | -0.2<br>(-1.2 to +0.9) | 0.75 |
|                                  | Male patient-female surgeon (discordant)   | 2,970<br>(455)    | 4.6<br>(3.6 to 5.6) | Reference              |      |
| Appendectomy                     | Female patient-female surgeon (concordant) | 5,126<br>(2,209)  | 2.1<br>(1.7 to 2.6) | +0.3<br>(-0.2 to +0.7) | 0.24 |
|                                  | Female patient-male surgeon (discordant)   | 22,352<br>(8,436) | 1.9<br>(1.7 to 2.0) | Reference              |      |
|                                  | Male patient-male surgeon (concordant)     | 17,613<br>(7,707) | 2.9<br>(2.6 to 3.1) | +0.1<br>(-0.7 to +0.9) | 0.81 |

|                 |                                            |                   |                       |                         |       |
|-----------------|--------------------------------------------|-------------------|-----------------------|-------------------------|-------|
|                 | Male patient-female surgeon (discordant)   | 3,161<br>(1,633)  | 2.8<br>(2.1 to 3.5)   | Reference               |       |
| Cystectomy      | Female patient-female surgeon (concordant) | 306<br>(133)      | 1.0<br>(-0.6 to 2.6)  | -1.7<br>(-3.6 to +0.1)  | 0.064 |
|                 | Female patient-male surgeon (discordant)   | 2,956<br>(1,105)  | 2.7<br>(2.2 to 3.3)   | Reference               |       |
|                 | Male patient-male surgeon (concordant)     | 10,224<br>(1,910) | 3.0<br>(2.7 to 3.4)   | +0.3<br>(-1.3 to +1.9)  | 0.70  |
|                 | Male patient-female surgeon (discordant)   | 612<br>(127)      | 2.7<br>(1.2 to 4.2)   | Reference               |       |
| Thyroidectomy   | Female patient-female surgeon (concordant) | 410<br>(250)      | 0.3<br>(-0.5 to 1.0)  | -0.3<br>(-1.3 to +0.6)  | 0.47  |
|                 | Female patient-male surgeon (discordant)   | 2,123<br>(1,196)  | 0.6<br>(0.3 to 0.9)   | Reference               |       |
|                 | Male patient-male surgeon (concordant)     | 1,361<br>(854)    | 1.5<br>(0.8 to 2.2)   | +0.03<br>(-2.3 to +2.4) | 0.98  |
|                 | Male patient-female surgeon (discordant)   | 246<br>(150)      | 1.5<br>(-0.7 to 3.6)  | Reference               |       |
| Liver resection | Female patient-female surgeon (concordant) | 80<br>(58)        | 5.9<br>(-1.2 to 13.0) | +1.5<br>(-6.1 to +9.1)  | 0.69  |

|               |                                            |                   |                      |                        |       |
|---------------|--------------------------------------------|-------------------|----------------------|------------------------|-------|
|               | Female patient-male surgeon (discordant)   | 895<br>(462)      | 4.4<br>(3.1 to 5.7)  | Reference              |       |
|               | Male patient-male surgeon (concordant)     | 1,154<br>(520)    | 6.0<br>(4.7 to 7.2)  | +4.1<br>(-0.6 to +8.8) | 0.089 |
|               | Male patient-female surgeon (discordant)   | 121<br>(62)       | 1.9<br>(-2.4 to 6.1) | Reference              |       |
| Prostatectomy | Female patient-female surgeon (concordant) | N/A               | N/A                  | N/A                    | N/A   |
|               | Female patient-male surgeon (discordant)   | N/A               | N/A                  | Reference              |       |
|               | Male patient-male surgeon (concordant)     | 58,636<br>(5,275) | 0.9<br>(0.8 to 1.0)  | +0.2<br>(-0.4 to +0.8) | 0.46  |
|               | Male patient-female surgeon (discordant)   | 1,838<br>(365)    | 0.7<br>(0.1 to 1.3)  | Reference              |       |
| Hysterectomy  | Female patient-female surgeon (concordant) | 17,355<br>(3,533) | 0.9<br>(0.7 to 1.1)  | -0.1<br>(-0.4 to +0.1) | 0.22  |
|               | Female patient-male surgeon (discordant)   | 28,079<br>(5,022) | 1.0<br>(0.9 to 1.2)  | Reference              |       |
|               | Male patient-male surgeon (concordant)     | N/A               | N/A                  | N/A                    | N/A   |

|  |                                                 |     |     |           |
|--|-------------------------------------------------|-----|-----|-----------|
|  | Male patient-<br>female surgeon<br>(discordant) | N/A | N/A | Reference |
|--|-------------------------------------------------|-----|-----|-----------|

Adjusted for patient characteristics (age, race and ethnicity, 27 chronic conditions, procedure type [for the analysis pooling the 14 procedure types], procedure electiveness, weekend versus weekday, month and year of surgery, and Medicaid coverage), surgeon characteristics (years of experience and operative volume), and hospital fixed effects (indicator variables for each hospital, effectively comparing patients treated at the same hospital).

Abbreviation: pp = percentage point.

**eTable 10. Association between patient-surgeon gender concordance and patient adjusted 30-day mortality rates for hospitals where at least 10 surgical procedures performed by a female surgeon (elective and non-elective procedures combined)**

|                             |                                                   | No. of patients<br>(No. of<br>surgeons) | Adjusted mortality<br>rate, % (95%CI) | Adjusted risk difference,<br>pp (95%CI) | P-value |
|-----------------------------|---------------------------------------------------|-----------------------------------------|---------------------------------------|-----------------------------------------|---------|
| 14 procedures<br>(combined) | Female patient-<br>female surgeon<br>(concordant) | 83,870<br>(7,764)                       | 1.4<br>(1.3 to 1.5)                   | -0.1<br>(-0.2 to +0.02)                 | 0.11    |
|                             | Female patient-<br>male surgeon<br>(discordant)   | 1,188,154<br>(36,958)                   | 1.5<br>(1.5 to 1.5)                   | Reference                               |         |
|                             | Male patient-<br>male surgeon<br>(concordant)     | 941,671<br>(36,675)                     | 2.1<br>(2.0 to 2.1)                   | +0.3<br>(+0.1 to +0.4)                  | 0.0011  |
|                             | Male patient-<br>female surgeon<br>(discordant)   | 51,839<br>(5,080)                       | 1.8<br>(1.6 to 1.9)                   | Reference                               |         |
| Knee replacement            | Female patient-<br>female surgeon<br>(concordant) | 8,709<br>(362)                          | 0.2<br>(0.1 to 0.3)                   | +0.02<br>(-0.1 to +0.1)                 | 0.68    |
|                             | Female patient-<br>male surgeon<br>(discordant)   | 384,916<br>(8,158)                      | 0.2<br>(0.1 to 0.2)                   | Reference                               |         |
|                             | Male patient-<br>male surgeon<br>(concordant)     | 222,120<br>(7,737)                      | 0.2<br>(0.2 to 0.3)                   | +0.1<br>(-0.03 to +0.3)                 | 0.10    |
|                             | Male patient-<br>female surgeon<br>(discordant)   | 4,450<br>(323)                          | 0.1<br>(-0.1 to 0.3)                  | Reference                               |         |
| Hip replacement             | Female patient-<br>female surgeon<br>(concordant) | 10,208<br>(751)                         | 1.8<br>(1.4 to 2.2)                   | +0.1<br>(-0.2 to +0.6)                  | 0.36    |



|                              |                                            |                     |                     |                        |       |
|------------------------------|--------------------------------------------|---------------------|---------------------|------------------------|-------|
|                              | Female patient-male surgeon (discordant)   | 344,928<br>(11,482) | 1.6<br>(1.6 to 1.7) | Reference              |       |
|                              | Male patient-male surgeon (concordant)     | 193,480<br>(10,332) | 2.3<br>(2.2 to 2.4) | +0.3<br>(-0.4 to +0.9) | 0.41  |
|                              | Male patient-female surgeon (discordant)   | 4,949<br>(628)      | 2.0<br>(1.4 to 2.7) | Reference              |       |
| Laminectomy or Spinal Fusion | Female patient-female surgeon (concordant) | 5,369<br>(346)      | 0.5<br>(0.2 to 0.7) | -0.1<br>(-0.3 to +0.2) | 0.62  |
|                              | Female patient-male surgeon (discordant)   | 174,207<br>(5,824)  | 0.5<br>(0.5 to 0.6) | Reference              |       |
|                              | Male patient-male surgeon (concordant)     | 149,899<br>(5,925)  | 1.1<br>(1.1 to 1.2) | -0.1<br>(-0.6 to +0.3) | 0.51  |
|                              | Male patient-female surgeon (discordant)   | 4,599<br>(368)      | 1.3<br>(0.8 to 1.7) | Reference              |       |
| Colectomy                    | Female patient-female surgeon (concordant) | 20,509<br>(3,216)   | 4.9<br>(4.6 to 5.3) | -0.5<br>(-0.9 to -0.1) | 0.014 |
|                              | Female patient-male surgeon (discordant)   | 92,735<br>(11,064)  | 5.4<br>(5.3 to 5.6) | Reference              |       |
|                              | Male patient-male surgeon (concordant)     | 65,167<br>(10,059)  | 6.4<br>(6.3 to 6.6) | +0.4<br>(-0.1 to +1.0) | 0.14  |

|                                |                                            |                    |                     |                        |        |
|--------------------------------|--------------------------------------------|--------------------|---------------------|------------------------|--------|
|                                | Male patient-female surgeon (discordant)   | 11,415<br>(2,397)  | 6.0<br>(5.5 to 6.5) | Reference              |        |
| Cholecystectomy                | Female patient-female surgeon (concordant) | 10,809<br>(2,562)  | 2.1<br>(1.8 to 2.4) | -0.3<br>(-0.7 to +0.1) | 0.10   |
|                                | Female patient-male surgeon (discordant)   | 55,901<br>(9,495)  | 2.4<br>(2.2 to 2.5) | Reference              |        |
|                                | Male patient-male surgeon (concordant)     | 57,993<br>(9,419)  | 2.6<br>(2.4 to 2.7) | +0.5<br>(+0.2 to +0.8) | 0.0026 |
|                                | Male patient-female surgeon (discordant)   | 10,796<br>(2,413)  | 2.0<br>(1.7 to 2.3) | Reference              |        |
| Coronary artery bypass surgery | Female patient-female surgeon (concordant) | 1,335<br>(142)     | 4.1<br>(2.6 to 5.5) | -0.8<br>(-2.3 to +0.7) | 0.31   |
|                                | Female patient-male surgeon (discordant)   | 34,672<br>(2,252)  | 4.9<br>(4.6 to 5.1) | Reference              |        |
|                                | Male patient-male surgeon (concordant)     | 100,558<br>(2,593) | 2.6<br>(2.5 to 2.7) | +0.1<br>(-0.6 to +0.8) | 0.82   |
|                                | Male patient-female surgeon (discordant)   | 3,941<br>(179)     | 2.5<br>(1.9 to 3.2) | Reference              |        |
| Lung resection                 | Female patient-female surgeon (concordant) | 3,768<br>(243)     | 1.3<br>(0.8 to 1.7) | -0.2<br>(-0.7 to +0.3) | 0.47   |

|                                  |                                            |                   |                     |                        |      |
|----------------------------------|--------------------------------------------|-------------------|---------------------|------------------------|------|
|                                  | Female patient-male surgeon (discordant)   | 37,563<br>(2,185) | 1.5<br>(1.3 to 1.6) | Reference              |      |
|                                  | Male patient-male surgeon (concordant)     | 33,341<br>(2,335) | 2.6<br>(2.4 to 2.7) | -0.1<br>(-0.8 to +0.6) | 0.79 |
|                                  | Male patient-female surgeon (discordant)   | 3,013<br>(241)    | 2.7<br>(2.0 to 3.4) | Reference              |      |
| Abdominal aortic aneurysm repair | Female patient-female surgeon (concordant) | 933<br>(345)      | 7.2<br>(5.1 to 9.4) | -0.3<br>(-2.6 to +2.0) | 0.79 |
|                                  | Female patient-male surgeon (discordant)   | 13,258<br>(2,886) | 7.5<br>(7.1 to 8.0) | Reference              |      |
|                                  | Male patient-male surgeon (concordant)     | 40,197<br>(3,547) | 4.5<br>(4.3 to 4.7) | -0.1<br>(-1.1 to +1.0) | 0.92 |
|                                  | Male patient-female surgeon (discordant)   | 2,896<br>(437)    | 4.6<br>(3.6 to 5.6) | Reference              |      |
| Appendectomy                     | Female patient-female surgeon (concordant) | 4,942<br>(2,094)  | 2.1<br>(1.7 to 2.5) | +0.3<br>(-0.2 to +0.8) | 0.18 |
|                                  | Female patient-male surgeon (discordant)   | 18,564<br>(7,059) | 1.8<br>(1.6 to 2.0) | Reference              |      |
|                                  | Male patient-male surgeon (concordant)     | 14,185<br>(6,354) | 2.9<br>(2.6 to 3.2) | -0.1<br>(-0.8 to +0.7) | 0.91 |

|                 |                                            |                  |                       |                         |       |
|-----------------|--------------------------------------------|------------------|-----------------------|-------------------------|-------|
|                 | Male patient-female surgeon (discordant)   | 3,030<br>(1,554) | 2.9<br>(2.2 to 3.6)   | Reference               |       |
| Cystectomy      | Female patient-female surgeon (concordant) | 305<br>(132)     | 0.9<br>(-0.7 to 2.5)  | -1.7<br>(-3.5 to +0.1)  | 0.068 |
|                 | Female patient-male surgeon (discordant)   | 2,846<br>(1,033) | 2.6<br>(2.0 to 3.2)   | Reference               |       |
|                 | Male patient-male surgeon (concordant)     | 9,769<br>(1,755) | 2.9<br>(2.6 to 3.3)   | +0.1<br>(-1.4 to +1.7)  | 0.86  |
|                 | Male patient-female surgeon (discordant)   | 608<br>(124)     | 2.8<br>(1.3 to 4.3)   | Reference               |       |
| Thyroidectomy   | Female patient-female surgeon (concordant) | 388<br>(232)     | 0.2<br>(-0.5 to 1.0)  | -0.3<br>(-1.2 to +0.6)  | 0.50  |
|                 | Female patient-male surgeon (discordant)   | 1,910<br>(1,050) | 0.5<br>(0.2 to 0.8)   | Reference               |       |
|                 | Male patient-male surgeon (concordant)     | 1,267<br>(771)   | 1.6<br>(0.9 to 2.3)   | +0.03<br>(-2.3 to +2.4) | 0.98  |
|                 | Male patient-female surgeon (discordant)   | 241<br>(145)     | 1.6<br>(-0.5 to 3.7)  | Reference               |       |
| Liver resection | Female patient-female surgeon (concordant) | 79<br>(57)       | 6.0<br>(-1.0 to 13.1) | +1.6<br>(-6.0 to +9.1)  | 0.69  |

|               |                                            |                   |                      |                        |       |
|---------------|--------------------------------------------|-------------------|----------------------|------------------------|-------|
|               | Female patient-male surgeon (discordant)   | 876<br>(444)      | 4.5<br>(3.1 to 5.8)  | Reference              |       |
|               | Male patient-male surgeon (concordant)     | 1,132<br>(505)    | 5.7<br>(4.4 to 7.0)  | +4.1<br>(-0.6 to +8.8) | 0.085 |
|               | Male patient-female surgeon (discordant)   | 121<br>(62)       | 1.5<br>(-2.7 to 5.8) | Reference              |       |
| Prostatectomy | Female patient-female surgeon (concordant) | N/A               | N/A                  | N/A                    | N/A   |
|               | Female patient-male surgeon (discordant)   | N/A               | N/A                  | Reference              |       |
|               | Male patient-male surgeon (concordant)     | 52,563<br>(4,680) | 0.9<br>(0.8 to 1.0)  | +0.2<br>(-0.4 to +0.8) | 0.50  |
|               | Male patient-female surgeon (discordant)   | 1,780<br>(342)    | 0.7<br>(0.1 to 1.3)  | Reference              |       |
| Hysterectomy  | Female patient-female surgeon (concordant) | 16,516<br>(3,042) | 0.9<br>(0.8 to 1.1)  | -0.1<br>(-0.3 to +0.1) | 0.40  |
|               | Female patient-male surgeon (discordant)   | 25,778<br>(4,327) | 1.0<br>(0.9 to 1.1)  | Reference              |       |
|               | Male patient-male surgeon (concordant)     | N/A               | N/A                  | N/A                    | N/A   |

|  |                                                 |     |     |           |
|--|-------------------------------------------------|-----|-----|-----------|
|  | Male patient-<br>female surgeon<br>(discordant) | N/A | N/A | Reference |
|--|-------------------------------------------------|-----|-----|-----------|

Adjusted for patient characteristics (age, race and ethnicity, 27 chronic conditions, procedure type [for the analysis pooling the 14 procedure types], procedure electiveness, weekend versus weekday, month and year of surgery, and Medicaid coverage), surgeon characteristics (years of experience and operative volume), and hospital fixed effects (indicator variables for each hospital, effectively comparing patients treated at the same hospital).

Abbreviation: pp = percentage point.

**eTable 11. Association between patient-surgeon gender concordance and patient adjusted 30-day mortality rates (non-elective procedures within 7 days since hospital admission)**

|                             |                                                   | No. of patients<br>(No. of<br>surgeons) | Adjusted mortality<br>rate, % (95%CI) | Adjusted risk difference,<br>pp (95%CI) | P-value |
|-----------------------------|---------------------------------------------------|-----------------------------------------|---------------------------------------|-----------------------------------------|---------|
| 14 procedures<br>(combined) | Female patient-<br>female surgeon<br>(concordant) | 32,809<br>(5,264)                       | 5.2<br>(4.9 to 5.4)                   | -0.1<br>(-0.4 to +0.2)                  | 0.51    |
|                             | Female patient-<br>male surgeon<br>(discordant)   | 366,728<br>(35,796)                     | 5.3<br>(5.2 to 5.3)                   | Reference                               |         |
|                             | Male patient-<br>male surgeon<br>(concordant)     | 297,462<br>(36,090)                     | 6.1<br>(6.1 to 6.2)                   | +0.2<br>(-0.1 to +0.6)                  | 0.15    |
|                             | Male patient-<br>female surgeon<br>(discordant)   | 26,062<br>(4,562)                       | 5.9<br>(5.6 to 6.2)                   | Reference                               |         |
| Knee replacement            | Female patient-<br>female surgeon<br>(concordant) | 462<br>(108)                            | 2.4<br>(0.8 to 3.9)                   | +1.5<br>(-0.1 to +3.1)                  | 0.066   |
|                             | Female patient-<br>male surgeon<br>(discordant)   | 21,474<br>(3,940)                       | 0.9<br>(0.8 to 1.0)                   | Reference                               |         |
|                             | Male patient-<br>male surgeon<br>(concordant)     | 12,231<br>(2,976)                       | 0.9<br>(0.7 to 1.0)                   | +0.2<br>(-1.4 to +1.8)                  | 0.81    |
|                             | Male patient-<br>female surgeon<br>(discordant)   | 238<br>(76)                             | 0.7<br>(-0.9 to 2.2)                  | Reference                               |         |
| Hip replacement             | Female patient-<br>female surgeon<br>(concordant) | 5,622<br>(757)                          | 4.9<br>(4.3 to 5.6)                   | +0.4<br>(-0.3 to +1.1)                  | 0.26    |

|                              |                                            |                     |                        |                         |       |
|------------------------------|--------------------------------------------|---------------------|------------------------|-------------------------|-------|
|                              | Female patient-male surgeon (discordant)   | 153,274<br>(13,377) | 4.5<br>(4.4 to 4.6)    | Reference               |       |
|                              | Male patient-male surgeon (concordant)     | 67,575<br>(11,756)  | 8.2<br>(8.0 to 8.4)    | +0.3<br>(-1.0 to +1.5)  | 0.66  |
|                              | Male patient-female surgeon (discordant)   | 2,588<br>(621)      | 7.9<br>(6.7 to 9.1)    | Reference               |       |
| Laminectomy or Spinal Fusion | Female patient-female surgeon (concordant) | 873<br>(255)        | 2.6<br>(1.2 to 4.0)    | -0.1<br>(-1.5 to +1.3)  | 0.90  |
|                              | Female patient-male surgeon (discordant)   | 25,620<br>(4,752)   | 2.7<br>(2.5 to 2.9)    | Reference               |       |
|                              | Male patient-male surgeon (concordant)     | 27,037<br>(4,962)   | 4.9<br>(4.6 to 5.1)    | -0.1<br>(-1.9 to +1.7)  | 0.89  |
|                              | Male patient-female surgeon (discordant)   | 1,008<br>(298)      | 5.0<br>(3.3 to 6.7)    | Reference               |       |
| Colectomy                    | Female patient-female surgeon (concordant) | 8,634<br>(2,683)    | 12.4<br>(11.6 to 13.2) | -0.9<br>(-1.7 to +0.03) | 0.059 |
|                              | Female patient-male surgeon (discordant)   | 48,908<br>(11,600)  | 13.3<br>(13.0 to 13.6) | Reference               |       |
|                              | Male patient-male surgeon (concordant)     | 33,259<br>(10,458)  | 14.6<br>(14.2 to 15.0) | +0.9<br>(-0.3 to +2.1)  | 0.15  |



|                                |                                            |                    |                        |                         |       |
|--------------------------------|--------------------------------------------|--------------------|------------------------|-------------------------|-------|
|                                | Male patient-female surgeon (discordant)   | 5,386<br>(2,169)   | 13.7<br>(12.7 to 14.8) | Reference               |       |
| Cholecystectomy                | Female patient-female surgeon (concordant) | 10,671<br>(2,433)  | 2.7<br>(2.3 to 3.0)    | -0.1<br>(-0.5 to +0.3)  | 0.71  |
|                                | Female patient-male surgeon (discordant)   | 66,722<br>(11,080) | 2.7<br>(2.6 to 2.9)    | Reference               |       |
|                                | Male patient-male surgeon (concordant)     | 68,078<br>(10,978) | 2.8<br>(2.7 to 2.9)    | +0.4<br>(+0.02 to +0.7) | 0.040 |
|                                | Male patient-female surgeon (discordant)   | 10,699<br>(2,419)  | 2.4<br>(2.1 to 2.7)    | Reference               |       |
| Coronary artery bypass surgery | Female patient-female surgeon (concordant) | 771<br>(134)       | 6.1<br>(3.8 to 8.4)    | -0.2<br>(-2.6 to +2.2)  | 0.86  |
|                                | Female patient-male surgeon (discordant)   | 21,532<br>(2,252)  | 6.3<br>(6.0 to 6.6)    | Reference               |       |
|                                | Male patient-male surgeon (concordant)     | 52,439<br>(2,481)  | 3.7<br>(3.6 to 3.9)    | -0.2<br>(-1.2 to +0.9)  | 0.75  |
|                                | Male patient-female surgeon (discordant)   | 1,882<br>(147)     | 3.9<br>(2.8 to 4.9)    | Reference               |       |
| Lung resection                 | Female patient-female surgeon (concordant) | 253<br>(127)       | 3.4<br>(-2.1 to 8.9)   | -5.4<br>(-11.4 to +0.5) | 0.073 |

|                                  |                                            |                   |                        |                        |      |
|----------------------------------|--------------------------------------------|-------------------|------------------------|------------------------|------|
|                                  | Female patient-male surgeon (discordant)   | 3,076<br>(1,324)  | 8.8<br>(7.8 to 9.8)    | Reference              |      |
|                                  | Male patient-male surgeon (concordant)     | 4,329<br>(1,734)  | 11.0<br>(10.0 to 11.9) | +3.5<br>(-1.9 to +8.8) | 0.20 |
|                                  | Male patient-female surgeon (discordant)   | 313<br>(144)      | 7.5<br>(2.4 to 12.5)   | Reference              |      |
| Abdominal aortic aneurysm repair | Female patient-female surgeon (concordant) | 326<br>(192)      | 17.5<br>(11.7 to 23.2) | -1.1<br>(-7.2 to +5.1) | 0.73 |
|                                  | Female patient-male surgeon (discordant)   | 3,653<br>(1,855)  | 18.5<br>(17.3 to 19.8) | Reference              |      |
|                                  | Male patient-male surgeon (concordant)     | 9,149<br>(2,800)  | 15.0<br>(14.3 to 15.7) | -2.2<br>(-5.6 to +1.2) | 0.21 |
|                                  | Male patient-female surgeon (discordant)   | 810<br>(325)      | 17.2<br>(14.0 to 20.4) | Reference              |      |
| Appendectomy                     | Female patient-female surgeon (concordant) | 3,376<br>(1,724)  | 2.6<br>(2.0 to 3.1)    | +0.1<br>(-0.6 to +0.7) | 0.86 |
|                                  | Female patient-male surgeon (discordant)   | 18,651<br>(7,805) | 2.5<br>(2.3 to 2.7)    | Reference              |      |
|                                  | Male patient-male surgeon (concordant)     | 16,295<br>(7,350) | 3.1<br>(2.8 to 3.4)    | +0.1<br>(-0.8 to +0.9) | 0.91 |

|               |                                            |                  |                          |                           |      |
|---------------|--------------------------------------------|------------------|--------------------------|---------------------------|------|
|               | Male patient-female surgeon (discordant)   | 2,848<br>(1,498) | 3.1<br>(2.3 to 3.9)      | Reference                 |      |
| Cystectomy    | Female patient-female surgeon (concordant) | 21<br>(21)       | -13.4<br>(-47.1 to 20.3) | -22.1<br>(-59.4 to +15.1) | 0.23 |
|               | Female patient-male surgeon (discordant)   | 192<br>(152)     | 8.8<br>(3.9 to 13.6)     | Reference                 |      |
|               | Male patient-male surgeon (concordant)     | 657<br>(398)     | 5.7<br>(4.1 to 7.2)      | +3.5<br>(-7.3 to +14.2)   | 0.52 |
|               | Male patient-female surgeon (discordant)   | 34<br>(25)       | 2.2<br>(-8.2 to 12.5)    | Reference                 |      |
| Prostatectomy | Female patient-female surgeon (concordant) | N/A              | N/A                      | N/A                       | N/A  |
|               | Female patient-male surgeon (discordant)   | N/A              | N/A                      | Reference                 |      |
|               | Male patient-male surgeon (concordant)     | 6,125<br>(2,434) | 2.6<br>(2.2 to 3.0)      | -3.0<br>(-7.5 to +1.5)    | 0.19 |
|               | Male patient-female surgeon (discordant)   | 211<br>(120)     | 5.7<br>(1.3 to 10.0)     | Reference                 |      |
| Hysterectomy  | Female patient-female surgeon (concordant) | 1,748<br>(783)   | 2.7<br>(1.8 to 3.7)      | -0.3<br>(-1.6 to +1.0)    | 0.65 |

|  |                                                 |                  |                     |           |     |
|--|-------------------------------------------------|------------------|---------------------|-----------|-----|
|  | Female patient-<br>male surgeon<br>(discordant) | 3,272<br>(1,314) | 3.0<br>(2.4 to 3.7) | Reference |     |
|  | Male patient-<br>male surgeon<br>(concordant)   | N/A              | N/A                 | N/A       | N/A |
|  | Male patient-<br>female surgeon<br>(discordant) | N/A              | N/A                 | Reference |     |

Adjusted for patient characteristics (age, race and ethnicity, 27 chronic conditions, procedure type [for the analysis pooling the 14 procedure types], weekend versus weekday, month and year of surgery, and Medicaid coverage), surgeon characteristics (years of experience and operative volume), and hospital fixed effects (indicator variables for each hospital, effectively comparing patients treated at the same hospital).

Thyroidectomy and liver resection were removed as the estimate did not converge due to the small sample size.

Abbreviation: pp = percentage point.

**eTable 12. Association between patient-surgeon gender concordance and patient adjusted 30-day mortality rates (non-elective procedures within 14 days since hospital admission)**

| Total= 760,415              |                                            | No. of patients<br>(No. of surgeons) | Adjusted mortality rate, % (95%CI) | Adjusted risk difference, pp (95%CI) | P-value |
|-----------------------------|--------------------------------------------|--------------------------------------|------------------------------------|--------------------------------------|---------|
| 14 procedures<br>(combined) | Female patient-female surgeon (concordant) | 34,456<br>(5,365)                    | 5.4<br>(5.1 to 5.7)                | -0.1<br>(-0.4 to +0.2)               | 0.37    |
|                             | Female patient-male surgeon (discordant)   | 382,428<br>(36,327)                  | 5.5<br>(5.5 to 5.6)                | Reference                            |         |
|                             | Male patient-male surgeon (concordant)     | 316,035<br>(36,661)                  | 6.4<br>(6.4 to 6.5)                | +0.3<br>(-0.1 to +0.6)               | 0.12    |
|                             | Male patient-female surgeon (discordant)   | 27,496<br>(4,652)                    | 6.2<br>(5.9 to 6.5)                | Reference                            |         |
| Knee replacement            | Female patient-female surgeon (concordant) | 469<br>(112)                         | 2.6<br>(1.0 to 4.2)                | +1.6<br>(+0.004 to +3.2)             | 0.049   |
|                             | Female patient-male surgeon (discordant)   | 21,743<br>(4,023)                    | 1.0<br>(0.9 to 1.1)                | Reference                            |         |
|                             | Male patient-male surgeon (concordant)     | 12,393<br>(3,050)                    | 0.9<br>(0.8 to 1.1)                | +0.3<br>(-1.2 to +1.7)               | 0.75    |
|                             | Male patient-female surgeon (discordant)   | 247<br>(82)                          | 0.7<br>(-0.8 to 2.1)               | Reference                            |         |
| Hip replacement             | Female patient-female surgeon (concordant) | 5,663<br>(758)                       | 5.0<br>(4.3 to 5.6)                | +0.4<br>(-0.3 to +1.1)               | 0.24    |

|                                 |                                            |                     |                        |                        |      |
|---------------------------------|--------------------------------------------|---------------------|------------------------|------------------------|------|
|                                 | Female patient-male surgeon (discordant)   | 154,563<br>(13,425) | 4.6<br>(4.5 to 4.7)    | Reference              |      |
|                                 | Male patient-male surgeon (concordant)     | 68,461<br>(11,816)  | 8.3<br>(8.1 to 8.5)    | +0.3<br>(-1.0 to +1.5) | 0.66 |
|                                 | Male patient-female surgeon (discordant)   | 2,630<br>(629)      | 8.0<br>(6.8 to 9.2)    | Reference              |      |
| Laminectomy<br>or Spinal Fusion | Female patient-female surgeon (concordant) | 960<br>(266)        | 2.6<br>(1.2 to 3.9)    | -0.3<br>(-1.7 to +1.1) | 0.68 |
|                                 | Female patient-male surgeon (discordant)   | 27,619<br>(4,917)   | 2.9<br>(2.7 to 3.1)    | Reference              |      |
|                                 | Male patient-male surgeon (concordant)     | 29,262<br>(5,126)   | 5.2<br>(4.9 to 5.4)    | +0.5<br>(-1.2 to +2.3) | 0.56 |
|                                 | Male patient-female surgeon (discordant)   | 1,106<br>(315)      | 4.7<br>(3.0 to 6.4)    | Reference              |      |
| Colectomy                       | Female patient-female surgeon (concordant) | 9,472<br>(2,789)    | 12.9<br>(12.2 to 13.7) | -0.6<br>(-1.4 to +0.3) | 0.18 |
|                                 | Female patient-male surgeon (discordant)   | 53,674<br>(12,189)  | 13.5<br>(13.2 to 13.8) | Reference              |      |
|                                 | Male patient-male surgeon (concordant)     | 36,728<br>(11,095)  | 15.2<br>(14.8 to 15.5) | +0.9<br>(-0.3 to +2.0) | 0.14 |

|                                |                                            |                    |                        |                         |        |
|--------------------------------|--------------------------------------------|--------------------|------------------------|-------------------------|--------|
|                                | Male patient-female surgeon (discordant)   | 5,908<br>(2,265)   | 14.3<br>(13.2 to 15.3) | Reference               |        |
| Cholecystectomy                | Female patient-female surgeon (concordant) | 10,973<br>(2,457)  | 2.8<br>(2.5 to 3.2)    | -0.2<br>(-0.5 to +0.2)  | 0.46   |
|                                | Female patient-male surgeon (discordant)   | 68,957<br>(11,259) | 3.0<br>(2.8 to 3.1)    | Reference               |        |
|                                | Male patient-male surgeon (concordant)     | 70,304<br>(11,143) | 3.0<br>(2.9 to 3.1)    | +0.4<br>(+0.1 to +0.8)  | 0.027  |
|                                | Male patient-female surgeon (discordant)   | 10,982<br>(2,451)  | 2.6<br>(2.3 to 2.9)    | Reference               |        |
| Coronary artery bypass surgery | Female patient-female surgeon (concordant) | 893<br>(145)       | 5.9<br>(3.8 to 8.0)    | -0.7<br>(-2.8 to +1.5)  | 0.56   |
|                                | Female patient-male surgeon (discordant)   | 25,049<br>(2,326)  | 6.6<br>(6.2 to 6.9)    | Reference               |        |
|                                | Male patient-male surgeon (concordant)     | 59,502<br>(2,587)  | 4.0<br>(3.8 to 4.1)    | -0.3<br>(-1.4 to +0.7)  | 0.52   |
|                                | Male patient-female surgeon (discordant)   | 2,176<br>(165)     | 4.3<br>(3.3 to 5.3)    | Reference               |        |
| Lung resection                 | Female patient-female surgeon (concordant) | 301<br>(146)       | 3.7<br>(-1.2 to 8.6)   | -7.3<br>(-12.6 to -2.0) | 0.0070 |

|                                  |                                            |                   |                        |                         |      |
|----------------------------------|--------------------------------------------|-------------------|------------------------|-------------------------|------|
|                                  | Female patient-male surgeon (discordant)   | 3,727<br>(1,545)  | 11.0<br>(10.0 to 12.0) | Reference               |      |
|                                  | Male patient-male surgeon (concordant)     | 5,359<br>(1,994)  | 12.8<br>(11.9 to 13.7) | +3.4<br>(-1.6 to +8.4)  | 0.18 |
|                                  | Male patient-female surgeon (discordant)   | 374<br>(164)      | 9.4<br>(4.7 to 14.1)   | Reference               |      |
| Abdominal aortic aneurysm repair | Female patient-female surgeon (concordant) | 351<br>(204)      | 17.8<br>(12.3 to 23.2) | -0.4<br>(-6.2 to +5.4)  | 0.90 |
|                                  | Female patient-male surgeon (discordant)   | 3,919<br>(1,941)  | 18.1<br>(16.9 to 19.4) | Reference               |      |
|                                  | Male patient-male surgeon (concordant)     | 9,697<br>(2,912)  | 15.1<br>(14.4 to 15.8) | -2.2<br>(-5.5 to +1.1)  | 0.19 |
|                                  | Male patient-female surgeon (discordant)   | 870<br>(335)      | 17.3<br>(14.2 to 20.4) | Reference               |      |
| Appendectomy                     | Female patient-female surgeon (concordant) | 3,454<br>(1,751)  | 2.6<br>(2.0 to 3.2)    | -0.1<br>(-0.8 to +0.6)  | 0.75 |
|                                  | Female patient-male surgeon (discordant)   | 19,043<br>(7,904) | 2.7<br>(2.5 to 3.0)    | Reference               |      |
|                                  | Male patient-male surgeon (concordant)     | 16,597<br>(7,444) | 3.3<br>(3.0 to 3.6)    | -0.03<br>(-0.9 to +0.9) | 0.95 |



|               |                                            |                  |                          |                           |      |
|---------------|--------------------------------------------|------------------|--------------------------|---------------------------|------|
|               | Male patient-female surgeon (discordant)   | 2,883<br>(1,509) | 3.3<br>(2.5 to 4.1)      | Reference                 |      |
| Cystectomy    | Female patient-female surgeon (concordant) | 25<br>(24)       | -13.0<br>(-43.5 to 17.6) | -23.4<br>(-57.3 to +10.6) | 0.17 |
|               | Female patient-male surgeon (discordant)   | 214<br>(173)     | 10.4<br>(5.7 to 15.0)    | Reference                 |      |
|               | Male patient-male surgeon (concordant)     | 756<br>(457)     | 6.1<br>(4.6 to 7.6)      | +1.8<br>(-8.9 to +12.5)   | 0.74 |
|               | Male patient-female surgeon (discordant)   | 39<br>(30)       | 4.3<br>(-5.9 to 14.6)    | Reference                 |      |
| Thyroidectomy | Female patient-female surgeon (concordant) | 48<br>(46)       | 5.8<br>(0.6 to 11.0)     | +2.2<br>(-3.8 to +8.1)    | 0.47 |
|               | Female patient-male surgeon (discordant)   | 310<br>(255)     | 3.6<br>(2.6 to 4.6)      | Reference                 |      |
|               | Male patient-male surgeon (concordant)     | 181<br>(154)     | 3.7<br>(-1.9 to 9.4)     | -8.7<br>(-51.6 to +34.2)  | 0.65 |
|               | Male patient-female surgeon (discordant)   | 26<br>(25)       | 12.4<br>(-25.0 to 49.8)  | Reference                 |      |
| Prostatectomy | Female patient-female surgeon (concordant) | N/A              | N/A                      | N/A                       | N/A  |

|              |                                            |                  |                     |                        |      |
|--------------|--------------------------------------------|------------------|---------------------|------------------------|------|
|              | Female patient-male surgeon (discordant)   | N/A              | N/A                 | Reference              |      |
|              | Male patient-male surgeon (concordant)     | 6,640<br>(2,594) | 3.0<br>(2.6 to 3.4) | -2.1<br>(-6.2 to +2.0) | 0.31 |
|              | Male patient-female surgeon (discordant)   | 233<br>(132)     | 5.1<br>(1.1 to 9.1) | Reference              |      |
| Hysterectomy | Female patient-female surgeon (concordant) | 1,832<br>(816)   | 2.8<br>(1.8 to 3.8) | -0.5<br>(-1.8 to +0.9) | 0.50 |
|              | Female patient-male surgeon (discordant)   | 3,501<br>(1,405) | 3.3<br>(2.6 to 3.9) | Reference              |      |
|              | Male patient-male surgeon (concordant)     | N/A              | N/A                 | N/A                    | N/A  |
|              | Male patient-female surgeon (discordant)   | N/A              | N/A                 | Reference              |      |

Adjusted for patient characteristics (age, race and ethnicity, 27 chronic conditions, procedure type [for the analysis pooling the 14 procedure types], weekend versus weekday, month and year of surgery, and Medicaid coverage), surgeon characteristics (years of experience and operative volume), and hospital fixed effects (indicator variables for each hospital, effectively comparing patients treated at the same hospital).

Liver resection was removed as the estimate did not converge due to the small sample size.

Abbreviation: pp = percentage point.

**eTable 13. Association between patient-surgeon gender concordance and patient adjusted 30-day mortality rates, adjusting for individual ICD-10-PCS procedure codes instead of procedure type (elective and non-elective procedures combined)**

|                             |                                                   | No. of patients<br>(No. of<br>surgeons) | Adjusted mortality<br>rate, % (95%CI) | Adjusted risk difference,<br>pp (95%CI) | P-value |
|-----------------------------|---------------------------------------------------|-----------------------------------------|---------------------------------------|-----------------------------------------|---------|
| 14 procedures<br>(combined) | Female patient-<br>female surgeon<br>(concordant) | 86,133<br>(8,556)                       | 1.4<br>(1.3 to 1.5)                   | -0.1<br>(-0.2 to +0.01)                 | 0.063   |
|                             | Female patient-<br>male surgeon<br>(discordant)   | 1,561,967<br>(44,295)                   | 1.5<br>(1.5 to 1.5)                   | Reference                               |         |
|                             | Male patient-<br>male surgeon<br>(concordant)     | 1,201,712<br>(43,723)                   | 2.0<br>(2.0 to 2.0)                   | +0.2<br>(+0.1 to +0.4)                  | 0.0052  |
|                             | Male patient-<br>female surgeon<br>(discordant)   | 52,944<br>(5,371)                       | 1.8<br>(1.6 to 1.9)                   | Reference                               |         |
| Knee replacement            | Female patient-<br>female surgeon<br>(concordant) | 8,775<br>(375)                          | 0.2<br>(0.1 to 0.3)                   | +0.03<br>(-0.1 to +0.1)                 | 0.66    |
|                             | Female patient-<br>male surgeon<br>(discordant)   | 541,786<br>(10,639)                     | 0.2<br>(0.1 to 0.2)                   | Reference                               |         |
|                             | Male patient-<br>male surgeon<br>(concordant)     | 313,120<br>(10,202)                     | 0.3<br>(0.2 to 0.3)                   | +0.1<br>(-0.04 to +0.3)                 | 0.13    |
|                             | Male patient-<br>female surgeon<br>(discordant)   | 4,487<br>(334)                          | 0.1<br>(-0.04 to 0.3)                 | Reference                               |         |
| Hip replacement             | Female patient-<br>female surgeon<br>(concordant) | 10,421<br>(792)                         | 1.8<br>(1.4 to 2.1)                   | +0.1<br>(-0.2 to +0.5)                  | 0.47    |

|                              |                                            |                     |                     |                        |       |
|------------------------------|--------------------------------------------|---------------------|---------------------|------------------------|-------|
|                              | Female patient-male surgeon (discordant)   | 457,472<br>(14,164) | 1.6<br>(1.6 to 1.7) | Reference              |       |
|                              | Male patient-male surgeon (concordant)     | 255,394<br>(12,932) | 2.3<br>(2.2 to 2.4) | +0.4<br>(-0.3 to +1.1) | 0.22  |
|                              | Male patient-female surgeon (discordant)   | 5,048<br>(661)      | 1.9<br>(1.2 to 2.5) | Reference              |       |
| Laminectomy or Spinal Fusion | Female patient-female surgeon (concordant) | 5,417<br>(354)      | 0.4<br>(0.2 to 0.7) | -0.1<br>(-0.3 to +0.2) | 0.60  |
|                              | Female patient-male surgeon (discordant)   | 215,993<br>(6,486)  | 0.5<br>(0.5 to 0.5) | Reference              |       |
|                              | Male patient-male surgeon (concordant)     | 184,234<br>(6,602)  | 1.0<br>(1.0 to 1.1) | -0.2<br>(-0.6 to +0.3) | 0.42  |
|                              | Male patient-female surgeon (discordant)   | 4,633<br>(377)      | 1.2<br>(0.8 to 1.6) | Reference              |       |
| Colectomy                    | Female patient-female surgeon (concordant) | 20,956<br>(3,400)   | 5.2<br>(4.8 to 5.5) | -0.5<br>(-0.9 to -0.1) | 0.020 |
|                              | Female patient-male surgeon (discordant)   | 117,629<br>(13,956) | 5.7<br>(5.5 to 5.8) | Reference              |       |
|                              | Male patient-male surgeon (concordant)     | 83,210<br>(12,908)  | 6.6<br>(6.4 to 6.7) | +0.5<br>(-0.1 to +1.0) | 0.11  |

|                                |                                            |                    |                     |                        |        |
|--------------------------------|--------------------------------------------|--------------------|---------------------|------------------------|--------|
|                                | Male patient-female surgeon (discordant)   | 11,695<br>(2,525)  | 6.1<br>(5.6 to 6.6) | Reference              |        |
| Cholecystectomy                | Female patient-female surgeon (concordant) | 11,213<br>(2,721)  | 2.3<br>(1.9 to 2.6) | -0.2<br>(-0.5 to +0.2) | 0.27   |
|                                | Female patient-male surgeon (discordant)   | 73,588<br>(12,189) | 2.5<br>(2.3 to 2.6) | Reference              |        |
|                                | Male patient-male surgeon (concordant)     | 76,041<br>(12,029) | 2.6<br>(2.5 to 2.7) | +0.5<br>(+0.2 to +0.9) | 0.0017 |
|                                | Male patient-female surgeon (discordant)   | 11,159<br>(2,557)  | 2.1<br>(1.8 to 2.4) | Reference              |        |
| Coronary artery bypass surgery | Female patient-female surgeon (concordant) | 1,341<br>(145)     | 4.0<br>(2.6 to 5.5) | -0.8<br>(-2.3 to +0.7) | 0.27   |
|                                | Female patient-male surgeon (discordant)   | 39,956<br>(2,426)  | 4.9<br>(4.6 to 5.1) | Reference              |        |
|                                | Male patient-male surgeon (concordant)     | 114,158<br>(2,790) | 2.7<br>(2.6 to 2.8) | +0.1<br>(-0.6 to +0.7) | 0.84   |
|                                | Male patient-female surgeon (discordant)   | 3,954<br>(183)     | 2.6<br>(2.0 to 3.3) | Reference              |        |
| Lung resection                 | Female patient-female surgeon (concordant) | 3,783<br>(246)     | 1.3<br>(0.8 to 1.8) | -0.2<br>(-0.7 to +0.3) | 0.35   |

|                                  |                                            |                   |                     |                        |      |
|----------------------------------|--------------------------------------------|-------------------|---------------------|------------------------|------|
|                                  | Female patient-male surgeon (discordant)   | 41,188<br>(2,551) | 1.6<br>(1.4 to 1.7) | Reference              |      |
|                                  | Male patient-male surgeon (concordant)     | 36,870<br>(2,715) | 2.7<br>(2.6 to 2.9) | -0.1<br>(-0.8 to +0.6) | 0.81 |
|                                  | Male patient-female surgeon (discordant)   | 3,020<br>(243)    | 2.8<br>(2.1 to 3.5) | Reference              |      |
| Abdominal aortic aneurysm repair | Female patient-female surgeon (concordant) | 950<br>(356)      | 7.4<br>(5.2 to 9.5) | -0.1<br>(-2.3 to +2.2) | 0.96 |
|                                  | Female patient-male surgeon (discordant)   | 15,025<br>(3,251) | 7.5<br>(7.0 to 7.9) | Reference              |      |
|                                  | Male patient-male surgeon (concordant)     | 45,897<br>(4,009) | 4.4<br>(4.2 to 4.6) | -0.3<br>(-1.3 to +0.7) | 0.59 |
|                                  | Male patient-female surgeon (discordant)   | 2,970<br>(455)    | 4.7<br>(3.7 to 5.6) | Reference              |      |
| Appendectomy                     | Female patient-female surgeon (concordant) | 5,126<br>(2,209)  | 2.0<br>(1.6 to 2.4) | +0.1<br>(-0.4 to +0.5) | 0.83 |
|                                  | Female patient-male surgeon (discordant)   | 24,216<br>(9,195) | 1.9<br>(1.8 to 2.1) | Reference              |      |
|                                  | Male patient-male surgeon (concordant)     | 19,384<br>(8,466) | 2.8<br>(2.6 to 3.1) | +0.1<br>(-0.7 to +0.9) | 0.81 |

|                 |                                            |                   |                       |                         |       |
|-----------------|--------------------------------------------|-------------------|-----------------------|-------------------------|-------|
|                 | Male patient-female surgeon (discordant)   | 3,161<br>(1,633)  | 2.7<br>(2.1 to 3.4)   | Reference               |       |
| Cystectomy      | Female patient-female surgeon (concordant) | 306<br>(133)      | 0.9<br>(-0.8 to 2.5)  | -1.9<br>(-3.8 to -0.1)  | 0.042 |
|                 | Female patient-male surgeon (discordant)   | 2,994<br>(1,133)  | 2.8<br>(2.2 to 3.4)   | Reference               |       |
|                 | Male patient-male surgeon (concordant)     | 10,324<br>(1,945) | 3.1<br>(2.7 to 3.4)   | +0.4<br>(-1.2 to +1.9)  | 0.65  |
|                 | Male patient-female surgeon (discordant)   | 612<br>(127)      | 2.7<br>(1.2 to 4.2)   | Reference               |       |
| Thyroidectomy   | Female patient-female surgeon (concordant) | 410<br>(250)      | 0.3<br>(-0.5 to 1.1)  | -0.3<br>(-1.3 to +0.6)  | 0.47  |
|                 | Female patient-male surgeon (discordant)   | 2,198<br>(1,258)  | 0.6<br>(0.3 to 0.9)   | Reference               |       |
|                 | Male patient-male surgeon (concordant)     | 1,398<br>(886)    | 1.5<br>(0.8 to 2.2)   | +0.02<br>(-2.4 to +2.4) | 0.99  |
|                 | Male patient-female surgeon (discordant)   | 246<br>(150)      | 1.5<br>(-0.7 to 3.7)  | Reference               |       |
| Liver resection | Female patient-female surgeon (concordant) | 80<br>(58)        | 6.0<br>(-1.0 to 13.0) | +1.6<br>(-5.9 to +9.1)  | 0.67  |

|               |                                            |                   |                       |                        |       |
|---------------|--------------------------------------------|-------------------|-----------------------|------------------------|-------|
|               | Female patient-male surgeon (discordant)   | 897<br>(464)      | 4.4<br>(3.0 to 5.7)   | Reference              |       |
|               | Male patient-male surgeon (concordant)     | 1,156<br>(522)    | 6.0<br>(4.7 to 7.2)   | +4.2<br>(-0.6 to +9.0) | 0.086 |
|               | Male patient-female surgeon (discordant)   | 121<br>(62)       | 1.8<br>(-2.5 to 6.1)  | Reference              |       |
| Prostatectomy | Female patient-female surgeon (concordant) | N/A               | N/A                   | N/A                    | N/A   |
|               | Female patient-male surgeon (discordant)   | N/A               | N/A                   | Reference              |       |
|               | Male patient-male surgeon (concordant)     | 60,526<br>(5,479) | 0.9<br>(0.8 to 1.0)   | +0.3<br>(-0.3 to +1.0) | 0.28  |
|               | Male patient-female surgeon (discordant)   | 1,838<br>(365)    | 0.6<br>(-0.01 to 1.2) | Reference              |       |
| Hysterectomy  | Female patient-female surgeon (concordant) | 17,355<br>(3,533) | 0.9<br>(0.8 to 1.1)   | -0.1<br>(-0.3 to +0.1) | 0.37  |
|               | Female patient-male surgeon (discordant)   | 29,025<br>(5,372) | 1.0<br>(0.9 to 1.2)   | Reference              |       |
|               | Male patient-male surgeon (concordant)     | N/A               | N/A                   | N/A                    | N/A   |



|  |                                                 |     |     |           |
|--|-------------------------------------------------|-----|-----|-----------|
|  | Male patient-<br>female surgeon<br>(discordant) | N/A | N/A | Reference |
|--|-------------------------------------------------|-----|-----|-----------|

Adjusted for patient characteristics (age, race and ethnicity, 27 chronic conditions, ICD-10-PCS procedure codes, procedure type [for the analysis pooling the 14 procedure types], procedure electiveness, weekend versus weekday, month and year of surgery, and Medicaid coverage), surgeon characteristics (years of experience and operative volume), and hospital fixed effects (indicator variables for each hospital, effectively comparing patients treated at the same hospital).

Abbreviation: pp = percentage point.

**eTable 14. Association between patient-surgeon gender concordance and patient adjusted 30-day mortality rates, additionally adjusting for social deprivation index (elective and non-elective procedures combined)**

|                             |                                                   | No. of patients<br>(No. of<br>surgeons) | Adjusted mortality<br>rate, % (95%CI) | Adjusted risk difference,<br>pp (95%CI) | P-value |
|-----------------------------|---------------------------------------------------|-----------------------------------------|---------------------------------------|-----------------------------------------|---------|
| 14 procedures<br>(combined) | Female patient-<br>female surgeon<br>(concordant) | 84,878<br>(8,518)                       | 1.3<br>(1.2 to 1.5)                   | -0.2<br>(-0.3 to -0.04)                 | 0.011   |
|                             | Female patient-<br>male surgeon<br>(discordant)   | 1,541,640<br>(44,204)                   | 1.5<br>(1.5 to 1.5)                   | Reference                               |         |
|                             | Male patient-<br>male surgeon<br>(concordant)     | 1,182,339<br>(43,642)                   | 2.0<br>(2.0 to 2.0)                   | +0.3<br>(+0.1 to +0.4)                  | 0.0011  |
|                             | Male patient-<br>female surgeon<br>(discordant)   | 51,954<br>(5,344)                       | 1.7<br>(1.6 to 1.9)                   | Reference                               |         |
| Knee replacement            | Female patient-<br>female surgeon<br>(concordant) | 8,635<br>(375)                          | 0.2<br>(0.1 to 0.3)                   | +0.03<br>(-0.1 to +0.2)                 | 0.59    |
|                             | Female patient-<br>male surgeon<br>(discordant)   | 534,981<br>(10,621)                     | 0.2<br>(0.1 to 0.2)                   | Reference                               |         |
|                             | Male patient-<br>male surgeon<br>(concordant)     | 308,348<br>(10,188)                     | 0.3<br>(0.2 to 0.3)                   | +0.1<br>(-0.1 to +0.3)                  | 0.16    |
|                             | Male patient-<br>female surgeon<br>(discordant)   | 4,384<br>(332)                          | 0.1<br>(-0.03 to 0.3)                 | Reference                               |         |
| Hip replacement             | Female patient-<br>female surgeon<br>(concordant) | 10,237<br>(791)                         | 1.8<br>(1.4 to 2.2)                   | +0.2<br>(-0.2 to +0.5)                  | 0.39    |

|                                 |                                            |                     |                     |                        |        |
|---------------------------------|--------------------------------------------|---------------------|---------------------|------------------------|--------|
|                                 | Female patient-male surgeon (discordant)   | 451,359<br>(14,143) | 1.6<br>(1.6 to 1.7) | Reference              |        |
|                                 | Male patient-male surgeon (concordant)     | 251,223<br>(12,901) | 2.3<br>(2.2 to 2.4) | +0.3<br>(-0.4 to +1.0) | 0.38   |
|                                 | Male patient-female surgeon (discordant)   | 4,925<br>(658)      | 2.0<br>(1.4 to 2.7) | Reference              |        |
| Laminectomy<br>or Spinal Fusion | Female patient-female surgeon (concordant) | 5,351<br>(353)      | 0.4<br>(0.2 to 0.7) | -0.1<br>(-0.3 to +0.2) | 0.61   |
|                                 | Female patient-male surgeon (discordant)   | 213,170<br>(6,474)  | 0.5<br>(0.5 to 0.5) | Reference              |        |
|                                 | Male patient-male surgeon (concordant)     | 181,213<br>(6,593)  | 1.0<br>(1.0 to 1.1) | -0.2<br>(-0.6 to +0.3) | 0.42   |
|                                 | Male patient-female surgeon (discordant)   | 4,544<br>(372)      | 1.2<br>(0.8 to 1.6) | Reference              |        |
| Colectomy                       | Female patient-female surgeon (concordant) | 20,649<br>(3,386)   | 5.1<br>(4.7 to 5.4) | -0.6<br>(-1.0 to -0.2) | 0.0034 |
|                                 | Female patient-male surgeon (discordant)   | 116,163<br>(13,906) | 5.7<br>(5.5 to 5.8) | Reference              |        |
|                                 | Male patient-male surgeon (concordant)     | 81,760<br>(12,826)  | 6.5<br>(6.4 to 6.7) | +0.5<br>(-0.1 to +1.0) | 0.12   |

|                                |                                            |                    |                     |                         |        |
|--------------------------------|--------------------------------------------|--------------------|---------------------|-------------------------|--------|
|                                | Male patient-female surgeon (discordant)   | 11,490<br>(2,512)  | 6.1<br>(5.5 to 6.6) | Reference               |        |
| Cholecystectomy                | Female patient-female surgeon (concordant) | 11,055<br>(2,703)  | 2.2<br>(1.9 to 2.5) | -0.2<br>(-0.6 to +0.1)  | 0.19   |
|                                | Female patient-male surgeon (discordant)   | 72,496<br>(12,155) | 2.5<br>(2.3 to 2.6) | Reference               |        |
|                                | Male patient-male surgeon (concordant)     | 74,745<br>(11,991) | 2.6<br>(2.5 to 2.7) | +0.6<br>(+0.2 to +0.9)  | 0.0010 |
|                                | Male patient-female surgeon (discordant)   | 10,976<br>(2,543)  | 2.1<br>(1.8 to 2.4) | Reference               |        |
| Coronary artery bypass surgery | Female patient-female surgeon (concordant) | 1,322<br>(144)     | 3.9<br>(2.5 to 5.4) | -0.9<br>(-2.4 to +0.6)  | 0.23   |
|                                | Female patient-male surgeon (discordant)   | 39,403<br>(2,422)  | 4.9<br>(4.7 to 5.1) | Reference               |        |
|                                | Male patient-male surgeon (concordant)     | 112,242<br>(2,780) | 2.7<br>(2.6 to 2.8) | +0.03<br>(-0.7 to +0.7) | 0.94   |
|                                | Male patient-female surgeon (discordant)   | 3,881<br>(181)     | 2.7<br>(2.0 to 3.3) | Reference               |        |
| Lung resection                 | Female patient-female surgeon (concordant) | 3,751<br>(246)     | 1.3<br>(0.8 to 1.8) | -0.2<br>(-0.8 to +0.3)  | 0.34   |

|                                  |                                            |                   |                     |                           |      |
|----------------------------------|--------------------------------------------|-------------------|---------------------|---------------------------|------|
|                                  | Female patient-male surgeon (discordant)   | 40,773<br>(2,541) | 1.5<br>(1.4 to 1.7) | Reference                 |      |
|                                  | Male patient-male surgeon (concordant)     | 36,363<br>(2,699) | 2.7<br>(2.6 to 2.9) | -0.1<br>(-0.9 to +0.6)    | 0.71 |
|                                  | Male patient-female surgeon (discordant)   | 2,979<br>(242)    | 2.9<br>(2.2 to 3.6) | Reference                 |      |
| Abdominal aortic aneurysm repair | Female patient-female surgeon (concordant) | 937<br>(356)      | 7.1<br>(4.9 to 9.3) | -0.4<br>(-2.6 to +1.9)    | 0.76 |
|                                  | Female patient-male surgeon (discordant)   | 14,841<br>(3,235) | 7.4<br>(7.0 to 7.9) | Reference                 |      |
|                                  | Male patient-male surgeon (concordant)     | 45,216<br>(3,999) | 4.4<br>(4.2 to 4.6) | -0.08<br>(-1.11 to +0.94) | 0.87 |
|                                  | Male patient-female surgeon (discordant)   | 2,909<br>(454)    | 4.5<br>(3.5 to 5.5) | Reference                 |      |
| Appendectomy                     | Female patient-female surgeon (concordant) | 5,059<br>(2,199)  | 2.2<br>(1.8 to 2.6) | +0.3<br>(-0.2 to +0.8)    | 0.20 |
|                                  | Female patient-male surgeon (discordant)   | 23,862<br>(9,153) | 1.9<br>(1.7 to 2.1) | Reference                 |      |
|                                  | Male patient-male surgeon (concordant)     | 19,049<br>(8,405) | 2.8<br>(2.6 to 3.1) | +0.1<br>(-0.7 to +0.8)    | 0.89 |

|                 |                                            |                   |                       |                           |       |
|-----------------|--------------------------------------------|-------------------|-----------------------|---------------------------|-------|
|                 | Male patient-female surgeon (discordant)   | 3,103<br>(1,615)  | 2.8<br>(2.1 to 3.5)   | Reference                 |       |
| Cystectomy      | Female patient-female surgeon (concordant) | 305<br>(133)      | 1.0<br>(-0.7 to 2.7)  | -1.8<br>(-3.7 to +0.1)    | 0.059 |
|                 | Female patient-male surgeon (discordant)   | 2,957<br>(1,124)  | 2.8<br>(2.2 to 3.4)   | Reference                 |       |
|                 | Male patient-male surgeon (concordant)     | 10,194<br>(1,938) | 3.1<br>(2.8 to 3.4)   | +0.3<br>(-1.3 to +1.9)    | 0.75  |
|                 | Male patient-female surgeon (discordant)   | 601<br>(125)      | 2.8<br>(1.3 to 4.4)   | Reference                 |       |
| Thyroidectomy   | Female patient-female surgeon (concordant) | 402<br>(245)      | 0.3<br>(-0.5 to 1.1)  | -0.35<br>(-1.29 to +0.59) | 0.47  |
|                 | Female patient-male surgeon (discordant)   | 2,163<br>(1,244)  | 0.6<br>(0.3 to 0.9)   | Reference                 |       |
|                 | Male patient-male surgeon (concordant)     | 1,371<br>(869)    | 1.6<br>(0.9 to 2.2)   | -0.02<br>(-2.5 to +2.5)   | 0.99  |
|                 | Male patient-female surgeon (discordant)   | 238<br>(146)      | 1.6<br>(-0.7 to 3.8)  | Reference                 |       |
| Liver resection | Female patient-female surgeon (concordant) | 78<br>(56)        | 5.9<br>(-1.3 to 13.1) | +1.4<br>(-6.3 to +9.1)    | 0.71  |

|               |                                            |                   |                      |                        |      |
|---------------|--------------------------------------------|-------------------|----------------------|------------------------|------|
|               | Female patient-male surgeon (discordant)   | 882<br>(460)      | 4.5<br>(3.1 to 5.8)  | Reference              |      |
|               | Male patient-male surgeon (concordant)     | 1,147<br>(521)    | 5.9<br>(4.6 to 7.2)  | +4.0<br>(-0.9 to +8.8) | 0.11 |
|               | Male patient-female surgeon (discordant)   | 118<br>(60)       | 1.9<br>(-2.4 to 6.3) | Reference              |      |
| Prostatectomy | Female patient-female surgeon (concordant) | N/A               | N/A                  | N/A                    | N/A  |
|               | Female patient-male surgeon (discordant)   | N/A               | N/A                  | Reference              |      |
|               | Male patient-male surgeon (concordant)     | 59,468<br>(5,456) | 0.9<br>(0.8 to 1.0)  | +0.2<br>(-0.4 to +0.9) | 0.46 |
|               | Male patient-female surgeon (discordant)   | 1,806<br>(362)    | 0.7<br>(0.1 to 1.3)  | Reference              |      |
| Hysterectomy  | Female patient-female surgeon (concordant) | 17,097<br>(3,507) | 0.9<br>(0.7 to 1.1)  | -0.1<br>(-0.4 to +0.1) | 0.30 |
|               | Female patient-male surgeon (discordant)   | 28,590<br>(5,338) | 1.0<br>(0.9 to 1.2)  | Reference              |      |
|               | Male patient-male surgeon (concordant)     | N/A               | N/A                  | N/A                    | N/A  |

|  |                                                 |     |     |           |
|--|-------------------------------------------------|-----|-----|-----------|
|  | Male patient-<br>female surgeon<br>(discordant) | N/A | N/A | Reference |
|--|-------------------------------------------------|-----|-----|-----------|

Adjusted for patient characteristics (age, race and ethnicity, 27 chronic conditions, procedure type [for the analysis pooling the 14 procedure types], procedure electiveness, weekend versus weekday, month and year of surgery, Medicaid coverage, and social deprivation index), surgeon characteristics (years of experience and operative volume), and hospital fixed effects (indicator variables for each hospital, effectively comparing patients treated at the same hospital).

Abbreviation: pp = percentage point.



**eTable 15. Association between patient-surgeon gender concordance and patient adjusted 30-day mortality rates, additionally adjusting for claims-based measure of frailty (elective and non-elective procedures combined)**

|                             |                                            | No. of patients<br>(No. of surgeons) | Adjusted mortality rate, % (95%CI) | Adjusted risk difference, pp (95%CI) | P-value |
|-----------------------------|--------------------------------------------|--------------------------------------|------------------------------------|--------------------------------------|---------|
| 14 procedures<br>(combined) | Female patient-female surgeon (concordant) | 65,700<br>(7,650)                    | 1.4<br>(1.2 to 1.5)                | -0.1<br>(-0.2 to +0.03)              | 0.13    |
|                             | Female patient-male surgeon (discordant)   | 1,162,917<br>(42,032)                | 1.5<br>(1.5 to 1.5)                | Reference                            |         |
|                             | Male patient-male surgeon (concordant)     | 892,907<br>(41,929)                  | 2.0<br>(2.0 to 2.1)                | +0.4<br>(+0.2 to +0.6)               | 0.0001  |
|                             | Male patient-female surgeon (discordant)   | 40,797<br>(5,061)                    | 1.7<br>(1.5 to 1.8)                | Reference                            |         |
| Knee replacement            | Female patient-female surgeon (concordant) | 6,621<br>(351)                       | 0.2<br>(0.0 to 0.3)                | +0.02<br>(-0.1 to +0.2)              | 0.73    |
|                             | Female patient-male surgeon (discordant)   | 396,398<br>(10,238)                  | 0.2<br>(0.1 to 0.2)                | Reference                            |         |
|                             | Male patient-male surgeon (concordant)     | 228,258<br>(9,801)                   | 0.3<br>(0.2 to 0.3)                | +0.2<br>(+0.1 to +0.4)               | 0.0075  |
|                             | Male patient-female surgeon (discordant)   | 3,331<br>(309)                       | 0.04<br>(-0.1 to 0.2)              | Reference                            |         |
| Hip replacement             | Female patient-female surgeon (concordant) | 8,146<br>(730)                       | 1.8<br>(1.4 to 2.2)                | +0.2<br>(-0.2 to +0.6)               | 0.34    |

|                                 |                                            |                     |                     |                         |       |
|---------------------------------|--------------------------------------------|---------------------|---------------------|-------------------------|-------|
|                                 | Female patient-male surgeon (discordant)   | 348,580<br>(13,543) | 1.6<br>(1.5 to 1.6) | Reference               |       |
|                                 | Male patient-male surgeon (concordant)     | 195,441<br>(12,275) | 2.2<br>(2.2 to 2.3) | +0.03<br>(-0.7 to +0.8) | 0.94  |
|                                 | Male patient-female surgeon (discordant)   | 3,909<br>(615)      | 2.2<br>(1.4 to 2.9) | Reference               |       |
| Laminectomy<br>or Spinal Fusion | Female patient-female surgeon (concordant) | 4,024<br>(330)      | 0.4<br>(0.1 to 0.6) | -0.2<br>(-0.5 to +0.1)  | 0.29  |
|                                 | Female patient-male surgeon (discordant)   | 159,813<br>(6,209)  | 0.5<br>(0.5 to 0.6) | Reference               |       |
|                                 | Male patient-male surgeon (concordant)     | 136,765<br>(6,278)  | 1.1<br>(1.0 to 1.1) | -0.2<br>(-0.7 to +0.4)  | 0.55  |
|                                 | Male patient-female surgeon (discordant)   | 3,495<br>(354)      | 1.2<br>(0.7 to 1.7) | Reference               |       |
| Colectomy                       | Female patient-female surgeon (concordant) | 16,270<br>(3,147)   | 5.1<br>(4.7 to 5.5) | -0.6<br>(-1.0 to -0.1)  | 0.016 |
|                                 | Female patient-male surgeon (discordant)   | 88,146<br>(12,829)  | 5.7<br>(5.5 to 5.8) | Reference               |       |
|                                 | Male patient-male surgeon (concordant)     | 62,135<br>(11,727)  | 6.5<br>(6.3 to 6.7) | +0.6<br>(-0.02 to +1.3) | 0.056 |

|                                |                                            |                    |                     |                        |        |
|--------------------------------|--------------------------------------------|--------------------|---------------------|------------------------|--------|
|                                | Male patient-female surgeon (discordant)   | 9,096<br>(2,291)   | 5.9<br>(5.3 to 6.5) | Reference              |        |
| Cholecystectomy                | Female patient-female surgeon (concordant) | 8,632<br>(2,473)   | 2.3<br>(1.9 to 2.7) | -0.1<br>(-0.5 to +0.3) | 0.67   |
|                                | Female patient-male surgeon (discordant)   | 54,830<br>(11,289) | 2.4<br>(2.2 to 2.5) | Reference              |        |
|                                | Male patient-male surgeon (concordant)     | 56,664<br>(11,148) | 2.7<br>(2.5 to 2.8) | +0.7<br>(+0.3 to +1.1) | 0.0003 |
|                                | Male patient-female surgeon (discordant)   | 8,611<br>(2,330)   | 2.0<br>(1.6 to 2.3) | Reference              |        |
| Coronary artery bypass surgery | Female patient-female surgeon (concordant) | 1,076<br>(137)     | 3.8<br>(2.2 to 5.4) | -1.1<br>(-2.7 to +0.6) | 0.20   |
|                                | Female patient-male surgeon (discordant)   | 29,412<br>(2,340)  | 4.9<br>(4.6 to 5.1) | Reference              |        |
|                                | Male patient-male surgeon (concordant)     | 85,730<br>(2,628)  | 2.7<br>(2.5 to 2.8) | -0.1<br>(-0.9 to +0.6) | 0.75   |
|                                | Male patient-female surgeon (discordant)   | 3,129<br>(164)     | 2.8<br>(2.1 to 3.5) | Reference              |        |
| Lung resection                 | Female patient-female surgeon (concordant) | 2,967<br>(227)     | 1.4<br>(0.8 to 1.9) | -0.1<br>(-0.7 to +0.5) | 0.68   |

|                                  |                                            |                   |                      |                         |       |
|----------------------------------|--------------------------------------------|-------------------|----------------------|-------------------------|-------|
|                                  | Female patient-male surgeon (discordant)   | 31,198<br>(2,311) | 1.5<br>(1.4 to 1.6)  | Reference               |       |
|                                  | Male patient-male surgeon (concordant)     | 27,484<br>(2,435) | 2.7<br>(2.5 to 2.8)  | -0.1<br>(-0.9 to +0.8)  | 0.90  |
|                                  | Male patient-female surgeon (discordant)   | 2,340<br>(224)    | 2.7<br>(1.9 to 3.5)  | Reference               |       |
| Abdominal aortic aneurysm repair | Female patient-female surgeon (concordant) | 746<br>(314)      | 7.6<br>(5.1 to 10.2) | +0.1<br>(-2.5 to +2.8)  | 0.92  |
|                                  | Female patient-male surgeon (discordant)   | 11,137<br>(2,939) | 7.5<br>(7.0 to 8.0)  | Reference               |       |
|                                  | Male patient-male surgeon (concordant)     | 33,813<br>(3,697) | 4.4<br>(4.2 to 4.6)  | -0.2<br>(-1.4 to +0.9)  | 0.71  |
|                                  | Male patient-female surgeon (discordant)   | 2,347<br>(434)    | 4.6<br>(3.5 to 5.7)  | Reference               |       |
| Appendectomy                     | Female patient-female surgeon (concordant) | 3,941<br>(1,937)  | 2.3<br>(1.9 to 2.8)  | +0.5<br>(-0.01 to +1.1) | 0.056 |
|                                  | Female patient-male surgeon (discordant)   | 18,171<br>(8,078) | 1.8<br>(1.6 to 2.0)  | Reference               |       |
|                                  | Male patient-male surgeon (concordant)     | 14,439<br>(7,291) | 3.0<br>(2.7 to 3.3)  | +0.2<br>(-0.7 to +1.1)  | 0.70  |

|                 |                                            |                  |                       |                         |       |
|-----------------|--------------------------------------------|------------------|-----------------------|-------------------------|-------|
|                 | Male patient-female surgeon (discordant)   | 2,419<br>(1,416) | 2.8<br>(2.0 to 3.6)   | Reference               |       |
| Cystectomy      | Female patient-female surgeon (concordant) | 228<br>(111)     | 0.3<br>(-1.8 to 2.3)  | -2.4<br>(-4.7 to -0.04) | 0.047 |
|                 | Female patient-male surgeon (discordant)   | 2,220<br>(940)   | 2.7<br>(2.0 to 3.3)   | Reference               |       |
|                 | Male patient-male surgeon (concordant)     | 7,656<br>(1,667) | 3.0<br>(2.6 to 3.4)   | +0.4<br>(-1.4 to +2.2)  | 0.65  |
|                 | Male patient-female surgeon (discordant)   | 465<br>(111)     | 2.6<br>(0.9 to 4.3)   | Reference               |       |
| Thyroidectomy   | Female patient-female surgeon (concordant) | 296<br>(190)     | 0.2<br>(-1.0 to 1.4)  | -0.6<br>(-2.1 to +0.9)  | 0.40  |
|                 | Female patient-male surgeon (discordant)   | 1,534<br>(943)   | 0.8<br>(0.4 to 1.3)   | Reference               |       |
|                 | Male patient-male surgeon (concordant)     | 1,034<br>(694)   | 1.8<br>(0.9 to 2.6)   | +1.5<br>(-1.1 to +4.1)  | 0.25  |
|                 | Male patient-female surgeon (discordant)   | 185<br>(116)     | 0.3<br>(-1.9 to 2.4)  | Reference               |       |
| Liver resection | Female patient-female surgeon (concordant) | 60<br>(43)       | 12.2<br>(2.5 to 21.8) | +7.7<br>(-2.5 to +18.0) | 0.14  |

|               |                                            |                   |                      |                        |       |
|---------------|--------------------------------------------|-------------------|----------------------|------------------------|-------|
|               | Female patient-male surgeon (discordant)   | 674<br>(391)      | 4.4<br>(2.8 to 6.0)  | Reference              |       |
|               | Male patient-male surgeon (concordant)     | 890<br>(449)      | 6.2<br>(4.8 to 7.6)  | +4.3<br>(-0.7 to +9.2) | 0.091 |
|               | Male patient-female surgeon (discordant)   | 99<br>(57)        | 1.9<br>(-2.5 to 6.4) | Reference              |       |
| Prostatectomy | Female patient-female surgeon (concordant) | N/A               | N/A                  | N/A                    | N/A   |
|               | Female patient-male surgeon (discordant)   | N/A               | N/A                  | Reference              |       |
|               | Male patient-male surgeon (concordant)     | 42,598<br>(4,975) | 0.9<br>(0.9 to 1.0)  | +0.4<br>(-0.3 to +1.1) | 0.26  |
|               | Male patient-female surgeon (discordant)   | 1,371<br>(311)    | 0.6<br>(-0.1 to 1.2) | Reference              |       |
| Hysterectomy  | Female patient-female surgeon (concordant) | 12,693<br>(2,876) | 0.9<br>(0.7 to 1.1)  | -0.2<br>(-0.4 to +0.1) | 0.27  |
|               | Female patient-male surgeon (discordant)   | 20,804<br>(4,386) | 1.0<br>(0.9 to 1.2)  | Reference              |       |
|               | Male patient-male surgeon (concordant)     | N/A               | N/A                  | N/A                    | N/A   |

|  |                                                 |     |     |           |
|--|-------------------------------------------------|-----|-----|-----------|
|  | Male patient-<br>female surgeon<br>(discordant) | N/A | N/A | Reference |
|--|-------------------------------------------------|-----|-----|-----------|

Adjusted for patient characteristics (age, race and ethnicity, 27 chronic conditions, claims-based measure of frailty, procedure type [for the analysis pooling the 14 procedure types], procedure electiveness, weekend versus weekday, month and year of surgery, and Medicaid coverage), surgeon characteristics (years of experience and operative volume), and hospital fixed effects (indicator variables for each hospital, effectively comparing patients treated at the same hospital).

Abbreviation: pp = percentage point.

**eTable 16. Association between patient-surgeon gender concordance and patient adjusted 30-day mortality rates for major or minor teaching hospitals (elective and non-elective procedures combined)**

|                             |                                                   | No. of patients<br>(No. of<br>surgeons) | Adjusted mortality<br>rate, % (95%CI) | Adjusted risk difference,<br>pp (95%CI) | P-value |
|-----------------------------|---------------------------------------------------|-----------------------------------------|---------------------------------------|-----------------------------------------|---------|
| 14 procedures<br>(combined) | Female patient-<br>female surgeon<br>(concordant) | 63,410<br>(6,714)                       | 1.3<br>(1.2 to 1.5)                   | -0.2<br>(-0.3 to -0.1)                  | 0.0051  |
|                             | Female patient-<br>male surgeon<br>(discordant)   | 1,046,462<br>(34,542)                   | 1.5<br>(1.5 to 1.5)                   | Reference                               |         |
|                             | Male patient-<br>male surgeon<br>(concordant)     | 829,426<br>(34,040)                     | 2.1<br>(2.0 to 2.1)                   | +0.5<br>(+0.3 to +0.7)                  | <0.0001 |
|                             | Male patient-<br>female surgeon<br>(discordant)   | 38,626<br>(4,283)                       | 1.6<br>(1.4 to 1.8)                   | Reference                               |         |
| Knee replacement            | Female patient-<br>female surgeon<br>(concordant) | 5,102<br>(267)                          | 0.2<br>(0.02 to 0.3)                  | +0.02<br>(-0.1 to +0.2)                 | 0.77    |
|                             | Female patient-<br>male surgeon<br>(discordant)   | 340,622<br>(7,489)                      | 0.2<br>(0.1 to 0.2)                   | Reference                               |         |
|                             | Male patient-<br>male surgeon<br>(concordant)     | 194,317<br>(6,988)                      | 0.3<br>(0.2 to 0.3)                   | +0.1<br>(-0.1 to +0.3)                  | 0.44    |
|                             | Male patient-<br>female surgeon<br>(discordant)   | 2,526<br>(231)                          | 0.2<br>(-0.05 to 0.4)                 | Reference                               |         |
| Hip replacement             | Female patient-<br>female surgeon<br>(concordant) | 6,746<br>(608)                          | 1.7<br>(1.2 to 2.1)                   | +0.1<br>(-0.4 to +0.5)                  | 0.73    |



|                              |                                            |                     |                     |                         |       |
|------------------------------|--------------------------------------------|---------------------|---------------------|-------------------------|-------|
|                              | Female patient-male surgeon (discordant)   | 298,454<br>(10,539) | 1.6<br>(1.5 to 1.6) | Reference               |       |
|                              | Male patient-male surgeon (concordant)     | 166,651<br>(9,290)  | 2.2<br>(2.2 to 2.3) | +0.8<br>(+0.02 to +1.5) | 0.045 |
|                              | Male patient-female surgeon (discordant)   | 3,366<br>(480)      | 1.5<br>(0.8 to 2.2) | Reference               |       |
| Laminectomy or Spinal Fusion | Female patient-female surgeon (concordant) | 3,695<br>(310)      | 0.5<br>(0.2 to 0.8) | -0.1<br>(-0.4 to +0.2)  | 0.64  |
|                              | Female patient-male surgeon (discordant)   | 154,444<br>(5,475)  | 0.5<br>(0.5 to 0.6) | Reference               |       |
|                              | Male patient-male surgeon (concordant)     | 132,535<br>(5,561)  | 1.1<br>(1.1 to 1.2) | -0.2<br>(-0.7 to +0.4)  | 0.53  |
|                              | Male patient-female surgeon (discordant)   | 3,161<br>(331)      | 1.3<br>(0.8 to 1.8) | Reference               |       |
| Colectomy                    | Female patient-female surgeon (concordant) | 15,839<br>(2,639)   | 4.9<br>(4.5 to 5.3) | -0.6<br>(-1.0 to -0.1)  | 0.011 |
|                              | Female patient-male surgeon (discordant)   | 81,476<br>(10,137)  | 5.5<br>(5.3 to 5.6) | Reference               |       |
|                              | Male patient-male surgeon (concordant)     | 57,238<br>(9,207)   | 6.5<br>(6.3 to 6.7) | +0.8<br>(+0.1 to +1.4)  | 0.020 |

|                                |                                            |                   |                     |                        |         |
|--------------------------------|--------------------------------------------|-------------------|---------------------|------------------------|---------|
|                                | Male patient-female surgeon (discordant)   | 8,777<br>(1,898)  | 5.7<br>(5.1 to 6.3) | Reference              |         |
| Cholecystectomy                | Female patient-female surgeon (concordant) | 7,722<br>(2,069)  | 2.2<br>(1.8 to 2.5) | -0.2<br>(-0.7 to +0.2) | 0.24    |
|                                | Female patient-male surgeon (discordant)   | 48,010<br>(8,705) | 2.4<br>(2.3 to 2.6) | Reference              |         |
|                                | Male patient-male surgeon (concordant)     | 50,318<br>(8,588) | 2.6<br>(2.5 to 2.8) | +0.8<br>(+0.4 to +1.2) | <0.0001 |
|                                | Male patient-female surgeon (discordant)   | 7,684<br>(1,906)  | 1.8<br>(1.5 to 2.1) | Reference              |         |
| Coronary artery bypass surgery | Female patient-female surgeon (concordant) | 7,722<br>(2,069)  | 3.7<br>(2.1 to 5.3) | -1.2<br>(-2.8 to +0.5) | 0.16    |
|                                | Female patient-male surgeon (discordant)   | 48,010<br>(8,705) | 4.9<br>(4.6 to 5.1) | Reference              |         |
|                                | Male patient-male surgeon (concordant)     | 50,318<br>(8,588) | 2.6<br>(2.5 to 2.7) | +0.2<br>(-0.5 to +0.9) | 0.57    |
|                                | Male patient-female surgeon (discordant)   | 7,684<br>(1,906)  | 2.4<br>(1.7 to 3.1) | Reference              |         |
| Lung resection                 | Female patient-female surgeon (concordant) | 3,448<br>(216)    | 1.1<br>(0.7 to 1.6) | -0.3<br>(-0.8 to +0.2) | 0.20    |

|                                  |                                            |                   |                     |                        |       |
|----------------------------------|--------------------------------------------|-------------------|---------------------|------------------------|-------|
|                                  | Female patient-male surgeon (discordant)   | 34,551<br>(2,063) | 1.5<br>(1.3 to 1.6) | Reference              |       |
|                                  | Male patient-male surgeon (concordant)     | 30,409<br>(2,185) | 2.5<br>(2.3 to 2.7) | -0.1<br>(-0.8 to +0.7) | 0.90  |
|                                  | Male patient-female surgeon (discordant)   | 2,729<br>(210)    | 2.6<br>(1.9 to 3.3) | Reference              |       |
| Abdominal aortic aneurysm repair | Female patient-female surgeon (concordant) | 826<br>(311)      | 7.2<br>(5.0 to 9.4) | -0.5<br>(-2.7 to +2.0) | 0.77  |
|                                  | Female patient-male surgeon (discordant)   | 12,321<br>(2,662) | 7.6<br>(7.1 to 8.0) | Reference              |       |
|                                  | Male patient-male surgeon (concordant)     | 36,942<br>(3,284) | 4.5<br>(4.3 to 4.7) | +0.2<br>(-0.8 to +1.3) | 0.67  |
|                                  | Male patient-female surgeon (discordant)   | 2,569<br>(394)    | 4.3<br>(3.3 to 5.3) | Reference              |       |
| Appendectomy                     | Female patient-female surgeon (concordant) | 3,730<br>(1,678)  | 2.1<br>(1.6 to 2.5) | +0.3<br>(-0.2 to +0.8) | 0.29  |
|                                  | Female patient-male surgeon (discordant)   | 15,990<br>(6,330) | 1.8<br>(1.6 to 2.0) | Reference              |       |
|                                  | Male patient-male surgeon (concordant)     | 11,984<br>(5,647) | 3.1<br>(2.8 to 3.4) | +0.9<br>(+0.1 to +1.8) | 0.040 |

|                 |                                            |                  |                       |                         |       |
|-----------------|--------------------------------------------|------------------|-----------------------|-------------------------|-------|
|                 | Male patient-female surgeon (discordant)   | 2,112<br>(1,167) | 2.2<br>(1.4 to 3.0)   | Reference               |       |
| Cystectomy      | Female patient-female surgeon (concordant) | 296<br>(124)     | 0.8<br>(-0.8 to 2.4)  | -1.8<br>(-3.7 to +0.01) | 0.051 |
|                 | Female patient-male surgeon (discordant)   | 2,662<br>(957)   | 2.7<br>(2.1 to 3.3)   | Reference               |       |
|                 | Male patient-male surgeon (concordant)     | 9,276<br>(1,629) | 3.0<br>(2.7 to 3.3)   | +0.4<br>(-1.1 to +1.9)  | 0.60  |
|                 | Male patient-female surgeon (discordant)   | 594<br>(115)     | 2.6<br>(1.2 to 4.0)   | Reference               |       |
| Thyroidectomy   | Female patient-female surgeon (concordant) | 345<br>(202)     | 0.02<br>(-0.8 to 0.8) | -0.5<br>(-1.4 to +0.5)  | 0.33  |
|                 | Female patient-male surgeon (discordant)   | 1,795<br>(976)   | 0.5<br>(0.2 to 0.8)   | Reference               |       |
|                 | Male patient-male surgeon (concordant)     | 1,180<br>(705)   | 1.6<br>(0.9 to 2.3)   | -0.3<br>(-2.6 to +2.0)  | 0.82  |
|                 | Male patient-female surgeon (discordant)   | 226<br>(133)     | 1.9<br>(-0.2 to 3.9)  | Reference               |       |
| Liver resection | Female patient-female surgeon (concordant) | 78<br>(56)       | 4.8<br>(-1.9 to 11.5) | +0.3<br>(-6.9 to +7.6)  | 0.93  |

|               |                                            |                   |                      |                        |       |
|---------------|--------------------------------------------|-------------------|----------------------|------------------------|-------|
|               | Female patient-male surgeon (discordant)   | 807<br>(420)      | 4.5<br>(3.1 to 5.9)  | Reference              |       |
|               | Male patient-male surgeon (concordant)     | 1,060<br>(482)    | 5.5<br>(4.2 to 6.8)  | +4.0<br>(-0.6 to +8.7) | 0.089 |
|               | Male patient-female surgeon (discordant)   | 118<br>(59)       | 1.5<br>(-2.7 to 5.7) | Reference              |       |
| Prostatectomy | Female patient-female surgeon (concordant) | N/A               | N/A                  | N/A                    | N/A   |
|               | Female patient-male surgeon (discordant)   | N/A               | N/A                  | Reference              |       |
|               | Male patient-male surgeon (concordant)     | 46,814<br>(4,210) | 0.9<br>(0.8 to 1.0)  | +0.3<br>(-0.3 to +1.0) | 0.33  |
|               | Male patient-female surgeon (discordant)   | 1,534<br>(287)    | 0.6<br>(-0.1 to 1.2) | Reference              |       |
| Hysterectomy  | Female patient-female surgeon (concordant) | 14,476<br>(2,666) | 0.9<br>(0.7 to 1.0)  | -0.2<br>(-0.4 to +0.1) | 0.14  |
|               | Female patient-male surgeon (discordant)   | 23,741<br>(3,868) | 1.1<br>(0.9 to 1.2)  | Reference              |       |
|               | Male patient-male surgeon (concordant)     | N/A               | N/A                  | N/A                    | N/A   |

|  |                                                 |     |     |           |
|--|-------------------------------------------------|-----|-----|-----------|
|  | Male patient-<br>female surgeon<br>(discordant) | N/A | N/A | Reference |
|--|-------------------------------------------------|-----|-----|-----------|

Adjusted for patient characteristics (age, race and ethnicity, 27 chronic conditions, procedure type [for the analysis pooling the 14 procedure types], procedure electiveness, weekend versus weekday, month and year of surgery, and Medicaid coverage), surgeon characteristics (years of experience and operative volume), and hospital fixed effects (indicator variables for each hospital, effectively comparing patients treated at the same hospital).

Abbreviation: pp = percentage point.

**eTable 17. Association between patient-surgeon gender concordance and patient adjusted 30-day mortality rates for non-teaching hospitals (elective and non-elective procedures combined)**

|                             |                                                   | No. of patients<br>(No. of<br>surgeons) | Adjusted mortality<br>rate, % (95%CI) | Adjusted risk difference,<br>pp (95%CI) | P-value |
|-----------------------------|---------------------------------------------------|-----------------------------------------|---------------------------------------|-----------------------------------------|---------|
| 14 procedures<br>(combined) | Female patient-<br>female surgeon<br>(concordant) | 22,723<br>(2,681)                       | 1.4<br>(1.2 to 1.7)                   | +0.01<br>(-0.2 to +0.3)                 | 0.96    |
|                             | Female patient-<br>male surgeon<br>(discordant)   | 515,505<br>(18,193)                     | 1.4<br>(1.4 to 1.5)                   | Reference                               |         |
|                             | Male patient-<br>male surgeon<br>(concordant)     | 372,286<br>(17,840)                     | 1.9<br>(1.9 to 1.9)                   | -0.3<br>(-0.7 to -0.01)                 | 0.046   |
|                             | Male patient-<br>female surgeon<br>(discordant)   | 14,318<br>(1,690)                       | 2.2<br>(1.9 to 2.6)                   | Reference                               |         |
| Knee replacement            | Female patient-<br>female surgeon<br>(concordant) | 3,673<br>(161)                          | 0.2<br>(0.02 to 0.3)                  | +0.02<br>(-0.1 to +0.2)                 | 0.83    |
|                             | Female patient-<br>male surgeon<br>(discordant)   | 201,164<br>(5,491)                      | 0.2<br>(0.1 to 0.2)                   | Reference                               |         |
|                             | Male patient-<br>male surgeon<br>(concordant)     | 118,803<br>(5,167)                      | 0.3<br>(0.2 to 0.3)                   | +0.2<br>(-0.04 to +0.4)                 | 0.11    |
|                             | Male patient-<br>female surgeon<br>(discordant)   | 1,961<br>(143)                          | 0.1<br>(-0.2 to 0.3)                  | Reference                               |         |
| Hip replacement             | Female patient-<br>female surgeon<br>(concordant) | 3,675<br>(321)                          | 2.1<br>(1.5 to 2.8)                   | +0.4<br>(-0.3 to +1.1)                  | 0.26    |

|                              |                                            |                    |                       |                         |      |
|------------------------------|--------------------------------------------|--------------------|-----------------------|-------------------------|------|
|                              | Female patient-male surgeon (discordant)   | 159,018<br>(6,897) | 1.7<br>(1.7 to 1.8)   | Reference               |      |
|                              | Male patient-male surgeon (concordant)     | 88,743<br>(6,126)  | 2.4<br>(2.3 to 2.5)   | -0.8<br>(-2.1 to +0.6)  | 0.27 |
|                              | Male patient-female surgeon (discordant)   | 1,682<br>(267)     | 3.1<br>(1.9 to 4.4)   | Reference               |      |
| Laminectomy or Spinal Fusion | Female patient-female surgeon (concordant) | 1,722<br>(89)      | 0.4<br>(-0.03 to 0.8) | -0.04<br>(-0.4 to +0.4) | 0.84 |
|                              | Female patient-male surgeon (discordant)   | 61,549<br>(2,385)  | 0.4<br>(0.4 to 0.5)   | Reference               |      |
|                              | Male patient-male surgeon (concordant)     | 51,699<br>(2,404)  | 0.9<br>(0.8 to 0.9)   | -0.2<br>(-1.0 to +0.5)  | 0.59 |
|                              | Male patient-female surgeon (discordant)   | 1,472<br>(85)      | 1.1<br>(0.3 to 1.8)   | Reference               |      |
| Colectomy                    | Female patient-female surgeon (concordant) | 5,117<br>(1,023)   | 5.7<br>(4.9 to 6.4)   | -0.5<br>(-1.3 to +0.4)  | 0.27 |
|                              | Female patient-male surgeon (discordant)   | 36,153<br>(5,233)  | 6.1<br>(5.9 to 6.4)   | Reference               |      |
|                              | Male patient-male surgeon (concordant)     | 25,972<br>(4,778)  | 6.7<br>(6.4 to 7.0)   | -0.6<br>(-1.8 to +0.7)  | 0.37 |



|                                |                                            |                   |                     |                        |      |
|--------------------------------|--------------------------------------------|-------------------|---------------------|------------------------|------|
|                                | Male patient-female surgeon (discordant)   | 2,918<br>(799)    | 7.3<br>(6.1 to 8.4) | Reference              |      |
| Cholecystectomy                | Female patient-female surgeon (concordant) | 3,491<br>(865)    | 2.3<br>(1.7 to 2.9) | -0.2<br>(-0.9 to +0.5) | 0.56 |
|                                | Female patient-male surgeon (discordant)   | 25,578<br>(4,778) | 2.5<br>(2.3 to 2.7) | Reference              |      |
|                                | Male patient-male surgeon (concordant)     | 25,723<br>(4,735) | 2.6<br>(2.4 to 2.8) | -0.1<br>(-0.8 to +0.6) | 0.73 |
|                                | Male patient-female surgeon (discordant)   | 3,475<br>(863)    | 2.8<br>(2.1 to 3.4) | Reference              |      |
| Coronary artery bypass surgery | Female patient-female surgeon (concordant) | 234<br>(30)       | 6.3<br>(2.8 to 9.8) | +1.5<br>(-2.1 to +5.0) | 0.42 |
|                                | Female patient-male surgeon (discordant)   | 8,367<br>(655)    | 4.8<br>(4.4 to 5.3) | Reference              |      |
|                                | Male patient-male surgeon (concordant)     | 23,456<br>(816)   | 2.9<br>(2.7 to 3.1) | -0.8<br>(-2.6 to +0.9) | 0.36 |
|                                | Male patient-female surgeon (discordant)   | 724<br>(42)       | 3.7<br>(2.0 to 5.4) | Reference              |      |
| Lung resection                 | Female patient-female surgeon (concordant) | 335<br>(53)       | 3.5<br>(0.2 to 6.8) | +1.5<br>(-1.9 to +4.8) | 0.40 |

|                                  |                                            |                  |                       |                         |       |
|----------------------------------|--------------------------------------------|------------------|-----------------------|-------------------------|-------|
|                                  | Female patient-male surgeon (discordant)   | 6,637<br>(772)   | 2.1<br>(1.7 to 2.4)   | Reference               |       |
|                                  | Male patient-male surgeon (concordant)     | 6,461<br>(827)   | 3.8<br>(3.3 to 4.2)   | -1.4<br>(-4.9 to +2.2)  | 0.44  |
|                                  | Male patient-female surgeon (discordant)   | 291<br>(51)      | 5.2<br>(1.7 to 8.6)   | Reference               |       |
| Abdominal aortic aneurysm repair | Female patient-female surgeon (concordant) | 124<br>(57)      | 8.2<br>(-1.0 to 17.4) | +1.2<br>(-8.4 to +10.8) | 0.80  |
|                                  | Female patient-male surgeon (discordant)   | 2,704<br>(779)   | 7.0<br>(6.0 to 8.0)   | Reference               |       |
|                                  | Male patient-male surgeon (concordant)     | 8,955<br>(1,108) | 3.9<br>(3.5 to 4.3)   | -3.9<br>(-7.6 to -0.3)  | 0.034 |
|                                  | Male patient-female surgeon (discordant)   | 401<br>(92)      | 7.8<br>(4.3 to 11.4)  | Reference               |       |
| Appendectomy                     | Female patient-female surgeon (concordant) | 1,396<br>(641)   | 2.5<br>(1.6 to 3.4)   | +0.3<br>(-0.7 to +1.3)  | 0.56  |
|                                  | Female patient-male surgeon (discordant)   | 8,226<br>(3,500) | 2.2<br>(1.8 to 2.5)   | Reference               |       |
|                                  | Male patient-male surgeon (concordant)     | 7,400<br>(3,300) | 2.4<br>(2.0 to 2.7)   | -1.8<br>(-3.3 to -0.3)  | 0.016 |

|               |                                            |                |                          |                           |      |
|---------------|--------------------------------------------|----------------|--------------------------|---------------------------|------|
|               | Male patient-female surgeon (discordant)   | 1,049<br>(540) | 4.2<br>(2.8 to 5.6)      | Reference                 |      |
| Cystectomy    | Female patient-female surgeon (concordant) | 10<br>(10)     | 18.8<br>(-5.8 to 43.4)   | +15.4<br>(-9.0 to +39.9)  | 0.21 |
|               | Female patient-male surgeon (discordant)   | 332<br>(196)   | 3.3<br>(1.6 to 5.1)      | Reference                 |      |
|               | Male patient-male surgeon (concordant)     | 1,048<br>(380) | 3.6<br>(2.4 to 4.9)      | -1.3<br>(-22.5 to +20.1)  | 0.91 |
|               | Male patient-female surgeon (discordant)   | 18<br>(14)     | 4.9<br>(-16.1 to 25.9)   | Reference                 |      |
| Thyroidectomy | Female patient-female surgeon (concordant) | 65<br>(54)     | -0.8<br>(-7.9 to 6.3)    | -2.4<br>(-10.7 to +5.9)   | 0.56 |
|               | Female patient-male surgeon (discordant)   | 403<br>(303)   | 1.6<br>(0.05 to 3.2)     | Reference                 |      |
|               | Male patient-male surgeon (concordant)     | 218<br>(187)   | 1.9<br>(-1.9 to 5.6)     | +12.1<br>(-24.3 to +48.4) | 0.49 |
|               | Male patient-female surgeon (discordant)   | 20<br>(17)     | -10.2<br>(-43.1 to 22.7) | Reference                 |      |
| Prostatectomy | Female patient-female surgeon (concordant) | N/A            | N/A                      | N/A                       | N/A  |

|              |                                            |                   |                      |                        |      |
|--------------|--------------------------------------------|-------------------|----------------------|------------------------|------|
|              | Female patient-male surgeon (discordant)   | N/A               | N/A                  | Reference              |      |
|              | Male patient-male surgeon (concordant)     | 13,712<br>(1,939) | 0.9<br>(0.8 to 1.1)  | -0.3<br>(-1.8 to +1.3) | 0.71 |
|              | Male patient-female surgeon (discordant)   | 304<br>(98)       | 1.2<br>(-0.3 to 2.7) | Reference              |      |
| Hysterectomy | Female patient-female surgeon (concordant) | 2,879<br>(998)    | 1.1<br>(0.6 to 1.6)  | +0.2<br>(-0.5 to +0.8) | 0.64 |
|              | Female patient-male surgeon (discordant)   | 5,284<br>(1,757)  | 0.9<br>(0.6 to 1.3)  | Reference              |      |
|              | Male patient-male surgeon (concordant)     | N/A               | N/A                  | N/A                    | N/A  |
|              | Male patient-female surgeon (discordant)   | N/A               | N/A                  | Reference              |      |

Adjusted for patient characteristics (age, race and ethnicity, 27 chronic conditions, procedure type [for the analysis pooling the 14 procedure types], procedure electiveness, weekend versus weekday, month and year of surgery, and Medicaid coverage), surgeon characteristics (years of experience and operative volume), and hospital fixed effects (indicator variables for each hospital, effectively comparing patients treated at the same hospital).

Liver resection was removed as the estimate did not converge due to the small sample size.

Abbreviation: pp = percentage point.

**eTable 18. Association between patient-surgeon gender concordance and patient adjusted 30-day mortality rates for low-mortality hospitals (elective and non-elective procedures combined)**

|                             |                                                   | No. of patients<br>(No. of<br>surgeons) | Adjusted mortality<br>rate, % (95%CI) | Adjusted risk difference,<br>pp (95%CI) | P-value |
|-----------------------------|---------------------------------------------------|-----------------------------------------|---------------------------------------|-----------------------------------------|---------|
| 14 procedures<br>(combined) | Female patient-<br>female surgeon<br>(concordant) | 46,836<br>(5,076)                       | 1.1<br>(0.9 to 1.2)                   | -0.1<br>(-0.3 to +0.04)                 | 0.15    |
|                             | Female patient-<br>male surgeon<br>(discordant)   | 777,532<br>(27,300)                     | 1.2<br>(1.2 to 1.2)                   | Reference                               |         |
|                             | Male patient-<br>male surgeon<br>(concordant)     | 599,850<br>(27,008)                     | 1.6<br>(1.6 to 1.6)                   | -0.02<br>(-0.2 to +0.2)                 | 0.83    |
|                             | Male patient-<br>female surgeon<br>(discordant)   | 27,146<br>(3,216)                       | 1.6<br>(1.4 to 1.8)                   | Reference                               |         |
| Knee replacement            | Female patient-<br>female surgeon<br>(concordant) | 4,565<br>(228)                          | 0.2<br>(0.03 to 0.3)                  | +0.1<br>(-0.1 to +0.2)                  | 0.40    |
|                             | Female patient-<br>male surgeon<br>(discordant)   | 260,772<br>(6,463)                      | 0.1<br>(0.1 to 0.1)                   | Reference                               |         |
|                             | Male patient-<br>male surgeon<br>(concordant)     | 148,668<br>(6,140)                      | 0.2<br>(0.2 to 0.2)                   | +0.1<br>(-0.2 to +0.4)                  | 0.52    |
|                             | Male patient-<br>female surgeon<br>(discordant)   | 2,206<br>(193)                          | 0.1<br>(-0.2 to 0.4)                  | Reference                               |         |
| Hip replacement             | Female patient-<br>female surgeon<br>(concordant) | 5,375<br>(502)                          | 1.5<br>(1.1 to 2.0)                   | +0.2<br>(-0.2 to +0.7)                  | 0.35    |

|                                 |                                            |                    |                      |                         |       |
|---------------------------------|--------------------------------------------|--------------------|----------------------|-------------------------|-------|
|                                 | Female patient-male surgeon (discordant)   | 230,634<br>(8,930) | 1.3<br>(1.3 to 1.3)  | Reference               |       |
|                                 | Male patient-male surgeon (concordant)     | 128,254<br>(7,896) | 1.9<br>(1.8 to 2.0)  | +0.2<br>(-0.7 to +1.1)  | 0.71  |
|                                 | Male patient-female surgeon (discordant)   | 2,545<br>(409)     | 1.8<br>(0.9 to 2.6)  | Reference               |       |
| Laminectomy<br>or Spinal Fusion | Female patient-female surgeon (concordant) | 2,517<br>(188)     | 0.4<br>(0.03 to 0.7) | -0.1<br>(-0.4 to +0.3)  | 0.79  |
|                                 | Female patient-male surgeon (discordant)   | 103,396<br>(3,944) | 0.4<br>(0.4 to 0.4)  | Reference               |       |
|                                 | Male patient-male surgeon (concordant)     | 89,136<br>(3,973)  | 0.9<br>(0.8 to 0.9)  | -0.7<br>(-1.3 to -0.1)  | 0.026 |
|                                 | Male patient-female surgeon (discordant)   | 2,075<br>(206)     | 1.6<br>(1.0 to 2.2)  | Reference               |       |
| Colectomy                       | Female patient-female surgeon (concordant) | 11,854<br>(1,953)  | 4.0<br>(3.5 to 4.4)  | -0.3<br>(-0.8 to +0.2)  | 0.21  |
|                                 | Female patient-male surgeon (discordant)   | 62,515<br>(8,040)  | 4.3<br>(4.1 to 4.4)  | Reference               |       |
|                                 | Male patient-male surgeon (concordant)     | 44,329<br>(7,278)  | 4.9<br>(4.7 to 5.1)  | -0.04<br>(-0.7 to +0.7) | 0.91  |

|                                |                                            |                   |                     |                          |      |
|--------------------------------|--------------------------------------------|-------------------|---------------------|--------------------------|------|
|                                | Male patient-female surgeon (discordant)   | 6,435<br>(1,410)  | 4.9<br>(4.3 to 5.6) | Reference                |      |
| Cholecystectomy                | Female patient-female surgeon (concordant) | 5,978<br>(1,554)  | 1.6<br>(1.3 to 2.0) | -0.002<br>(-0.4 to +0.4) | 0.99 |
|                                | Female patient-male surgeon (discordant)   | 38,158<br>(7,034) | 1.6<br>(1.5 to 1.8) | Reference                |      |
|                                | Male patient-male surgeon (concordant)     | 39,060<br>(6,945) | 1.7<br>(1.6 to 1.9) | +0.1<br>(-0.3 to +0.5)   | 0.69 |
|                                | Male patient-female surgeon (discordant)   | 5,838<br>(1,463)  | 1.7<br>(1.3 to 2.0) | Reference                |      |
| Coronary artery bypass surgery | Female patient-female surgeon (concordant) | 514<br>(72)       | 3.0<br>(1.0 to 5.0) | -0.8<br>(-2.9 to +1.2)   | 0.43 |
|                                | Female patient-male surgeon (discordant)   | 18,849<br>(1,423) | 3.9<br>(3.6 to 4.1) | Reference                |      |
|                                | Male patient-male surgeon (concordant)     | 56,061<br>(1,663) | 2.0<br>(1.9 to 2.1) | -0.1<br>(-1.0 to +0.8)   | 0.87 |
|                                | Male patient-female surgeon (discordant)   | 1,550<br>(96)     | 2.1<br>(1.2 to 3.0) | Reference                |      |
| Lung resection                 | Female patient-female surgeon (concordant) | 2,434<br>(151)    | 1.0<br>(0.6 to 1.5) | -0.2<br>(-0.7 to +0.3)   | 0.44 |

|                                  |                                            |                   |                      |                        |      |
|----------------------------------|--------------------------------------------|-------------------|----------------------|------------------------|------|
|                                  | Female patient-male surgeon (discordant)   | 23,519<br>(1,391) | 1.2<br>(1.1 to 1.4)  | Reference              |      |
|                                  | Male patient-male surgeon (concordant)     | 20,377<br>(1,493) | 2.0<br>(1.8 to 2.2)  | -0.6<br>(-1.5 to +0.3) | 0.19 |
|                                  | Male patient-female surgeon (discordant)   | 1,806<br>(146)    | 2.6<br>(1.7 to 3.4)  | Reference              |      |
| Abdominal aortic aneurysm repair | Female patient-female surgeon (concordant) | 439<br>(176)      | 7.5<br>(4.3 to 10.6) | +1.2<br>(-2.1 to +4.4) | 0.48 |
|                                  | Female patient-male surgeon (discordant)   | 7,209<br>(1,720)  | 6.3<br>(5.7 to 6.8)  | Reference              |      |
|                                  | Male patient-male surgeon (concordant)     | 22,527<br>(2,232) | 3.5<br>(3.2 to 3.7)  | -0.3<br>(-1.6 to +1.0) | 0.61 |
|                                  | Male patient-female surgeon (discordant)   | 1,385<br>(259)    | 3.8<br>(2.6 to 5.0)  | Reference              |      |
| Appendectomy                     | Female patient-female surgeon (concordant) | 2,867<br>(1,269)  | 1.5<br>(1.0 to 1.9)  | +0.3<br>(-0.3 to +0.8) | 0.32 |
|                                  | Female patient-male surgeon (discordant)   | 13,112<br>(5,188) | 1.2<br>(1.0 to 1.4)  | Reference              |      |
|                                  | Male patient-male surgeon (concordant)     | 10,302<br>(4,740) | 1.9<br>(1.6 to 2.2)  | +0.1<br>(-0.8 to +1.0) | 0.79 |



|                 |                                            |                  |                       |                         |      |
|-----------------|--------------------------------------------|------------------|-----------------------|-------------------------|------|
|                 | Male patient-female surgeon (discordant)   | 1,728<br>(940)   | 1.8<br>(1.0 to 2.6)   | Reference               |      |
| Cystectomy      | Female patient-female surgeon (concordant) | 194<br>(79)      | 0.7<br>(-1.3 to 2.7)  | -1.4<br>(-3.7 to +0.8)  | 0.22 |
|                 | Female patient-male surgeon (discordant)   | 1,779<br>(585)   | 2.1<br>(1.5 to 2.8)   | Reference               |      |
|                 | Male patient-male surgeon (concordant)     | 6,065<br>(1,047) | 2.3<br>(1.9 to 2.7)   | -0.7<br>(-3.0 to +1.5)  | 0.52 |
|                 | Male patient-female surgeon (discordant)   | 351<br>(74)      | 3.0<br>(0.9 to 5.2)   | Reference               |      |
| Thyroidectomy   | Female patient-female surgeon (concordant) | 202<br>(129)     | 0.8<br>(0.1 to 1.5)   | +0.2<br>(-0.3 to +0.8)  | 0.43 |
|                 | Female patient-male surgeon (discordant)   | 1,183<br>(667)   | 0.5<br>(0.2 to 0.9)   | Reference               |      |
|                 | Male patient-male surgeon (concordant)     | 742<br>(467)     | 1.5<br>(0.5 to 2.4)   | +0.5<br>(-2.9 to +3.9)  | 0.79 |
|                 | Male patient-female surgeon (discordant)   | 125<br>(78)      | 1.0<br>(-2.0 to 4.0)  | Reference               |      |
| Liver resection | Female patient-female surgeon (concordant) | 50<br>(37)       | 8.5<br>(-1.1 to 18.1) | +5.4<br>(-4.9 to +15.6) | 0.30 |

|               |                                            |                   |                       |                         |      |
|---------------|--------------------------------------------|-------------------|-----------------------|-------------------------|------|
|               | Female patient-male surgeon (discordant)   | 477<br>(249)      | 3.1<br>(1.4 to 4.8)   | Reference               |      |
|               | Male patient-male surgeon (concordant)     | 643<br>(274)      | 3.5<br>(2.1 to 5.0)   | +4.3<br>(-3.7 to +12.3) | 0.29 |
|               | Male patient-female surgeon (discordant)   | 69<br>(36)        | -0.8<br>(-8.0 to 6.4) | Reference               |      |
| Prostatectomy | Female patient-female surgeon (concordant) | N/A               | N/A                   | N/A                     | N/A  |
|               | Female patient-male surgeon (discordant)   | N/A               | N/A                   | Reference               |      |
|               | Male patient-male surgeon (concordant)     | 33,686<br>(3,334) | 0.7<br>(0.6 to 0.8)   | -0.4<br>(-1.3 to +0.6)  | 0.44 |
|               | Male patient-female surgeon (discordant)   | 1,033<br>(202)    | 1.1<br>(0.2 to 2.0)   | Reference               |      |
| Hysterectomy  | Female patient-female surgeon (concordant) | 9,847<br>(2,026)  | 0.6<br>(0.4 to 0.8)   | -0.04<br>(-0.3 to +0.2) | 0.76 |
|               | Female patient-male surgeon (discordant)   | 15,929<br>(3,006) | 0.7<br>(0.5 to 0.8)   | Reference               |      |
|               | Male patient-male surgeon (concordant)     | N/A               | N/A                   | N/A                     | N/A  |

|  |                                                 |     |     |           |
|--|-------------------------------------------------|-----|-----|-----------|
|  | Male patient-<br>female surgeon<br>(discordant) | N/A | N/A | Reference |
|--|-------------------------------------------------|-----|-----|-----------|

Adjusted for patient characteristics (age, race and ethnicity, 27 chronic conditions, procedure type [for the analysis pooling the 14 procedure types], procedure electiveness, weekend versus weekday, month and year of surgery, and Medicaid coverage), surgeon characteristics (years of experience and operative volume), and hospital fixed effects (indicator variables for each hospital, effectively comparing patients treated at the same hospital).

Abbreviation: pp = percentage point.

**eTable 19. Association between patient-surgeon gender concordance and patient adjusted 30-day mortality rates for high-mortality hospitals (elective and non-elective procedures combined)**

|                             |                                                   | No. of patients<br>(No. of<br>surgeons) | Adjusted mortality<br>rate, % (95%CI) | Adjusted risk difference,<br>pp (95%CI) | P-value |
|-----------------------------|---------------------------------------------------|-----------------------------------------|---------------------------------------|-----------------------------------------|---------|
| 14 procedures<br>(combined) | Female patient-<br>female surgeon<br>(concordant) | 39,297<br>(4,476)                       | 1.6<br>(1.4 to 1.8)                   | -0.2<br>(-0.4 to +0.03)                 | 0.095   |
|                             | Female patient-<br>male surgeon<br>(discordant)   | 784,435<br>(25,722)                     | 1.8<br>(1.8 to 1.8)                   | Reference                               |         |
|                             | Male patient-<br>male surgeon<br>(concordant)     | 601,862<br>(25,341)                     | 2.4<br>(2.4 to 2.5)                   | +0.6<br>(+0.3 to +0.8)                  | <0.0001 |
|                             | Male patient-<br>female surgeon<br>(discordant)   | 25,798<br>(2,929)                       | 1.9<br>(1.6 to 2.1)                   | Reference                               |         |
| Knee replacement            | Female patient-<br>female surgeon<br>(concordant) | 4,210<br>(193)                          | 0.2<br>(0.02 to 0.3)                  | -0.01<br>(-0.2 to +0.2)                 | 0.92    |
|                             | Female patient-<br>male surgeon<br>(discordant)   | 281,014<br>(6,333)                      | 0.2<br>(0.2 to 0.2)                   | Reference                               |         |
|                             | Male patient-<br>male surgeon<br>(concordant)     | 164,452<br>(5,960)                      | 0.3<br>(0.3 to 0.3)                   | +0.2<br>(-0.03 to +0.4)                 | 0.10    |
|                             | Male patient-<br>female surgeon<br>(discordant)   | 2,281<br>(173)                          | 0.1<br>(-0.05 to 0.3)                 | Reference                               |         |
| Hip replacement             | Female patient-<br>female surgeon<br>(concordant) | 5,046<br>(423)                          | 2.1<br>(1.5 to 2.6)                   | +0.1<br>(-0.5 to +0.7)                  | 0.73    |

|                              |                                            |                    |                     |                        |        |
|------------------------------|--------------------------------------------|--------------------|---------------------|------------------------|--------|
|                              | Female patient-male surgeon (discordant)   | 226,838<br>(8,491) | 2.0<br>(1.9 to 2.0) | Reference              |        |
|                              | Male patient-male surgeon (concordant)     | 127,140<br>(7,552) | 2.7<br>(2.6 to 2.8) | +0.5<br>(-0.5 to +1.4) | 0.36   |
|                              | Male patient-female surgeon (discordant)   | 2,503<br>(337)     | 2.2<br>(1.3 to 3.2) | Reference              |        |
| Laminectomy or Spinal Fusion | Female patient-female surgeon (concordant) | 2,900<br>(226)     | 0.5<br>(0.1 to 0.9) | -0.1<br>(-0.5 to +0.3) | 0.63   |
|                              | Female patient-male surgeon (discordant)   | 112,597<br>(3,935) | 0.6<br>(0.6 to 0.6) | Reference              |        |
|                              | Male patient-male surgeon (concordant)     | 95,098<br>(4,029)  | 1.2<br>(1.2 to 1.3) | +0.3<br>(-0.3 to +1.0) | 0.28   |
|                              | Male patient-female surgeon (discordant)   | 2,558<br>(224)     | 0.9<br>(0.3 to 1.5) | Reference              |        |
| Colectomy                    | Female patient-female surgeon (concordant) | 9,102<br>(1,775)   | 6.4<br>(5.8 to 7.0) | -0.9<br>(-1.6 to -0.2) | 0.0087 |
|                              | Female patient-male surgeon (discordant)   | 55,114<br>(7,446)  | 7.3<br>(7.1 to 7.5) | Reference              |        |
|                              | Male patient-male surgeon (concordant)     | 38,881<br>(6,821)  | 8.5<br>(8.2 to 8.8) | +1.2<br>(+0.2 to +2.1) | 0.016  |

|                                |                                            |                   |                     |                        |        |
|--------------------------------|--------------------------------------------|-------------------|---------------------|------------------------|--------|
|                                | Male patient-female surgeon (discordant)   | 5,260<br>(1,326)  | 7.3<br>(6.5 to 8.2) | Reference              |        |
| Cholecystectomy                | Female patient-female surgeon (concordant) | 5,235<br>(1,433)  | 2.9<br>(2.3 to 3.4) | -0.5<br>(-1.1 to +0.1) | 0.092  |
|                                | Female patient-male surgeon (discordant)   | 35,430<br>(6,551) | 3.3<br>(3.2 to 3.5) | Reference              |        |
|                                | Male patient-male surgeon (concordant)     | 36,981<br>(6,464) | 3.6<br>(3.4 to 3.8) | +1.0<br>(+0.5 to +1.6) | 0.0002 |
|                                | Male patient-female surgeon (discordant)   | 5,321<br>(1,354)  | 2.5<br>(2.0 to 3.0) | Reference              |        |
| Coronary artery bypass surgery | Female patient-female surgeon (concordant) | 827<br>(91)       | 4.9<br>(2.9 to 6.9) | -0.9<br>(-2.9 to +1.2) | 0.42   |
|                                | Female patient-male surgeon (discordant)   | 21,107<br>(1,475) | 5.7<br>(5.4 to 6.1) | Reference              |        |
|                                | Male patient-male surgeon (concordant)     | 58,097<br>(1,725) | 3.3<br>(3.2 to 3.5) | +0.1<br>(-0.8 to +1.1) | 0.77   |
|                                | Male patient-female surgeon (discordant)   | 2,404<br>(113)    | 3.2<br>(2.3 to 4.1) | Reference              |        |
|                                | Female patient-female surgeon (concordant) | 1,349<br>(134)    | 1.9<br>(0.8 to 3.0) | -0.1<br>(-1.3 to +1.1) | 0.86   |

|                                  |                                            |                   |                      |                         |      |
|----------------------------------|--------------------------------------------|-------------------|----------------------|-------------------------|------|
| Lung resection                   | Female patient-male surgeon (discordant)   | 17,669<br>(1,511) | 2.0<br>(1.8 to 2.2)  | Reference               |      |
|                                  | Male patient-male surgeon (concordant)     | 16,493<br>(1,607) | 3.7<br>(3.4 to 4.0)  | +0.8<br>(-0.5 to +2.1)  | 0.23 |
|                                  | Male patient-female surgeon (discordant)   | 1,214<br>(135)    | 2.9<br>(1.6 to 4.1)  | Reference               |      |
| Abdominal aortic aneurysm repair | Female patient-female surgeon (concordant) | 511<br>(199)      | 7.1<br>(4.1 to 10.2) | -1.4<br>(-4.6 to +1.8)  | 0.39 |
|                                  | Female patient-male surgeon (discordant)   | 7,816<br>(1,818)  | 8.6<br>(7.9 to 9.2)  | Reference               |      |
|                                  | Male patient-male surgeon (concordant)     | 23,370<br>(2,271) | 5.3<br>(5.0 to 5.6)  | +0.03<br>(-1.5 to +1.6) | 0.97 |
|                                  | Male patient-female surgeon (discordant)   | 1,585<br>(250)    | 5.3<br>(3.8 to 6.7)  | Reference               |      |
| Appendectomy                     | Female patient-female surgeon (concordant) | 2,259<br>(1,063)  | 3.0<br>(2.2 to 3.8)  | +0.3<br>(-0.6 to +1.1)  | 0.51 |
|                                  | Female patient-male surgeon (discordant)   | 11,104<br>(4,661) | 2.7<br>(2.4 to 3.0)  | Reference               |      |
|                                  | Male patient-male surgeon (concordant)     | 9,082<br>(4,242)  | 3.9<br>(3.5 to 4.3)  | +0.1<br>(-1.2 to +1.4)  | 0.92 |

|               |                                            |                  |                       |                          |        |
|---------------|--------------------------------------------|------------------|-----------------------|--------------------------|--------|
|               | Male patient-female surgeon (discordant)   | 1,433<br>(785)   | 3.8<br>(2.6 to 5.0)   | Reference                |        |
| Cystectomy    | Female patient-female surgeon (concordant) | 112<br>(57)      | 1.8<br>(-1.4 to 4.9)  | -2.0<br>(-5.4 to +1.5)   | 0.26   |
|               | Female patient-male surgeon (discordant)   | 1,215<br>(580)   | 3.7<br>(2.7 to 4.7)   | Reference                |        |
|               | Male patient-male surgeon (concordant)     | 4,259<br>(1,001) | 4.2<br>(3.6 to 4.8)   | +2.6<br>(+0.7 to +4.5)   | 0.0080 |
|               | Male patient-female surgeon (discordant)   | 261<br>(58)      | 1.6<br>(-0.2 to 3.4)  | Reference                |        |
| Thyroidectomy | Female patient-female surgeon (concordant) | 208<br>(124)     | -0.3<br>(-1.7 to 1.2) | -1.0<br>(-2.8 to +0.8)   | 0.29   |
|               | Female patient-male surgeon (discordant)   | 1,015<br>(620)   | 0.7<br>(0.2 to 1.2)   | Reference                |        |
|               | Male patient-male surgeon (concordant)     | 656<br>(440)     | 1.7<br>(0.7 to 2.7)   | +0.2<br>(-2.8 to +3.2)   | 0.89   |
|               | Male patient-female surgeon (discordant)   | 121<br>(72)      | 1.5<br>(-1.1 to 4.1)  | Reference                |        |
|               | Female patient-female surgeon (concordant) | 30<br>(22)       | 5.2<br>(-5.0 to 15.4) | -0.4<br>(-11.2 to +10.5) | 0.94   |



|                 |                                            |                   |                      |                        |        |
|-----------------|--------------------------------------------|-------------------|----------------------|------------------------|--------|
| Liver resection | Female patient-male surgeon (discordant)   | 420<br>(228)      | 5.6<br>(3.5 to 7.6)  | Reference              |        |
|                 | Male patient-male surgeon (concordant)     | 513<br>(260)      | 8.8<br>(6.5 to 11.0) | +0.9<br>(-5.9 to +7.7) | 0.79   |
|                 | Male patient-female surgeon (discordant)   | 52<br>(27)        | 7.8<br>(1.4 to 14.2) | Reference              |        |
| Prostatectomy   | Female patient-female surgeon (concordant) | N/A               | N/A                  | N/A                    | N/A    |
|                 | Female patient-male surgeon (discordant)   | N/A               | N/A                  | Reference              |        |
|                 | Male patient-male surgeon (concordant)     | 26,840<br>(2,889) | 1.2<br>(1.0 to 1.3)  | +1.0<br>(+0.3 to +1.7) | 0.0079 |
|                 | Male patient-female surgeon (discordant)   | 805<br>(192)      | 0.2<br>(-0.5 to 0.9) | Reference              |        |
| Hysterectomy    | Female patient-female surgeon (concordant) | 7,508<br>(1,691)  | 1.3<br>(1.0 to 1.6)  | -0.2<br>(-0.6 to +0.2) | 0.26   |
|                 | Female patient-male surgeon (discordant)   | 13,096<br>(2,681) | 1.5<br>(1.3 to 1.7)  | Reference              |        |
|                 | Male patient-male surgeon (concordant)     | N/A               | N/A                  | N/A                    | N/A    |

|  |                                                 |     |     |           |
|--|-------------------------------------------------|-----|-----|-----------|
|  | Male patient-<br>female surgeon<br>(discordant) | N/A | N/A | Reference |
|--|-------------------------------------------------|-----|-----|-----------|

Adjusted for patient characteristics (age, race and ethnicity, 27 chronic conditions, procedure type [for the analysis pooling the 14 procedure types], procedure electiveness, weekend versus weekday, month and year of surgery, and Medicaid coverage), surgeon characteristics (years of experience and operative volume), and hospital fixed effects (indicator variables for each hospital, effectively comparing patients treated at the same hospital).

Abbreviation: pp = percentage point.
